# Supplementary material for: Optimizing the Composting Process Emissions – Process Kinetics and Artificial Intelligence Approach
Source: Preprints.org preprint supplement (doi:10.20944/preprints202404.1828.v1), 2024-04-28
Supplement: Supplementary file 3 [file supplementary]

## Sheet: Read me
	The table of content
	Sheet no.	Name of the content
	1	Read me
	2	Fig. S1.Principal component analysis of collected data
	3	Table S1. Estimated maximum gas production (PCO2, mg·g-1d.m; PCO, PH2S or PNH3 µg·g-1d.m), production constant rate (k, h−1), and average production rate (r, CO2 mg·g-1d.m; CO, H2S or NH3 µg·g-1d.m), during the composting in different temperature incubations, biochar type and biochar dose.
	4	Table S2. Experimental and predicted CO emission, µg CO ·g-1d.m , in different machine learning models
	5	Table S3. Experimental and predicted CO2 emission, mg CO2·g-1d.m, in different machine learning models
	6	Table S4. Experimental and predicted H2S emission, µg H2S·g-1d.m, in different machine learning models
	7	Table S5. Experimental and predicted NH3 emission, µg NH3·g-1d.m in different machine learning models

## Sheet: Sheet 2
		Figure S1.Principal component analysis of collected data

## Sheet: Sheet 3
Table S1. Estimated maximum gas production (PCO2, mg·g-1d.m; PCO, PH2S or PNH3 µg·g-1d.m), production constant rate (k, h−1), and average production rate (r , CO2 mg·g-1d.m; CO, H2S or NH3 µg·g-1d.m), during the composting in different temperature incubations, biochar type and biochar dose.
				CO2				CO				H2S				NH3
	Temperature	Biochar type	Biochar_dose		k, h-1	r, mgCO2×h-1	R2	PCO, µgCO×h-1	k, h-1	r, µgCO×h-1	R2	PH2S, µgH2S×h-1	k, h-1	r, µgH2S×h-1	R2	PNH3, µgNH3×h-1	k, h-1	r, µgNH3×h-1	R2
	50	550	0	585.013	0.00783387	4.58291	0.526915	553.097	0.0422056	23.3438	0.789621	83.487	0.0418443	3.49345	0.795028	11.925	0.0101464	0.120996	0.276768
	50	550	3	488.882	0.00822578	4.02144	0.755394	176.232	0.026491	4.66856	0.111605	27.7218	0.0266961	0.740064	0.235131	26.8926	0.00430656	0.115814	0.507332
	50	550	6	564.13	0.00785995	4.43403	0.573693	362.832	0.0420671	15.2633	0.173119	49.9723	0.0430776	2.15269	0.306376	57.1512	0.00286266	0.163605	0.0384151
	50	550	9	538.194	0.0105531	5.67963	0.455021	586.21	0.0315704	18.5069	0.341347	116.451	0.0399274	4.64958	0.108927	48.3959	0.0025044	0.121203	0.698267
	50	550	12	528.545	0.00822792	4.34883	0.194986	212.222	0.0405687	8.60957	0.0381978	57.0428	0.0524976	2.99461	0.0359127	32.5319	0.00445065	0.144788	0.854364
	50	550	15	884.609	0.00513718	4.5444	0.848044	450.649	0.0196338	8.84797	0.568946	65.9768	0.0200911	1.32554	0.503996	52.0723	0.00230823	0.120195	0.614129
	50	600	0	602.808	0.00565487	3.4088	0.598692	516.868	0.0166399	8.60064	0.449327	83.487	0.0418443	3.49345	0.795028	49.7631	0.00272838	0.135773	0.16275
	50	600	3	491.952	0.00596388	2.93394	0.805825	335.715	0.0158058	5.30623	0.521727	27.7218	0.0266961	0.740064	0.235131	68.7815	0.00263714	0.181387	0.550722
	50	600	6	589.184	0.00523132	3.08221	0.296144	370.945	0.00996069	3.69486	0.274298	49.9723	0.0430776	2.15269	0.306376	105.212	0.00284229	0.299042	0.393284
	50	600	9	426.317	0.00735399	3.13513	0.663676	451.972	0.0212919	9.62336	0.814132	116.451	0.0399274	4.64958	0.108927	60.7303	0.00277414	0.168475	0.56409
	50	600	12	500.797	0.00787745	3.945	0.951544	250.151	0.0192777	4.82234	0.225309	57.0428	0.0524976	2.99461	0.0359127	56.7166	0.00273327	0.155022	0.655634
	50	600	15	478.393	0.00662762	3.17061	0.66899	248.077	0.0144847	3.59333	0.102546	65.9768	0.0200911	1.32554	0.503996	77.6401	0.00264768	0.205566	0.428203
	50	650	0	792.872	0.00527565	4.18291	0.424013	681.159	0.0233752	15.9222	0.248019	66.1819	0.0166291	1.10055	0.505356	0	0	0	0
	50	650	3	768.389	0.00554151	4.25803	0.953372	975.006	0.0108072	10.5371	0.25571	52.4495	0.0180974	0.9492	0.410976	0	0	0	0
	50	650	6	705.786	0.00593701	4.19026	0.207915	564.243	0.0204835	11.5577	0.77437	49.9631	0.0114831	0.573732	0.355523	0	0	0	0
	50	650	9	615.657	0.00533762	3.28614	0.281774	907.819	0.0160829	14.6004	0.50816	59.6431	0.0207327	1.23656	0.828702	0	0	0	0
	50	650	12	695.038	0.00460351	3.19961	0.354837	322.43	0.0180457	5.81848	0.149697	37.6597	0.0194876	0.733899	0.299594	0	0	0	0
	50	650	15	800.191	0.00626683	5.01466	0.967811	689.008	0.0219652	15.1342	0.815598	48.2059	0.0179024	0.863	0.115814	0	0	0	0
	60	550	0	317.377	0.0221566	7.03199	0.767001	503.631	0.0288537	14.5316	0.849521	128.61	0.03	3.8583	0.273658	323.609	0.00281497	0.910949	0.993246
	60	550	3	485.804	0.00950168	4.61595	0.832568	675.846	0.029311	19.8097	0.816403	134.96	0.031	4.18376	0.273658	365.337	0.00272786	0.996589	0.850029
	60	550	6	597.313	0.00797871	4.76579	0.874061	701.3	0.0262473	18.4072	0.746894	156.49	0.027	4.22523	0.423146	206.543	0.00573372	1.18426	0.508496
	60	550	9	517.812	0.00912649	4.7258	0.54776	360.18	0.0530032	19.0907	0.311564	74.61	0.049	3.65589	0.419433	371.003	0.00287794	1.06772	0.872123
	60	550	12	553.273	0.00850059	4.70314	0.0852794	642.743	0.0275313	17.6955	0.903021	117.89	0.03	3.5367	0.419433	226.258	0.00300853	0.680704	0.527231
	60	550	15	529.027	0.00926894	4.90352	0.543716	647.497	0.0365259	23.6504	0.866355	119.26	0.037	4.41262	0.465451	240.758	0.00298082	0.717657	0.755803
	60	600	0	494.627	0.0108005	5.34223	0.446919	790.29	0.0354226	27.9942	0.712771	83.487	0.0418443	3.49345	0.795028	65.514	0.00324164	0.212373	0.201887
	60	600	3	562.7	0.00826714	4.65192	0.164361	517.875	0.0348001	18.0221	0.880009	27.7218	0.0266961	0.740064	0.235131	70.9512	0.00312222	0.221526	0.245137
	60	600	6	536.928	0.00793315	4.25953	0.322495	511.099	0.0555819	28.4078	0.964631	49.9723	0.0430776	2.15269	0.306376	136.136	0.00241592	0.328894	0.283409
	60	600	9	576.205	0.00687509	3.96146	0.616552	406.298	0.0392389	15.9427	0.173107	116.451	0.0399274	4.64958	0.108927	76.3463	0.00255895	0.195366	0.0802755
	60	600	12	601.575	0.00701312	4.21892	0.856947	617.258	0.043785	27.0267	0.365192	57.0428	0.0524976	2.99461	0.0359127	59.8638	0.00271312	0.162418	0.357329
	60	600	15	480.168	0.00806187	3.87105	0.914772	553.359	0.0312614	17.2988	0.786024	65.9768	0.0200911	1.32554	0.503996	49.7149	0.00241422	0.120023	0.409599
	60	650	0	649.702	0.00686873	4.46263	0.491887	877.093	0.0256861	22.5291	0.274161	174.4	0.029	5.0576	0.505356	217.27	0.00334535	0.726845	0.171748
	60	650	3	714.092	0.005966	4.26028	0.880042	1158.57	0.0210375	24.3734	0.765245	257.013	0.024	6.16831	0.410976	148.666	0.0026541	0.394576	0.596907
	60	650	6	845.268	0.00522714	4.41833	0.39148	1478.06	0.0137348	20.3008	0.809059	230.63	0.016	3.69008	0.355523	66.3068	0.00351547	0.233099	0.717501
	60	650	9	603.756	0.00363737	2.19608	0.134585	1945.45	0.0070452	13.7061	0.705092	241.81	0.006	1.45086	0.828702	31.8171	0.0061718	0.196369	0.450516
	60	650	12	384.072	0.00708199	2.71999	0.0782072	1286.24	0.0113167	14.556	0.376975	222.87	0.011	2.45157	0.299594	29.3219	0.0048535	0.142314	0.258137
	60	650	15	146.784	0.00927308	1.36114	0.38757	1696.24	0.0118223	20.0534	0.417054	246.27	0.011	2.70897	0.115814	25.23	0.00723375	0.182508	0.990192
	70	550	0	301.367	0.00982448	2.96077	0.388468	751.48	0.00983584	7.39144	0.830442	96.58	0.0126181	1.21865	0.273658	64.8854	0.00315065	0.204431	0.507076
	70	550	3	266.591	0.00598019	1.59427	0.574626	1198.4	0.047	56.3248	0.982	96.58	0.0126181	1.21865	0.273658	89.9301	0.00347039	0.312092	0.110904
	70	550	6	56.599	0.00628878	0.355939	0.711274	1957.25	0.036	70.461	0.966	44.4168	0.0249989	1.11037	0.423146	148.172	0.00287927	0.426626	0.992047
	70	550	9	294.329	0.00723414	2.12922	0.757454	846.617	0.016	13.5459	0.986	77.1452	0.0187552	1.44687	0.419433	98.4464	0.00282453	0.278065	0.356299
	70	550	12	126.884	0.0102771	1.304	0.883039	1207.15	0.003	3.62145	0.936	77.1452	0.0187552	1.44687	0.419433	177.114	0.00375754	0.665514	0.0200066
	70	550	15	159.474	0.00574852	0.91674	0.560764	1068.77	0.006	6.41262	0.969	72.3818	0.0286128	2.07105	0.465451	273.323	0.00352579	0.963679	0.771633
	70	600	0	240.738	0.00440695	1.06092	0.473492	1066.62	0.006	6.39972	0.998	128.622	0.029798	3.83267	0.889202	192.057	0.00240453	0.461808	0.138104
	70	600	3	14.923	0.024234	0.361643	0.289653	394.95	0.012	4.7394	0.993	134.903	0.0311069	4.19642	0.789754	175.724	0.00276975	0.486713	0.365784
	70	600	6	39.914	0.00985818	0.393479	0.118436	992.934	0.007	6.95054	0.999	156.444	0.0267885	4.1909	0.829297	156.349	0.00267455	0.418163	0.370904
	70	600	9	51.627	0.00491939	0.253973	0.274339	1933.08	0.004	7.73232	0.996	74.6067	0.0488088	3.64147	0.888935	107.268	0.00275782	0.295825	0.238271
	70	600	12	31.073	0.0118774	0.369066	0.189903	5830.92	0.002	11.6618	0.985	117.867	0.029826	3.51552	0.734075	83.836	0.0027136	0.227497	0.294459
	70	600	15	27.565	0.0102224	0.281781	0.747932	1473.13	0.006	8.83878	0.979	119.511	0.0357944	4.27783	0.902899	85.4655	0.00232758	0.198927	0.652082
	70	650	0	272.77	0.00686998	1.87393	0.887101	492.835	0.02	9.8567	0.991	192.085	0.0402601	7.73336	0.840898	0	0	0	0
	70	650	3	163.809	0.0108747	1.78138	0.637379	971.943	0.005	4.85972	0.988	102.739	0.0425892	4.37556	0.237314	0	0	0	0
	70	650	6	39.56	0.0123108	0.487014	0.163307	2309.72	0.003	6.92916	0.995	142.188	0.0649741	9.23851	0.56306	0	0	0	0
	70	650	9	47.439	0.0148465	0.704304	0.525158	846.616	0.016	13.5459	0.977	148.315	0.062496	9.26907	0.069812	0	0	0	0
	70	650	12	25.577	0.0150219	0.384215	0.348094	3233.4	0.005	16.167	0.991	234.115	0.0634471	14.8539	0.578748	0	0	0	0
	70	650	15	48.161	0.0075449	0.36337	0.581499	1215.1	0.001	1.2151	0.997	132.595	0.041619	5.51848	0.376702	0	0	0	0

## Sheet: sheet 4
	Table S2. Experimental and predicted CO emission. µg CO ·g-1d.m . in different machine learning models
	Temperature	Biochar type	Biochar_dose	Time	Experimental data	Linear Regression	Random Forest	SVM with Linear Kernel	SVM with Radial Basis Function Kernel	k-Nearest Neighbors	Bayesian Regularized Neural Network	Recursive Partitioning and Regression Trees	Generalized Boosted Regression Models	Extreme Gradient Boosting Tree
	50	550	0	24	431.757665776156	-79.5962	328.5761	101.6596	309.9899	368.9808	353.9517	308.9212	458.6007	-79.3434
	60	550	0	24	210.155033071882	95.3205	351.3321	198.904	357.4879	372.291	289.0875	212.0209	343.8032	86.74791
	70	550	0	24	48.0414085667229	270.2372	100.5341	296.1483	74.70354	424.7095	129.9334	141.2776	50.08176	252.8392
	50	600	0	24	218.228741275294	100.5477	266.8892	214.7295	144.0868	348.0883	109.6073	37.48062	416.1399	96.40499
	60	600	0	24	456.268853242045	275.4644	376.4866	311.9739	430.9651	418.9335	554.5381	360.1513	421.0642	262.4963
	70	600	0	24	634.704760584719	450.3812	211.4053	409.2182	157.8716	371.4003	191.1547	141.2776	153.1464	428.5876
	50	650	0	24	645.348608594549	280.6916	200.3932	327.7995	105.1888	497.8354	258.4156	198.1278	72.27044	272.1534
	60	650	0	24	649.097485750898	455.6083	231.1874	425.0438	499.8105	473.7819	453.7271	198.1278	266.8663	438.2447
	70	650	0	24	649.959895115519	630.5251	34.70011	522.2882	80.90224	490.7305	233.8256	198.1278	-181.669	604.336
	50	550	3	24	650.751792308207	-56.3127	102.2036	101.7515	225.3794	335.2127	24.31096	308.9212	250.0203	-53.9686
	60	550	3	24	652.399440820105	118.604	372.3331	198.9958	334.9693	381.9341	389.3441	212.0209	327.846	112.1227
	70	550	3	24	653.472938623528	293.5207	112.1569	296.2402	117.789	384.9004	-31.4394	141.2776	-32.909	278.214
	50	600	3	24	0.0	123.8312	40.80068	214.8214	76.80978	325.8507	61.9099	37.48062	78.95291	121.7798
	60	600	3	24	306.939787423268	298.7479	337.2376	312.0657	347.7027	428.54	294.2821	360.1513	276.5008	287.8711
	70	600	3	24	676.59085914709	473.6647	-65.5412	409.3101	93.41049	350.2916	119.2327	141.2776	-58.4509	453.9624
	50	650	3	24	803.290593065416	303.9751	174.2205	327.8913	84.3044	446.1481	146.4924	198.1278	41.90186	297.5282
	60	650	3	24	825.292948219714	478.8919	440.7709	425.1356	417.3509	499.8265	384.7927	198.1278	429.1216	463.6195
	70	650	3	24	838.709199606747	653.8086	-53.6388	522.38	-4.57986	453.2857	-28.4384	198.1278	-86.4473	629.7108
	50	550	6	24	849.573218278952	-33.0292	172.6592	101.8433	211.0541	312.9868	266.6001	308.9212	318.8943	-28.5938
	60	550	6	24	854.463881224112	141.8875	386.2314	199.0877	345.8674	401.6835	429.4269	212.0209	429.411	137.4975
	70	550	6	24	858.047483587646	316.8043	224.4503	296.332	179.1414	367.7695	140.0125	141.2776	266.4711	303.5888
	50	600	6	24	860.608977435635	147.1147	81.42084	214.9132	69.11669	306.2916	-4.34598	37.48062	34.22618	147.1546
	60	600	6	24	861.856104336131	322.0315	381.7665	312.1576	312.452	401.8608	303.3561	360.1513	264.4647	313.2459
	70	600	6	24	215.621593796898	496.9482	33.6081	409.4019	89.38808	347.4011	159.6811	141.2776	127.328	479.3372
	50	650	6	24	316.676408394745	327.2587	-47.9841	327.9831	87.83159	398.9489	91.82432	198.1278	-24.3022	322.903
	60	650	6	24	370.3108914708	502.1754	451.0646	425.2275	374.5399	532.3302	361.6832	198.1278	395.6078	488.9943
	70	650	6	24	411.729554083952	677.0921	-2.74945	522.4718	-6.85266	477.0974	117.3093	198.1278	77.85437	655.0856
	50	550	9	24	437.076802046351	-9.74567	347.0461	101.9352	208.9046	276.4853	312.8173	308.9212	333.6475	-3.21896
	60	550	9	24	458.064292452651	165.1711	154.5623	199.1795	334.4053	383.7878	180.391	212.0209	128.7362	162.8723
	70	550	9	24	472.026333930492	340.0878	273.1842	296.4239	209.0543	366.9992	294.9889	141.2776	157.3269	328.9637
	50	600	9	24	497.280862192983	170.3982	130.672	215.0051	75.7097	300.2014	194.9502	37.48062	209.5956	172.5294
	60	600	9	24	508.843781435699	345.315	76.37658	312.2494	288.4499	379.9681	210.7811	360.1513	124.406	338.6207
	70	600	9	24	0	520.2317	191.407	409.4938	116.7039	387.6109	136.3246	141.2776	178.7998	504.7121
	50	650	9	24	29.6189140250882	350.5422	210.5851	328.075	87.96243	367.4036	243.3902	198.1278	224.872	348.2778
	60	650	9	24	329.756731160315	525.4589	261.8511	425.3193	354.8722	556.343	97.32511	198.1278	329.3532	514.3691
	70	650	9	24	565.733345665566	700.3756	131.7794	522.5637	63.46124	526.9126	240.799	198.1278	203.1311	680.4604
	50	550	12	24	708.822516946481	13.53785	122.3996	102.027	161.9548	283.0975	142.3445	159.4967	-103.402	22.15585
	60	550	12	24	797.130511893989	188.4546	349.2373	199.2714	251.3619	335.4001	403.1411	212.0209	94.26451	188.2472
	70	550	12	24	802.649641659692	363.3713	-53.5161	296.5157	165.9626	375.4049	-8.03551	141.2776	180.1031	354.3385
	50	600	12	24	805.45429590444	193.6818	-99.1256	215.0969	53.52078	285.8627	136.33	37.48062	9.802111	197.9042
	60	600	12	24	807.036740637368	368.5985	416.2883	312.3413	241.4727	381.3904	379.3812	360.1513	327.1902	363.9956
	70	600	12	24	807.545674817917	543.5152	215.9689	409.5856	145.8337	455.6585	125.371	141.2776	438.8326	530.0869
	50	650	12	24	0	373.8257	-47.5356	328.1668	62.4751	386.3532	-85.3145	198.1278	-152.924	373.6526
	60	650	12	24	301.356707935662	548.7424	372.3987	425.4112	343.0266	547.0977	150.5484	198.1278	354.1352	539.744
	70	650	12	24	736.971150116012	723.6591	355.2281	522.6555	189.617	591.6472	315.4191	198.1278	285.1609	705.8353
	50	550	15	24	1025.19060457032	36.82137	181.762	102.1189	29.28891	305.1274	85.29767	159.4967	-52.4184	47.53066
	60	550	15	24	1068.70759520231	211.7381	47.14834	199.3632	67.05414	311.227	0.817774	212.0209	-142.847	213.622
	70	550	15	24	1088.86798657064	386.6548	8.465529	296.6076	26.98351	411.7698	46.42961	141.2776	152.9679	379.7133
	50	600	15	24	1102.14199680528	216.9653	52.21846	215.1888	-27.0748	293.0812	128.806	37.48062	-54.2029	223.2791
	60	600	15	24	1108.67028586516	391.882	194.5005	312.4331	149.0386	374.8643	217.2725	360.1513	-24.91	389.3704
	70	600	15	24	1112.88089278016	566.7987	43.80209	409.6775	154.2588	486.5949	124.0238	141.2776	296.7083	555.4617
	50	650	15	24	1116.5085163797	397.1092	37.03214	328.2587	0.575705	446.9653	206.9612	198.1278	313.5951	399.0275
	60	650	15	24	1120.64558292764	572.0259	240.6739	425.503	329.0934	520.3553	348.8861	198.1278	532.5604	565.1188
	70	650	15	24	128.203544213324	746.9427	581.4159	522.7474	352.4012	661.726	366.7628	198.1278	673.5614	731.2101
	50	550	0	48	218.677177567483	-17.2588	441.7551	149.4147	391.9652	372.5239	465.8266	308.9212	605.4501	-16.0608
	60	550	0	48	293.814601375023	157.6579	503.6657	246.6591	446.9101	420.1607	379.0826	547.2238	555.0286	150.0305
	70	550	0	48	346.016436310135	332.5746	236.7785	343.9034	203.2512	435.7665	243.1126	281.6504	211.876	316.1218
	50	600	0	48	393.127550662789	162.8851	376.3408	262.4846	258.1813	375.7043	239.0038	213.335	565.0349	159.6876
	60	600	0	48	442.097490469853	337.8018	525.093	359.729	532.7106	467.253	656.7371	547.2238	634.3351	325.7789
	70	600	0	48	526.755727580465	512.7186	343.9224	456.9733	259.4923	382.2857	278.8328	281.6504	316.9864	491.8702
	50	650	0	48	591.934798063143	343.029	354.3374	375.5545	292.303	500.6672	440.1354	355.2708	308.426	335.436
	60	650	0	48	636.166640002676	517.9457	424.2863	472.7989	674.0976	544.7065	622.1504	573.7116	567.3978	501.5273
	70	650	0	48	0	692.8625	211.7098	570.0432	221.1582	501.2575	297.1288	301.1116	69.43234	667.6186
	50	550	3	48	214.848145538905	6.024695	230.2138	149.5066	317.9609	355.9088	111.0931	308.9212	386.1515	9.314029
	60	550	3	48	283.770262628652	180.9414	539.498	246.7509	425.7407	408.9473	489.2543	547.2238	528.3541	175.4053
	70	550	3	48	499.070221235927	355.8582	263.2326	343.9953	249.7674	420.1203	110.8241	281.6504	118.1679	341.4967
	50	600	3	48	523.807706176711	186.1686	165.0836	262.5765	195.7731	344.8753	180.6411	213.335	217.1304	185.0624
	60	600	3	48	530.877477543764	361.0853	500.6752	359.8208	456.2745	428.54	419.4744	547.2238	479.0553	351.1537
	70	600	3	48	532.466017758668	536.0021	81.80713	457.0652	215.1585	379.5693	206.7375	281.6504	94.67182	517.245
	50	650	3	48	533.259328602704	366.3125	342.9959	375.6464	285.2819	486.7905	371.0837	355.2708	267.3404	360.8108
	60	650	3	48	537.020120820416	541.2293	648.701	472.8907	621.5191	545.2859	626.7423	573.7116	718.9355	526.9021
	70	650	3	48	539.479192584247	716.146	138.202	570.1351	189.7395	503.8276	85.12527	301.1116	153.9368	692.9934
	50	550	6	48	0	29.30821	286.1182	149.5984	313.5965	333.3669	323.6857	308.9212	407.6308	34.68884
	60	550	6	48	313.780591716363	204.2249	538.845	246.8427	435.1767	406.0503	544.1782	547.2238	582.5243	200.7802
	70	550	6	48	550.476816411467	379.1417	372.8592	344.0871	309.7978	415.9361	284.0288	281.6504	370.1529	366.8715
	50	600	6	48	984.214836045449	209.4521	191.1525	262.6683	193.1908	306.2916	116.3365	213.335	125.0086	210.4372
	60	600	6	48	1195.94424362973	384.3689	530.6528	359.9127	429.5436	427.7167	420.4012	547.2238	419.6241	376.5285
	70	600	6	48	1299.35635289039	559.2856	178.2897	457.157	234.5677	385.5231	265.7787	281.6504	233.0556	542.6199
	50	650	6	48	1320.14777619686	389.5961	133.0344	375.7382	302.2783	460.132	324.0014	355.2708	153.7415	386.1856
	60	650	6	48	1330.37427312883	564.5128	671.2378	472.9826	612.518	546.819	678.6469	573.7116	638.0272	552.2769
	70	650	6	48	1338.95239163829	739.4295	213.219	570.2269	250.2435	523.8719	266.8206	301.1116	270.8431	718.3683
	50	550	9	48	1346.24122814848	52.59173	535.3221	149.6902	319.5601	314.8283	379.9612	308.9212	464.3734	60.06366
	60	550	9	48	1353.18531157772	227.5085	327.9349	246.9346	419.4935	383.7878	280.5928	337.0773	323.8385	226.155
	70	550	9	48	149.053764755189	402.4252	439.1433	344.1789	334.0469	417.332	404.8663	281.6504	302.9977	392.2463
	50	600	9	48	275.082407021121	232.7357	315.2207	262.7601	205.2236	300.2014	296.6154	213.335	342.3674	235.8121
	60	600	9	48	369.275427109379	407.6524	246.0219	360.0045	416.1325	399.4361	344.1499	337.0773	321.5545	401.9034
	70	600	9	48	589.924344744718	582.5691	353.6388	457.2488	288.2655	441.7233	309.0308	281.6504	326.5167	567.9947
	50	650	9	48	683.19042988286	412.8796	466.4207	375.8301	315.8217	435.4487	482.5081	355.2708	444.9044	411.5604
	60	650	9	48	759.634614258742	587.7963	502.7833	473.0744	630.0266	580.5882	440.8726	573.7116	613.7626	577.6518
	70	650	9	48	887.739260285527	762.713	365.2981	570.3188	389.6682	603.0209	414.5231	301.1116	438.1094	743.7431
	50	550	12	48	958.015219954028	75.87525	230.0183	149.7821	278.0509	301.5793	201.3287	159.4967	36.6899	85.43847
	60	550	12	48	1024.21645718581	250.792	496.0107	247.0264	330.0871	367.2768	504.6302	568.092	298.7331	251.5298
	70	550	12	48	0	425.7087	85.84381	344.2708	282.0718	423.9161	168.0604	281.6504	335.1408	417.6211
	50	600	12	48	171.41280756306	256.0192	72.75291	262.852	188.9437	314.0661	159.3587	213.335	151.9402	261.1869
	60	600	12	48	453.817005051932	430.9359	627.3214	360.0963	382.0107	381.3904	523.3427	568.092	533.7058	427.2782
	70	600	12	48	717.270551405897	605.8526	419.5885	457.3407	345.9744	537.9085	371.8924	281.6504	595.9161	593.3695
	50	650	12	48	766.225207798067	436.1631	195.6297	375.9219	303.9819	418.6771	131.0837	355.2708	76.47459	436.9353
	60	650	12	48	798.706066601386	611.0798	654.7187	473.1662	657.554	647.4931	441.2052	615.8236	647.9113	603.0266
	70	650	12	48	809.429211997723	785.9966	630.1345	570.4106	587.7562	702.8747	591.7365	615.8236	529.5054	769.1179
	50	550	15	48	839.503565384739	99.15877	289.3808	149.8739	147.8358	307.4678	199.8036	159.4967	64.16119	110.8133
	60	550	15	48	844.180454163582	274.0755	193.9218	247.1183	138.3363	347.4382	79.74887	265.9246	38.10866	276.9046
	70	550	15	48	846.555596816629	448.9922	147.8255	344.3626	132.5858	423.4675	231.3434	281.6504	284.4924	442.9959
	50	600	15	48	0	279.3027	213.9726	262.9438	114.8255	319.2362	195.4723	213.335	64.42242	286.5617
	60	600	15	48	155.600978500613	454.2194	395.4094	360.1882	304.5428	424.1703	392.1227	265.9246	158.0917	452.653
	70	600	15	48	330.807590174825	629.1362	237.2974	457.4325	383.9439	539.8251	316.8208	281.6504	430.2789	618.7443
	50	650	15	48	658.946469704424	459.4466	362.0998	376.0137	255.9959	454.9562	421.5325	355.2708	519.4815	462.3101
	60	650	15	48	987.421164409991	634.3633	604.8962	473.2581	683.3335	605.3079	671.3796	615.8236	802.8222	628.4014
	70	650	15	48	1300.71232217383	809.2801	938.2247	570.5024	820.8508	760.3257	753.0725	615.8236	894.3928	794.4927
	50	550	0	72	1370.85786635754	45.07858	439.5	197.1698	441.0516	387.8925	539.8234	505.5703	630.9174	47.22184
	60	550	0	72	1404.14608143798	219.9953	540.7627	294.4141	506.542	454.3801	438.0605	547.2238	595.4984	213.3131
	70	550	0	72	1432.02951882511	394.912	304.2521	391.6585	314.6606	466.7065	353.2171	394.2052	275.485	379.4045
	50	600	0	72	1459.38703261098	225.2225	364.7376	310.2397	333.1978	390.7897	336.2761	505.5703	605.1358	222.9702
	60	600	0	72	1491.76974429527	400.1392	552.8418	407.484	597.1173	485.705	725.6036	547.2238	689.4388	389.0615
	70	600	0	72	140.790662427419	575.056	402.0479	504.7284	338.1739	413.6478	377.2683	394.2052	395.2291	555.1529
	50	650	0	72	399.242698243766	405.3664	506.0237	423.3096	431.8164	549.8127	565.7865	537.2966	504.5266	398.7186
	60	650	0	72	634.369820924877	580.2832	613.9942	520.5539	802.2371	612.435	759.7252	838.3956	778.5015	564.8099
	70	650	0	72	886.005443770197	755.1999	349.915	617.7983	332.3294	530.3874	370.3608	522.2173	303.675	730.9012
	50	550	3	72	1000.8846077832	68.3621	306.8212	197.2616	377.9692	365.1898	165.5026	169.6779	404.8955	72.59665
	60	550	3	72	1065.38404608112	243.2788	578.1009	294.506	487.2924	426.4173	556.8358	547.2238	562.0999	238.688
	70	550	3	72	1108.77129713809	418.1956	332.2121	391.7503	365.8566	462.5839	264.7302	394.2052	175.0525	404.7793
	50	600	3	72	1158.86628111235	248.506	232.3429	310.3315	273.3974	363.7682	257.8623	295.2206	250.5075	248.345
	60	600	3	72	1211.13269256048	423.4228	529.93	407.5759	526.5904	512.1583	505.5425	547.2238	527.4338	414.4364
	70	600	3	72	0	598.3395	141.4386	504.8202	314.7859	394.1545	296.0759	394.2052	166.19	580.5277
	50	650	3	72	40.7155382221815	428.6499	597.1162	423.4014	434.2472	525.8338	534.6255	537.2966	456.7177	424.0934
	60	650	3	72	201.029831023847	603.5667	863.4864	520.6458	777.2053	611.184	834.5567	838.3956	923.3151	590.1848
	70	650	3	72	269.704222089176	778.4834	301.4847	617.8901	355.0188	541.152	214.0011	522.2173	381.4554	756.2761
	50	550	6	72	283.424806015172	91.64562	331.9605	197.3535	383.1142	342.9386	360.3238	360.196	449.0694	97.97146
	60	550	6	72	292.882215405807	266.5624	572.9974	294.5978	495.0075	444.1963	624.2214	547.2238	638.9653	264.0628
	70	550	6	72	296.749399556144	441.4791	437.3882	391.8422	424.6672	437.5942	448.4803	394.2052	449.7327	430.1541
	50	600	6	72	300.187755094405	271.7895	227.6467	310.4234	273.181	338.156	192.5944	271.1205	181.0806	273.7199
	60	600	6	72	302.121347169574	446.7063	555.4571	407.6677	506.7193	522.5505	491.4571	547.2238	490.6976	439.8112
	70	600	6	72	302.764590087687	621.623	233.4706	504.9121	357.1401	435.4551	372.0236	394.2052	327.2685	605.9025
	50	650	6	72	0	451.9335	374.5552	423.4933	460.4443	481.3809	489.6068	537.2966	365.8126	449.4683
	60	650	6	72	91.4636950202561	626.8502	899.7383	520.7376	799.3787	643.0411	954.2018	838.3956	865.1017	615.5596
	70	650	6	72	529.046807907582	801.7669	390.2168	617.982	477.2281	586.9964	436.4977	522.2173	521.056	781.6509
	50	550	9	72	720.335519820368	114.9291	568.4275	197.4453	396.6218	321.9048	436.8889	571.6422	506.1801	123.3463
	60	550	9	72	895.487845438693	289.8459	349.3503	294.6897	474.6084	414.6161	345.9104	337.0773	380.6473	289.4376
	70	550	9	72	1065.26942277973	464.7626	563.9637	391.934	442.67	457.588	510.438	394.2052	382.9464	455.5289
	50	600	9	72	1085.84919883152	295.0731	385.1994	310.5152	288.1532	314.1022	359.194	420.1771	398.8078	299.0947
	60	600	9	72	1098.98134106422	469.9898	304.3106	407.7596	502.0835	510.0091	430.3398	337.0773	392.9965	465.186
	70	600	9	72	1116.51095645577	644.9065	557.3813	505.0039	435.8218	497.3402	485.1812	394.2052	421.0986	631.2773
	50	650	9	72	1128.69709055588	475.217	741.4259	423.5851	483.9657	456.6495	654.8863	537.2966	657.3441	474.8431
	60	650	9	72	1141.62701044917	650.1337	764.7682	520.8295	851.6266	675.7763	748.8548	838.3956	841.2045	640.9344
	70	650	9	72	252.867226027376	825.0504	690.8575	618.0738	683.8629	697.6817	609.7566	522.2173	688.6895	807.0257
	50	550	12	72	597.469005151412	138.2127	245.6457	197.5372	360.5725	297.2079	246.5905	219.1158	59.46128	148.7211
	60	550	12	72	904.565665662588	313.1294	533.3444	294.7815	378.767	385.5499	566.3282	568.092	336.5067	314.8124
	70	550	12	72	1247.26282761768	488.0461	198.5036	392.0259	381.1157	462.3724	324.3327	394.2052	396.0543	480.9037
	50	600	12	72	1397.89677166137	318.3566	77.0257	310.6071	276.2679	324.5668	154.8918	219.1158	189.3455	324.4695
	60	600	12	72	1701.52293380498	493.2733	653.3005	407.8514	479.4976	470.0177	617.3576	568.092	586.1128	490.5608
	70	600	12	72	1830.30096443085	668.19	562.9426	505.0958	520.343	590.5237	623.1163	394.2052	671.4615	656.6521
	50	650	12	72	1902.12638298662	498.5005	419.7552	423.677	483.8046	473.5538	284.7502	537.2966	269.8789	500.2179
	60	650	12	72	1963.39404111308	673.4172	899.2201	520.9213	916.8143	711.2504	698.9178	838.3956	856.3183	666.3092
	70	650	12	72	0	848.334	947.9644	618.1657	951.5879	804.504	891.3914	522.2173	761.0507	832.4005
	50	550	15	72	232.184066825635	161.4962	325.2465	197.629	233.9998	307.5133	288.6798	418.915	152.6573	174.0959
	60	550	15	72	432.83796340216	336.4129	251.4938	294.8733	180.4808	358.5096	123.0265	265.9246	141.6065	340.1872
	70	550	15	72	608.922951476236	511.3296	307.0716	392.1177	220.8501	461.989	394.245	394.2052	411.1304	506.2785
	50	600	15	72	638.584998545475	341.6401	213.2869	310.6989	208.6852	335.5763	230.2878	215.3406	167.5522	349.8443
	60	600	15	72	656.192645301261	516.5568	416.4299	407.9433	416.738	455.2881	518.0338	265.9246	276.2236	515.9356
	70	600	15	72	656.835944275403	691.4736	402.0409	505.1876	586.2869	664.9522	500.5795	394.2052	571.5494	682.0269
	50	650	15	72	657.800892736613	521.784	562.3925	423.7688	449.6718	492.4445	572.4858	915.0829	778.6106	525.5927
	60	650	15	72	659.191867008514	696.7008	825.5648	521.0132	981.759	717.1427	962.0184	915.0829	1076.954	691.684
	70	650	15	72	660.687217604033	871.6175	1324.438	618.2575	1252.79	845.325	1175.882	915.0829	1191.663	857.7753
	50	550	0	96	0	107.416	446.8061	244.9248	462.1847	373.6394	581.5473	505.5703	578.9222	110.5045
	60	550	0	96	295.674454945198	282.3327	607.3417	342.1692	541.3483	489.1552	469.4433	528.7485	589.423	276.5958
	70	550	0	96	630.979176598153	457.2494	416.8583	439.4135	412.0471	486.8727	444.8412	528.7485	335.6568	442.6871
	50	600	0	96	939.022265478418	287.5599	521.3916	357.9947	374.6092	415.0117	405.7849	505.5703	543.4329	286.2529
	60	600	0	96	1243.37581007366	462.4766	748.6715	455.2391	630.2271	551.6717	758.6228	528.7485	673.6555	452.3442
	70	600	0	96	1422.08953640177	637.3934	502.2408	552.4834	399.0328	447.7354	468.309	528.7485	445.6925	618.4355
	50	650	0	96	1449.03139639015	467.7038	690.1218	471.0647	527.3838	546.8823	636.9028	650.1717	540.079	462.0012
	60	650	0	96	1471.64589767152	642.6206	978.2245	568.309	888.3362	677.0354	848.0054	849.7931	859.973	628.0926
	70	650	0	96	1488.05810460491	817.5373	572.9156	665.5534	418.4086	573.3847	434.2009	418.873	451.3934	794.1839
	50	550	3	96	1501.16659828379	130.6995	246.1588	245.0167	410.3051	396.205	194.8715	169.6779	404.9586	135.8793
	60	550	3	96	1515.71056795951	305.6162	576.7113	342.261	524.8605	478.2739	594.8414	528.7485	608.0828	301.9706
	70	550	3	96	316.241089403676	480.533	425.7071	439.5054	469.3726	515.0484	415.4418	528.7485	287.2824	468.0619
	50	600	3	96	750.787416306699	310.8434	221.6732	358.0866	315.2708	386.8562	299.9841	295.2206	240.863	311.6277
	60	600	3	96	1185.33374320972	485.7602	558.436	455.3309	564.7276	592.8358	549.8609	528.7485	563.7094	477.719
	70	600	3	96	1619.88007011275	660.6769	90.86807	552.5753	397.0054	463.4098	368.8618	528.7485	268.7122	643.8103
	50	650	3	96	1946.44163478037	490.9874	539.6567	471.1565	534.6511	584.0602	636.6531	788.1066	544.3279	487.3761
	60	650	3	96	2380.9879616834	665.9041	986.1591	568.4008	887.7722	713.0047	986.3788	1102.632	1056.845	653.4674
	70	650	3	96	2647.36486007495	840.8208	299.488	665.6452	493.7214	611.2662	336.3017	418.873	581.2316	819.5587
	50	550	6	96	2927.32133118223	153.983	315.833	245.1085	424.3325	378.1107	382.2968	360.196	445.2118	161.2541
	60	550	6	96	3209.34189734229	328.8998	616.1428	342.3529	530.7586	483.7201	670.9692	528.7485	681.0267	327.3454
	70	550	6	96	0	503.8165	517.0103	439.5972	527.2106	519.0675	618.8738	528.7485	558.041	493.4367
	50	600	6	96	15.3355173023752	334.1269	261.5119	358.1784	314.5776	375.1628	233.6128	271.1205	167.5148	337.0025
	60	600	6	96	306.006162557689	509.0437	628.4981	455.4228	549.8122	576.9647	516.6352	528.7485	523.0518	503.0938
	70	600	6	96	432.965453795645	683.9604	248.1716	552.6671	461.096	520.322	460.949	528.7485	425.8693	669.1851
	50	650	6	96	450.972217696291	514.2709	459.2466	471.2483	565.3576	580.8389	586.25	532.8183	449.5021	512.7509
	60	650	6	96	461.095248973201	689.1876	1164.562	568.4927	937.3824	740.3833	1162.864	1312.029	994.7101	678.8422
	70	650	6	96	467.312207748641	864.1043	551.1075	665.737	674.558	700.6373	601.433	817.1201	716.9111	844.9335
	50	550	9	96	471.941621300707	177.2665	479.1298	245.2004	444.5107	355.5833	485.4407	571.6422	539.127	186.6289
	60	550	9	96	475.338499048792	352.1833	325.0598	342.4447	505.1781	454.6441	378.6583	528.7485	459.5139	352.7202
	70	550	9	96	477.649891787011	527.1	612.5822	439.6891	538.4426	541.3417	599.3201	528.7485	528.0587	518.8115
	50	600	9	96	0	357.4105	343.8484	358.2703	329.6611	329.4009	394.2486	420.1771	422.0467	362.3773
	60	600	9	96	422.00013099135	532.3272	307.8696	455.5146	551.5918	573.355	468.4594	528.7485	462.1552	528.4686
	70	600	9	96	715.137264054058	707.2439	599.9664	552.759	562.3292	601.3277	645.1096	528.7485	556.5031	694.5599
	50	650	9	96	748.07171117031	537.5544	734.1629	471.3402	594.7688	540.491	755.0741	817.4334	777.838	538.1257
	60	650	9	96	767.362853080725	712.4711	943.3715	568.5845	1020.494	781.7506	993.1459	1014.775	1007.619	704.217
	70	650	9	96	775.608926837766	887.3879	828.0706	665.8289	944.0996	829.8265	799.9663	1014.775	921.3499	870.3083
	50	550	12	96	778.884549213762	200.5501	201.5581	245.2922	413.5226	333.8913	279.3942	219.1158	98.13411	212.0037
	60	550	12	96	781.738171458766	375.4668	520.9684	342.5366	402.7033	433.9782	592.5972	528.7485	421.0993	378.095
	70	550	12	96	783.218586157778	550.3835	306.1099	439.7809	466.5513	511.0178	447.1907	528.7485	546.8915	544.1863
	50	600	12	96	784.373965157192	380.694	133.1995	358.3621	320.0976	344.0993	134.7488	219.1158	218.3105	387.7521
	60	600	12	96	785.114172506698	555.6107	721.0887	455.6065	538.3833	566.0459	657.1771	528.7485	660.9973	553.8434
	70	600	12	96	121.532097091956	730.5274	736.5218	552.8508	670.5877	714.5201	856.4769	528.7485	812.593	719.9347
	50	650	12	96	267.054365207558	560.8379	411.5559	471.432	603.442	551.2669	369.1348	296.355	396.0991	563.5005
	60	650	12	96	399.387284047708	735.7546	973.902	568.6764	1119.915	823.1796	897.8676	1014.775	1028.457	729.5918
	70	650	12	96	480.004224450663	910.6714	1128.231	665.9207	1276.5	946.4388	1186.58	1014.775	999.4364	895.6831
	50	550	15	96	551.24369819817	223.8336	390.9194	245.3841	291.2696	302.7386	353.6222	418.915	210.5646	237.3785
	60	550	15	96	625.760578023454	398.7503	328.8036	342.6284	198.493	376.652	138.0457	410.7126	245.4337	403.4698
	70	550	15	96	689.186833710708	573.667	469.5124	439.8728	295.026	500.8111	522.4922	410.7126	581.2034	569.5611
	50	600	15	96	732.553316228236	403.9775	379.2211	358.454	258.339	331.7959	241.8534	215.3406	215.7515	413.1269
	60	600	15	96	784.1068520722	578.8942	573.9038	455.6983	488.9762	542.0582	587.5889	410.7126	370.3421	579.2182
	70	600	15	96	0	753.811	656.2928	552.9427	761.4243	752.0822	654.7597	410.7126	731.9156	745.3095
	50	650	15	96	51.3805065620094	584.1214	708.5441	471.5239	582.0374	535.664	652.0504	654.8823	924.065	588.8753
	60	650	15	96	175.860427627021	759.0382	1034.523	568.7682	1221.584	837.6743	1191.463	1441.583	1268.328	754.9666
	70	650	15	96	261.755602095445	933.9549	1629.968	666.0126	1640.853	947.4885	1604.569	2455.223	1449.285	921.0579
	50	550	0	120	281.945675307026	169.7534	491.2588	292.6799	461.7887	402.2439	597.5401	505.5703	533.2908	173.7871
	60	550	0	120	291.103193534504	344.6701	528.7084	389.9243	557.6251	529.4421	483.2847	494.3938	580.4439	339.8784
	70	550	0	120	299.19093852893	519.5869	535.7939	487.1686	499.3001	553.8014	514.5035	610.5147	423.9855	505.9697
	50	600	0	120	306.352338979904	349.8973	505.6935	405.7498	389.9164	433.8789	454.7171	505.5703	500.7298	349.5355
	60	600	0	120	311.873091611502	524.814	631.253	502.9942	639.9303	605.251	763.6516	781.4897	667.6048	515.6268
	70	600	0	120	314.323655604751	699.7308	567.8257	600.2385	448.3088	500.0951	542.1656	504.9449	536.9497	681.7181
	50	650	0	120	0	530.0412	635.0783	518.8197	585.4137	605.7941	667.6486	650.1717	543.8547	525.2839
	60	650	0	120	295.378871472204	704.958	870.0864	616.0641	939.0524	755.0832	884.734	849.7931	900.401	691.3752
	70	650	0	120	451.1978282752	879.8747	282.965	713.3084	485.0406	638.0808	473.2932	418.873	589.1298	857.4665
	50	550	3	120	476.037445806646	193.0369	316.4581	292.7718	421.377	408.6058	206.6574	169.6779	349.1704	199.1619
	60	550	3	120	494.694818704151	367.9536	589.2678	390.0161	544.9826	524.4637	612.4583	669.555	588.9467	365.2532
	70	550	3	120	505.420203774408	542.8704	628.6727	487.2605	564.3146	584.0331	558.8934	610.5147	365.4553	531.3445
	50	600	3	120	512.622567807607	373.1808	243.7729	405.8417	329.1732	420.874	316.5571	295.2206	188.0039	374.9103
	60	600	3	120	516.269528739373	548.0976	544.1585	503.086	578.7005	627.2416	560.9269	516.145	547.5015	541.0016
	70	600	3	120	518.025680848454	723.0143	252.4342	600.3304	467.6451	532.9753	416.4418	504.9449	349.8141	707.0929
	50	650	3	120	519.202684682627	553.3248	668.5559	518.9116	592.9896	631.2218	690.624	788.1066	537.9468	550.6587
	60	650	3	120	519.929277724557	728.2415	1127.307	616.1559	959.3373	796.7987	1076.84	1102.632	1087.118	716.75
	70	650	3	120	114.758399912194	903.1582	231.4363	713.4003	610.0521	666.7389	432.6622	418.873	708.8117	882.8413
	50	550	6	120	159.829368771146	216.3204	362.6451	292.8636	443.5363	394.9004	394.6056	360.196	462.7605	224.5367
	60	550	6	120	225.664605358869	391.2372	542.1534	390.1079	549.1455	523.224	692.227	669.555	735.2288	390.628
	70	550	6	120	291.709774800468	566.1539	783.1081	487.3523	621.5466	596.4459	790.3928	755.5951	709.5518	556.7193
	50	600	6	120	314.919833679984	396.4644	260.1244	405.9335	325.2452	407.7792	252.1009	271.1205	187.9927	400.2851
	60	600	6	120	328.750444983206	571.3811	558.6345	503.1779	566.7198	616.2059	508.4003	516.145	580.1821	566.3764
	70	600	6	120	344.129861606976	746.2978	444.1748	600.4222	551.6029	618.8152	525.8077	675.0426	580.3088	732.4677
	50	650	6	120	356.752257953978	576.6083	543.0212	519.0034	623.3723	653.0997	627.0379	532.8183	516.4592	576.0335
	60	650	6	120	360.699876443986	751.525	1427.71	616.2478	1031.763	828.9122	1296.1	1312.029	1098.318	742.1248
	70	650	6	120	0	926.4417	659.4715	713.4921	844.5757	806.8332	737.7341	817.1201	917.8292	908.2161
	50	550	9	120	20.7100098565125	239.604	549.4949	292.9554	469.27	373.4802	526.9766	571.6422	544.8729	249.9115
	60	550	9	120	174.346409669179	414.5207	345.194	390.1998	517.9899	493.6315	387.8474	390.3638	501.9106	416.0028
	70	550	9	120	185.096181347315	589.4374	860.6941	487.4441	625.5688	633.6621	669.8935	755.5951	667.7658	582.0941
	50	600	9	120	198.756277309002	419.7479	354.5874	406.0253	337.4555	357.0019	416.6517	420.1771	430.7202	425.6599
	60	600	9	120	286.96237555816	594.6646	375.1693	503.2697	572.1531	622.1939	470.5921	390.3638	507.4811	591.7512
	70	600	9	120	299.026245962668	769.5813	1008.062	600.514	672.0367	713.6554	780.1951	675.0426	699.1387	757.8425
	50	650	9	120	305.212096930164	599.8918	894.7962	519.0953	654.1682	629.9092	794.5024	817.4334	832.9912	601.4083
	60	650	9	120	309.722938777225	774.8085	1659.244	616.3396	1140.633	888.8204	1162.446	1208.491	1099.424	767.4996
	70	650	9	120	313.067238550837	949.7253	1465.356	713.584	1170.501	985.2699	958.3879	1208.491	1110.463	933.5909
	50	550	12	120	0	262.8875	152.3429	293.0473	442.573	350.3086	301.1015	219.1158	146.958	275.2863
	60	550	12	120	441.417256138851	437.8042	452.6437	390.2916	408.6021	463.9902	594.5457	621.3246	506.5752	441.3776
	70	550	12	120	458.708928268751	612.7209	579.9351	487.536	542.5813	578.045	534.2996	621.584	729.6771	607.469
	50	600	12	120	482.766668069106	443.0314	78.37314	406.1172	327.7114	369.1975	113.8807	219.1158	270.0622	451.0347
	60	600	12	120	497.25953508514	617.9481	732.5789	503.3615	565.4541	629.6487	652.5187	621.3246	749.4021	617.126
	70	600	12	120	507.343222947661	792.8649	1151.09	600.6059	799.7944	828.3865	1060.589	1065.647	998.307	783.2173
	50	650	12	120	514.557698645278	623.1753	239.8172	519.1871	668.1154	617.7973	395.6557	296.355	494.33	626.7831
	60	650	12	120	517.645122734313	798.092	1327.564	616.4314	1269.314	949.1244	1028.358	1208.491	1163.34	792.8744
	70	650	12	120	519.631999727725	973.0088	1571.123	713.6758	1560.144	1114.916	1447.911	1208.491	1231.629	958.9657
	50	550	15	120	521.030653273477	286.171	441.3598	293.1391	324.8083	322.006	396.9518	418.915	208.8967	300.6611
	60	550	15	120	522.060793318064	461.0877	274.9432	390.3835	198.8056	405.0785	138.5041	117.8748	280.4179	466.7525
	70	550	15	120	173.64244322591	636.0045	612.6242	487.6278	359.1781	567.3177	614.5477	621.584	713.497	632.8438
	50	600	15	120	273.943369397087	466.3149	345.9732	406.209	270.3537	350.4789	243.3897	215.3406	217.0122	476.4095
	60	600	15	120	386.186829446285	641.2316	521.7811	503.4534	527.0325	606.2319	609.2564	545.7128	408.256	642.5009
	70	600	15	120	487.839610944611	816.1484	837.6609	600.6977	911.0758	869.7361	771.1123	1065.647	867.1379	808.5922
	50	650	15	120	572.596497821199	646.4588	739.9112	519.2789	657.3089	575.2759	670.6415	654.8823	971.8047	652.1579
	60	650	15	120	638.653411758119	821.3756	1506.099	616.5233	1403.477	954.0653	1345.153	1441.583	1352.719	818.2492
	70	650	15	120	687.30692107053	996.2923	2021.188	713.7676	1980.114	1122.384	2005.196	2455.223	1630.984	984.3406
	50	550	0	155	726.679962137542	260.6621	447.7867	362.3227	437.4943	422.3718	585.6357	505.5703	514.9044	266.0742
	60	550	0	155	780.502327703918	435.5788	552.8477	459.5671	562.3868	555.1735	495.4567	494.3938	541.002	432.1655
	70	550	0	155	0	610.4956	515.551	556.8114	616.756	653.4581	586.8018	610.5147	457.2102	598.2569
	50	600	0	155	17.2763431161269	440.806	494.9312	475.3926	383.4413	481.1589	500.9494	505.5703	495.7578	441.8226
	60	600	0	155	386.177604277844	615.7228	688.1022	572.637	630.4547	609.825	746.8932	781.4897	641.5768	607.9139
	70	600	0	155	397.778382702377	790.6395	667.796	669.8813	512.9929	588.0925	619.2231	504.9449	583.5887	774.0052
	50	650	0	155	412.7144988744	620.95	764.4576	588.4625	620.2379	662.5092	678.1209	650.1717	569.6357	617.571
	60	650	0	155	422.193632342397	795.8667	812.6226	685.7069	967.1034	793.5723	873.8026	849.7931	905.1262	783.6623
	70	650	0	155	424.538758463758	970.7834	480.6005	782.9512	560.9866	696.0376	484.9635	418.873	666.5217	949.7536
	50	550	3	155	426.53164173145	283.9456	247.7474	362.4146	414.2496	436.8232	202.9262	169.6779	353.6163	291.449
	60	550	3	155	428.101302471957	458.8624	588.1686	459.6589	557.6505	556.2015	623.0824	669.555	572.3372	457.5404
	70	550	3	155	429.381327787107	633.7791	513.012	556.9033	695.7446	690.7082	761.7667	610.5147	421.5123	623.6317
	50	600	3	155	0	464.0896	229.8013	475.4845	318.1789	450.3831	311.3605	295.2206	205.8635	467.1974
	60	600	3	155	302.03997830124	639.0063	597.7984	572.7288	574.4966	606.039	546.0174	516.145	544.306	633.2888
	70	600	3	155	319.860761472394	813.923	351.8561	669.9732	562.6405	629.085	446.8739	504.9449	419.2845	799.3801
	50	650	3	155	369.570189454704	644.2335	757.3321	588.5544	620.9529	687.0618	722.4526	788.1066	586.5597	642.9458
	60	650	3	155	389.836526008544	819.1502	1029.24	685.7987	1010.696	877.9041	1123.512	1102.632	1114.676	809.0371
	70	650	3	155	402.384893027025	994.0669	407.1863	783.0431	750.6199	738.5418	516.91	418.873	809.0359	975.1285
	50	550	6	155	408.763698204566	307.2292	285.6073	362.5064	446.7845	403.2699	399.6601	360.196	460.6387	316.8239
	60	550	6	155	410.95010781196	482.1459	579.462	459.7508	559.7945	565.6814	696.2502	669.555	712.051	482.9152
	70	550	6	155	411.931996701371	657.0626	741.0424	556.9951	752.9112	699.4216	1045.818	755.5951	759.0407	649.0065
	50	600	6	155	412.421803065895	487.3731	189.3362	475.5763	305.162	414.9621	260.8261	271.1205	199.2847	492.5723
	60	600	6	155	413.477883110467	662.2898	602.1928	572.8207	563.2321	638.5481	474.4152	516.145	570.4182	658.6636
	70	600	6	155	168.242054397982	837.2065	540.48	670.065	671.0781	722.9314	589.7019	675.0426	643.2114	824.7549
	50	650	6	155	394.871953644395	667.517	514.6364	588.6462	642.5655	711.8173	628.8211	532.8183	558.5034	668.3206
	60	650	6	155	462.92741798742	842.4337	1232.941	685.8906	1106.905	927.62	1377.319	1312.029	1119.307	834.412
	70	650	6	155	588.753997246848	1017.35	711.5844	783.1349	1051.308	921.4598	865.56	817.1201	1011.485	1000.503
	50	550	9	155	723.481781324545	330.5127	492.9247	362.5982	478.3041	384.0272	573.3428	571.6422	552.78	342.1987
	60	550	9	155	834.856586377452	505.4294	329.8378	459.8426	520.052	534.4657	380.2017	390.3638	488.7628	508.29
	70	550	9	155	964.837636929291	680.3461	557.3661	557.0869	745.8783	760.992	752.0537	755.5951	727.2839	674.3813
	50	600	9	155	1034.99516443621	510.6566	377.6814	475.6682	307.9431	393.7714	450.8589	420.1771	452.0416	517.9471
	60	600	9	155	1098.80476343621	685.5733	427.5847	572.9125	568.6189	645.9226	447.413	390.3638	507.7465	684.0384
	70	600	9	155	0	860.4901	1067.138	670.1569	812.0193	851.0415	943.333	675.0426	772.0709	850.1297
	50	650	9	155	60.4648343026247	690.8005	747.4739	588.7381	667.0677	683.7943	786.3162	817.4334	885.0655	693.6955
	60	650	9	155	158.595115032534	865.7172	1141.62	685.9824	1242.314	1010.057	1294.24	1431.638	1130.444	859.7868
	70	650	9	155	205.408905184094	1040.634	1258.933	783.2268	1443.915	1178.265	1106.656	1136.039	1214.149	1025.878
	50	550	12	155	220.989678089498	353.7962	152.1643	362.6901	455.903	365.5209	312.4607	219.1158	155.391	367.5735
	60	550	12	155	228.923007412892	528.7129	575.1235	459.9344	400.0675	472.0423	578.5526	621.3246	493.9531	533.6648
	70	550	12	155	233.783065016413	703.6297	414.4381	557.1788	645.5264	734.871	609.2834	621.584	789.7216	699.7561
	50	600	12	155	236.641922430249	533.9401	127.2268	475.76	292.9597	407.1307	105.1263	219.1158	291.9095	543.3219
	60	600	12	155	238.35723687855	708.8568	829.0493	573.0043	565.2471	670.813	601.8441	621.3246	750.1938	709.4132
	70	600	12	155	239.643722714776	883.7736	1386.908	670.2487	958.7508	930.1107	1313.085	1065.647	1071.765	875.5045
	50	650	12	155	0	714.084	211.4716	588.8299	681.3622	675.9271	377.2281	296.355	546.9303	719.0703
	60	650	12	155	431.176981661943	889.0008	1064.433	686.0743	1402.205	1055.147	1119.06	1114.333	1194.885	885.1616
	70	650	12	155	564.910727298976	1063.917	1813.855	783.3186	1899.433	1252.977	1735.613	1849.336	1335.84	1051.253
	50	550	15	155	586.572433714153	377.0797	337.6329	362.7819	344.0687	343.2535	423.7271	418.915	267.9787	392.9483
	60	550	15	155	600.159974560902	551.9964	253.431	460.0263	182.3168	439.4822	141.379	117.8748	318.4443	559.0396
	70	550	15	155	608.242911980432	726.9132	360.9014	557.2706	443.6486	652.0079	697.0193	621.584	824.1896	725.1309
	50	600	15	155	614.538774679414	557.2236	169.318	475.8518	238.2933	373.9185	249.3165	215.3406	289.5085	568.6967
	60	600	15	155	617.607855124691	732.1404	390.1101	573.0962	536.9221	669.2854	592.3222	545.7128	459.6963	734.788
	70	600	15	155	619.672407921178	907.0571	812.8341	670.3405	1089.637	982.2134	890.4087	1065.647	991.2438	900.8793
	50	650	15	155	620.933450993861	737.3676	579.5832	588.9217	680.4622	660.1881	634.8762	654.8823	1075.052	744.4451
	60	650	15	155	622.309906385225	912.2843	1123.864	686.1661	1573.017	1093.913	1447.247	1441.583	1434.914	910.5364
	70	650	15	155	156.296130073311	1087.201	2193.135	783.4104	2382.501	1270.812	2494.702	2455.223	1785.845	1076.628
	50	550	0	168	345.838222077784	294.4282	366.8196	388.19	425.1707	431.4131	572.6312	505.5703	473.3119	300.3523
	60	550	0	168	506.128691067667	469.3449	489.9278	485.4344	562.0376	580.6314	502.7569	494.3938	536.0461	466.4436
	70	550	0	168	835.393086498558	644.2617	634.79	582.6787	659.3926	690.2243	608.8985	610.5147	537.7194	632.5349
	50	600	0	168	1131.56736636055	474.5721	467.4382	501.2599	377.1336	489.3611	512.1742	505.5703	463.0503	476.1007
	60	600	0	168	1317.52151504424	649.4889	648.2646	598.5043	624.5692	615.5269	739.8777	781.4897	645.5052	642.192
	70	600	0	168	1496.51802895777	824.4056	703.524	695.7486	538.1594	628.1548	641.0095	504.9449	672.9826	808.2833
	50	650	0	168	1669.68242223612	654.7161	651.1495	614.3299	623.1814	697.3611	680.1448	650.1717	534.2402	651.8491
	60	650	0	168	1693.26338567074	829.6328	822.1819	711.5742	968.6068	817.3834	861.1424	849.7931	906.3665	817.9404
	70	650	0	168	0	1004.55	572.3455	808.8186	586.3906	744.6044	482.4177	529.6112	753.2277	984.0317
	50	550	3	168	59.7165141749303	317.7117	263.0593	388.2819	408.419	441.5815	196.7172	169.6779	322.8975	325.7271
	60	550	3	168	79.0242147751265	492.6285	589.0737	485.5262	560.9789	564.7669	627.1987	669.555	578.2546	491.8184
	70	550	3	168	196.679923656618	667.5452	767.7014	582.7706	744.3292	708.7758	837.9576	610.5147	512.8954	657.9098
	50	600	3	168	206.44169109088	497.8557	281.7878	501.3518	309.7236	459.2381	303.2892	295.2206	184.03	501.4755
	60	600	3	168	213.095634389507	672.7724	559.2893	598.5961	570.4064	649.9911	538.3424	516.145	559.1082	667.5668
	70	600	3	168	218.268083697188	847.6891	376.162	695.8405	598.5919	669.587	451.0923	504.9449	519.553	833.6581
	50	650	3	168	221.786750255872	677.9996	795.5248	614.4217	619.4753	710.1186	729.2562	788.1066	562.0382	677.2239
	60	650	3	168	224.514971138877	852.9163	1076.455	711.666	1018.67	878.2741	1125.982	1102.632	1126.79	843.3152
	70	650	3	168	226.597109179185	1027.833	523.8362	808.9104	797.0811	775.2068	536.2885	529.6112	906.6155	1009.407
	50	550	6	168	0	340.9952	271.9678	388.3737	444.3472	412.9226	397.5246	360.196	453.3507	351.1019
	60	550	6	168	254.190918514023	515.912	599.4105	485.6181	562.614	570.9454	693.6231	669.555	741.3987	517.1933
	70	550	6	168	485.476125149908	690.8287	1171.288	582.8624	801.7368	710.5246	1143.803	1514.259	873.854	683.2846
	50	600	6	168	510.808515321755	521.1392	174.7938	501.4436	292.2412	431.8625	262.3353	271.1205	200.8819	526.8503
	60	600	6	168	526.876350125919	696.0559	575.6257	598.688	558.4132	651.7792	464.6567	516.145	608.6514	692.9417
	70	600	6	168	536.295902909567	870.9726	733.2409	695.9323	714.531	780.0081	610.6746	731.4964	766.91	859.033
	50	650	6	168	541.985830371547	701.2831	467.1192	614.5135	635.5652	680.2361	622.6095	532.8183	557.413	702.5987
	60	650	6	168	546.954051115438	876.1998	1286.685	711.7579	1120.688	928.3338	1384.627	1312.029	1154.854	868.69
	70	650	6	168	548.569068833577	1051.117	983.8878	809.0022	1117.999	944.9543	894.8438	817.1201	1132.496	1034.781
	50	550	9	168	549.537110730611	364.2788	536.9893	388.4656	477.2798	389.1917	585.0383	571.6422	527.566	376.4768
	60	550	9	168	550.934855285299	539.1955	429.71	485.7099	519.6316	534.249	375.5287	390.3638	500.1861	542.5681
	70	550	9	168	236.72052244512	714.1122	636.7173	582.9543	790.5144	810.4764	780.4267	829.1389	824.1712	708.6594
	50	600	9	168	267.51405533793	544.4227	389.7285	501.5355	290.068	398.924	467.5654	420.1771	435.7135	552.2252
	60	600	9	168	434.131532681889	719.3394	489.2789	598.7798	562.1512	666.6241	440.5075	390.3638	528.0546	718.3165
	70	600	9	168	655.338186910692	894.2561	919.718	696.0242	860.5559	853.4445	1000.172	1262.967	877.8433	884.4078
	50	650	9	168	783.685959328533	724.5666	809.8476	614.6054	655.3084	672.9482	774.9996	817.4334	866.0488	727.9735
	60	650	9	168	870.914080130827	899.4833	1366.927	711.8497	1262.32	1012.379	1320.003	1431.638	1148.064	894.0649
	70	650	9	168	939.071542813808	1074.4	1225.455	809.0941	1529.897	1198.388	1139.092	1136.039	1317.234	1060.156
	50	550	12	168	953.676814164782	387.5623	388.0588	388.5574	455.7858	369.2534	309.8909	219.1158	166.7143	401.8516
	60	550	12	168	980.576360491836	562.479	667.5543	485.8018	395.5947	488.0464	572.1016	621.3246	541.9128	567.9429
	70	550	12	168	0	737.3957	796.1012	583.0461	683.4503	728.2676	625.8569	691.0455	923.1458	734.0342
	50	600	12	168	442.702213806754	567.7062	321.2544	501.6273	271.6141	399.6209	111.2389	219.1158	312.1182	577.6
	60	600	12	168	494.047262658687	742.6229	808.2906	598.8717	558.0105	692.3095	579.1446	621.3246	807.038	743.6913
	70	600	12	168	548.133009383138	917.5397	1573.886	696.116	1011.147	1000.082	1399.389	1262.967	1214.075	909.7826
	50	650	12	168	556.715515483434	747.8501	315.7347	614.6972	667.4043	700.1567	366.1228	296.355	564.4511	753.3484
	60	650	12	168	560.616143871932	922.7669	1147.175	711.9416	1429.868	1104.254	1135.567	1114.333	1249.042	919.4397
	70	650	12	168	560.308151350247	1097.684	2015.96	809.1859	2003.702	1282.212	1815.113	1849.336	1475.462	1085.531
	50	550	15	168	560.670836374656	410.8458	356.7764	388.6493	345.7808	349.1403	422.8369	418.915	248.2798	427.2264
	60	550	15	168	560.218651084363	585.7625	267.5651	485.8936	174.8912	462.1157	148.7379	117.8748	335.3822	593.3177
	70	550	15	168	0	760.6793	697.367	583.138	474.4189	697.6887	716.4885	691.0455	926.5923	759.409
	50	600	15	168	431.773198646732	590.9897	232.3139	501.7192	216.6118	396.228	255.405	215.3406	278.6947	602.9748
	60	600	15	168	453.491647732877	765.9065	376.774	598.9635	531.338	689.484	581.6028	545.7128	485.5189	769.0661
	70	600	15	168	471.379139525985	940.8232	1040.335	696.2079	1145.826	1005.233	929.0338	1262.967	1102.533	935.1574
	50	650	15	168	484.258992975585	771.1337	787.5146	614.7891	668.1733	710.5366	615.9217	654.8823	1061.552	778.7232
	60	650	15	168	490.786190769222	946.0504	1490.307	712.0334	1610.41	1107.455	1459.603	1441.583	1458.048	944.8145
	70	650	15	168	494.562021560824	1120.967	2736.627	809.2778	2503.851	1275.862	2645.851	2455.223	1894.445	1110.906
	50	550	0	192	498.828433004833	356.7656	440.6553	435.9451	402.6416	453.0366	538.5311	505.5703	441.6875	363.6349
	60	550	0	192	503.533484423327	531.6823	616.7905	533.1895	562.8328	593.3631	525.4698	494.3938	492.9635	529.7262
	70	550	0	192	0	706.5991	705.4814	630.4338	738.7922	706.1351	648.5017	841.0271	563.6697	695.8176
	50	600	0	192	335.958358237849	536.9095	420.6227	549.015	366.1942	492.1311	524.9917	505.5703	402.8709	539.3833
	60	600	0	192	399.524115812779	711.8263	625.741	646.2594	616.4014	626.3107	732.6241	781.4897	573.8687	705.4746
	70	600	0	192	459.223677708076	886.743	701.1917	743.5037	590.0634	668.7443	675.0017	598.4885	670.3782	871.566
	50	650	0	192	521.508278494342	717.0535	686.139	662.0849	621.5113	706.4852	689.1297	650.1717	526.3629	715.1317
	60	650	0	192	570.87368457229	891.9702	859.4685	759.3293	965.5299	796.4197	840.6061	849.7931	887.0325	881.223
	70	650	0	192	606.456850610053	1066.887	462.7832	856.5736	633.9	777.4248	482.1596	529.6112	802.9253	1047.314
	50	550	3	192	637.129436519186	380.0491	252.2692	436.037	397.9933	447.0693	179.1861	169.6779	370.4814	389.0098
	60	550	3	192	662.258864254177	554.9659	631.3107	533.2813	569.6037	597.9686	639.8262	669.555	614.381	555.1011
	70	550	3	192	687.376100696024	729.8826	984.3345	630.5257	835.5815	729.8532	982.952	841.0271	618.0536	721.1924
	50	600	3	192	107.358958741417	560.1931	170.4719	549.1069	294.5785	464.5344	281.5698	295.2206	203.0588	564.7581
	60	600	3	192	114.734020518737	735.1098	472.2653	646.3512	565.5059	646.0216	529.0858	516.145	566.6799	730.8495
	70	600	3	192	142.338112881419	910.0265	539.8966	743.5956	669.4339	720.704	455.8881	598.4885	596.1557	896.9408
	50	650	3	192	166.537624872758	740.337	820.2076	662.1768	607.592	729.4026	743.4127	788.1066	633.3693	740.5065
	60	650	3	192	171.295635790246	915.2537	1103.435	759.4211	1024.523	879.1241	1125.193	1102.632	1186.662	906.5979
	70	650	3	192	172.454477499396	1090.17	634.5346	856.6655	878.6514	814.6754	568.1643	529.6112	1035.521	1072.689
	50	550	6	192	173.760105825039	403.3327	430.5388	436.1288	439.5412	410.4401	386.7233	360.196	477.3763	414.3846
	60	550	6	192	175.064768449258	578.2494	783.0461	533.3731	570.741	614.5558	686.7817	669.555	753.9673	580.4759
	70	550	6	192	176.941126316658	753.1661	1545.129	630.6175	893.7994	728.7703	1330.184	1514.259	955.4543	746.5672
	50	600	6	192	179.031387049538	583.4766	235.2212	549.1987	267.7199	444.4326	265.2353	271.1205	196.3524	590.133
	60	600	6	192	257.31482974391	758.3933	632.3825	646.4431	550.9514	669.9642	461.1205	516.145	592.665	756.2243
	70	600	6	192	602.329853025916	933.31	1056.566	743.6874	796.7332	826.1606	654.7357	731.4964	819.9554	922.3156
	50	650	6	192	621.191447279314	763.6205	565.8698	662.2686	610.7873	758.7513	612.3431	532.8183	605.1856	765.8814
	60	650	6	192	639.267219132106	938.5372	1359.77	759.513	1132.965	931.9256	1383.173	1312.029	1191.167	931.9727
	70	650	6	192	650.713397749312	1113.454	1180.832	856.7573	1230.062	1000.4	935.1981	817.1201	1237.842	1098.064
	50	550	9	192	656.686204985574	426.6162	604.6424	436.2206	474.0508	399.4221	596.7737	571.6422	539.6625	439.7594
	60	550	9	192	660.593037322193	601.5329	502.262	533.465	521.8551	567.3059	368.5293	390.3638	500.8241	605.8507
	70	550	9	192	664.713847288273	776.4496	566.0303	630.7093	874.8587	813.4063	834.6645	829.1389	893.8426	771.942
	50	600	9	192	670.692224441137	606.7601	345.8917	549.2905	254.6545	417.1331	505.2585	420.1771	419.255	615.5078
	60	600	9	192	0	781.6768	421.6058	646.5349	549.4622	687.7281	440.7403	390.3638	500.1386	781.5991
	70	600	9	192	85.7699886281756	956.5936	854.3484	743.7792	948.3491	916.4016	1109.172	1262.967	918.9596	947.6904
	50	650	9	192	213.855521154918	786.904	951.4008	662.3605	618.6371	738.6755	755.3195	817.4334	901.8926	791.2562
	60	650	9	192	298.850524349419	961.8207	1522.956	759.6048	1280.765	1026.333	1353.766	1431.638	1172.448	957.3475
	70	650	9	192	383.731059481684	1136.737	1279.869	856.8492	1669.055	1237.67	1179.468	1136.039	1410.653	1123.439
	50	550	12	192	498.522931002344	449.8997	316.1979	436.3125	453.2057	369.8733	294.5998	219.1158	176.8632	465.1342
	60	550	12	192	731.904913249158	624.8164	490.5289	533.5568	390.2907	498.433	564.2208	621.3246	540.6041	631.2255
	70	550	12	192	800.17397570199	799.7332	737.2469	630.8012	755.2321	781.4253	646.2251	691.0455	990.8693	797.3168
	50	600	12	192	949.399658863017	630.0436	198.0406	549.3824	227.7554	426.1717	135.5819	219.1158	293.7118	640.8826
	60	600	12	192	1079.58917640069	804.9603	606.782	646.6267	541.0455	702.8696	542.0625	621.3246	777.1746	806.9739
	70	600	12	192	1298.56749576698	979.8771	1788.995	743.8711	1101.323	980.795	1557.474	1262.967	1253.243	973.0652
	50	650	12	192	281.508867513163	810.1875	228.3523	662.4523	623.4275	740.406	354.561	296.355	598.3468	816.631
	60	650	12	192	291.08296095042	985.1043	1001.73	759.6966	1456.505	1088.262	1162.904	1114.333	1271.479	982.7223
	70	650	12	192	326.323282301764	1160.021	2112.38	856.941	97612	1303.339	1934.633	1849.336	1566.933	1148.814
	50	550	15	192	357.453423017907	473.1832	477.3054	436.4043	345.877	368.956	406.1286	418.915	246.5344	490.509
	60	550	15	192	365.676252266443	648.0999	194.2494	533.6487	164.1475	471.1311	176.0455	117.8748	322.1783	656.6003
	70	550	15	192	365.954807604201	823.0167	728.8312	630.893	532.7647	729.8437	741.9891	691.0455	982.4218	822.6916
	50	600	15	192	366.452717577246	653.3271	255.7616	549.4742	170.1016	439.8697	272.1666	215.3406	248.3942	666.2574
	60	600	15	192	366.522356411686	828.2439	233.247	646.7186	514.2257	704.9687	566.9837	545.7128	443.7597	832.3487
	70	600	15	192	366.592444528928	1003.161	1241.535	743.9629	1237.762	999.1006	1006.68	1262.967	1129.807	998.44
	50	650	15	192	366.592444528928	833.4711	899.803	662.5441	624.152	738.6287	588.4866	654.8823	1083.551	842.0058
	60	650	15	192	196.370897068572	1008.388	1455.853	759.7885	1648.9	1075.721	1466.733	1441.583	1468.589	1008.097
	70	650	15	192	610.864970358279	1183.305	2872.149	857.0328	2688.84	1282.096	2889.955	2455.223	1974.021	1174.188
	50	550	0	216	638.035598681127	419.103	428.9013	483.7002	384.6807	463.7069	493.3064	505.5703	469.0305	426.9176
	60	550	0	216	656.833558754008	594.0198	568.8677	580.9445	569.1684	630.7595	563.6766	494.3938	508.3007	593.0089
	70	550	0	216	670.640688531771	768.9365	799.5459	678.1889	820.2997	714.4894	691.4139	841.0271	675.7145	759.1002
	50	600	0	216	676.165074520859	599.2469	454.3235	596.7701	361.7779	506.2063	527.0164	505.5703	440.7721	602.666
	60	600	0	216	679.600404205869	774.1637	615.2191	694.0144	616.9721	668.835	737.1279	781.4897	599.7642	768.7573
	70	600	0	216	681.712108584305	949.0804	790.1986	791.2588	651.788	717.7967	703.2103	598.4885	792.981	934.8486
	50	650	0	216	684.032826224993	779.3909	826.1825	709.84	617.5875	722.3874	708.9869	650.1717	534.538	778.4143
	60	650	0	216	0	954.3076	865.9189	807.0843	961.3991	821.5041	836.5981	849.7931	883.2012	944.5057
	70	650	0	216	115.158182043868	1129.224	589.4582	904.3287	686.1204	780.2294	501.6956	529.6112	895.8013	1110.597
	50	550	3	216	237.654885210851	442.3865	274.4188	483.792	392.1962	449.7099	153.9785	169.6779	354.2427	452.2924
	60	550	3	216	387.172543124038	617.3033	613.4638	581.0364	585.0073	616.9875	662.2926	669.555	586.1362	618.3837
	70	550	3	216	543.571382557813	792.22	1023.133	678.2807	929.7476	727.9236	1135.394	841.0271	686.5161	784.475
	50	600	3	216	690.904469831394	622.5305	197.8785	596.8619	286.1061	468.3883	251.8391	295.2206	197.3779	628.0408
	60	600	3	216	894.581122907523	797.4472	497.3187	694.1063	569.468	659.2599	531.9193	516.145	548.9932	794.1321
	70	600	3	216	1183.84436460135	972.3639	579.1369	791.3506	748.5282	751.4145	462.8497	598.4885	675.1766	960.2234
	50	650	3	216	1416.57268929438	802.6744	921.2169	709.9318	591.5606	758.7297	764.2784	788.1066	597.9618	803.7892
	60	650	3	216	1611.16009733799	977.5911	1063.804	807.1762	1025.657	867.6993	1131.247	1102.632	1139.252	969.8805
	70	650	3	216	1845.45736019823	1152.508	629.7862	904.4205	958.2309	882.5851	608.934	529.6112	1084.817	1135.972
	50	550	6	216	333.503127518128	465.6701	420.8756	483.8839	438.5588	415.183	365.7381	360.196	502.4808	477.6672
	60	550	6	216	468.722184602746	640.5868	655.1401	581.1282	586.2917	621.3002	679.7936	669.555	767.0657	643.7585
	70	550	6	216	512.293638559831	815.5035	1635.851	678.3726	989.1959	776.1594	1523.091	1514.259	1065.262	809.8498
	50	600	6	216	565.995799189176	645.814	196.4681	596.9538	248.9254	447.6521	268.8614	271.1205	232.0145	653.4156
	60	600	6	216	580.37273102355	820.7307	513.0299	694.1981	551.0634	702.8779	483.6841	516.145	616.3212	819.5069
	70	600	6	216	581.984720577509	995.6474	1119.034	791.4425	883.8367	832.519	713.1303	731.4964	940.3191	985.5982
	50	650	6	216	582.719711052707	825.9579	637.7399	710.0237	579.0896	735.086	610.5261	532.8183	611.1213	829.164
	60	650	6	216	583.159409989078	1000.875	1268.508	807.268	1135.186	921.0988	1378.674	1312.029	1185.1	995.2553
	70	650	6	216	583.305856361502	1175.791	1327.694	904.5124	1330.853	1014.246	972.6889	817.1201	1328.481	1161.347
	50	550	9	216	583.305856361502	488.9536	487.7536	483.9757	473.3918	387.0601	594.2785	571.6422	496.2853	503.042
	60	550	9	216	303.087567010313	663.8703	386.3999	581.2201	531.7864	585.9019	366.039	390.3638	445.4403	669.1333
	70	550	9	216	323.111116118098	838.787	753.0854	678.4644	962.7205	804.9769	894.8012	829.1389	935.1667	835.2246
	50	600	9	216	335.767001588669	669.0975	378.5806	597.0456	223.1776	413.6644	549.9973	420.1771	386.4353	678.7904
	60	600	9	216	346.319650797463	844.0142	492.9646	694.29	541.8182	720.8793	465.3112	390.3638	455.3131	844.8817
	70	600	9	216	354.935496365111	1018.931	1191.818	791.5343	1036.134	902.3209	1230.814	1262.967	970.842	1010.973
	50	650	9	216	362.839982668348	849.2414	900.3667	710.1155	571.5904	713.4668	746.3489	817.4334	839.347	854.5388
	60	650	9	216	368.569955967346	1024.158	1501.145	807.3599	1282.414	1005.556	1388.399	1431.638	1097.899	1020.63
	70	650	9	216	371.936101821922	1199.075	1506.572	904.6042	1785.548	1237.021	1211.857	1136.039	1432.809	1186.721
	50	550	12	216	375.789549518676	512.2371	191.4573	484.0676	451.9157	389.8498	265.5683	219.1158	143.9073	528.4168
	60	550	12	216	0	687.1538	303.1792	581.3119	392.8314	512.2967	564.164	621.3246	495.6418	694.5081
	70	550	12	216	295.696833404385	862.0706	825.2173	678.5563	830.6007	782.2987	658.35	691.0455	1042.617	860.5994
	50	600	12	216	510.77931986422	692.381	373.5995	597.1375	185.5018	418.2119	173.383	219.1158	271.3141	704.1652
	60	600	12	216	583.937963323128	867.2978	757.375	694.3818	525.6343	737.1793	518.5253	621.3246	742.7716	870.2565
	70	600	12	216	640.652726997989	1042.214	2178.102	791.6262	1185.409	1012.703	1721.279	1262.967	1315.547	1036.348
	50	650	12	216	707.824800773285	872.5249	83.87147	710.2074	565.1735	768.8317	365.0834	296.355	546.2227	879.9136
	60	650	12	216	729.070196949535	1047.442	905.354	807.4517	1458.622	1100.969	1206.893	1114.333	1207.351	1046.005
	70	650	12	216	774.951557291691	1222.358	2236.92	904.6961	2294.952	1268.944	2036.372	1849.336	1599.511	1212.096
	50	550	15	216	817.482722175598	535.5206	268.9572	484.1594	346.2874	379.032	371.16	418.915	216.046	553.7916
	60	550	15	216	848.505177573116	710.4374	65.79538	581.4037	161.3745	495.7537	223.2585	117.8748	279.684	719.8829
	70	550	15	216	875.615959983742	885.3541	686.3652	678.6481	594.7135	755.2018	758.1868	691.0455	1036.635	885.9742
	50	600	15	216	158.432032535531	715.6645	225.3579	597.2293	122.6162	468.4126	293.2767	215.3406	228.4637	729.54
	60	600	15	216	170.674808601313	890.5813	320.3805	694.4737	494.55	768.8707	566.9666	545.7128	411.824	895.6313
	70	600	15	216	192.995586938977	1065.498	1377.851	791.718	1316.856	1013.091	1104.702	1262.967	1194.577	1061.723
	50	650	15	216	208.615675920479	895.8085	819.7488	710.2992	561.7629	718.9109	581.6907	654.8823	1033.897	905.2884
	60	650	15	216	211.252641718265	1070.725	1566.406	807.5436	1654.709	1082.685	1475.285	1441.583	1406.93	1071.38
	70	650	15	216	213.180180761987	1245.642	3014.287	904.7879	2825.216	1273.82	3104.681	2455.223	2009.065	1237.471
	50	550	0	240	214.183083032055	481.4404	438.8364	531.4552	374.8223	469.9484	439.3964	505.5703	432.1178	490.2002
	60	550	0	240	214.254087333837	656.3572	672.9029	628.6996	583.7881	626.1563	619.5581	494.3938	509.3773	656.2915
	70	550	0	240	214.254087333837	831.2739	982.2568	725.9439	904.047	720.3859	741.8755	841.0271	769.4613	822.3828
	50	600	0	240	214.254087333837	661.5844	382.0242	644.5251	368.6847	532.8335	517.2934	505.5703	369.7453	665.9486
	60	600	0	240	240.667470951484	836.5011	592.8604	741.7695	630.5132	668.7678	755.6203	781.4897	566.7258	832.0399
	70	600	0	240	536.135277346842	1011.418	935.9398	839.0138	724.7923	743.6615	726.8684	598.4885	852.6138	998.1312
	50	650	0	240	584.749377095946	841.7283	767.2579	757.5951	618.0909	729.9284	740.8618	650.1717	565.6013	841.697
	60	650	0	240	606.855809252246	1016.645	798.4824	854.8394	962.3113	817.0945	859.5689	849.7931	952.2539	1007.788
	70	650	0	240	617.482740538189	1191.562	673.1251	952.0838	746.078	798.5747	552.001	529.6112	1057.525	1173.88
	50	550	3	240	623.002817273333	504.7239	290.7109	531.5471	394.412	449.4343	121.4039	169.6779	345.6309	515.575
	60	550	3	240	627.090197328589	679.6407	684.4289	628.7914	609.7056	631.7342	697.0036	669.555	615.5139	681.6663
	70	550	3	240	629.885112642528	854.5574	1240.817	726.0358	1026.492	727.4033	1295.86	841.0271	808.5646	847.7576
	50	600	3	240	633.804093060384	684.8679	168.5774	644.617	289.6056	511.7504	214.6944	295.2206	154.6521	691.3234
	60	600	3	240	0	859.7846	478.5311	741.8613	586.7029	693.7666	550.8679	516.145	544.2566	857.4147
	70	600	3	240	73.0599989575075	1034.701	796.4922	839.1057	837.0028	791.3337	476.9606	598.4885	763.1106	1023.506
	50	650	3	240	124.426960884202	865.0118	928.3262	757.6869	579.0002	744.0649	793.3147	788.1066	657.3273	867.0718
	60	650	3	240	195.953397140159	1039.929	1022.974	854.9312	1028.579	834.8263	1155.363	1102.632	1236.604	1033.163
	70	650	3	240	366.308942182338	1214.845	826.8809	952.1756	1038.551	865.8899	670.2525	529.6112	1274.842	1199.254
	50	550	6	240	566.511733642531	528.0075	615.3852	531.6389	444.8333	419.5912	333.9149	360.196	628.6528	540.9498
	60	550	6	240	590.837017272419	702.9242	903.4074	628.8833	611.8215	628.8474	674.2119	669.555	931.2253	707.0411
	70	550	6	240	612.32813620643	877.8409	2021.777	726.1276	1087.489	769.9218	1720.389	1514.259	1322.092	873.1324
	50	600	6	240	633.736617313386	708.1514	288.3653	644.7088	241.7977	461.1677	272.533	271.1205	324.0721	716.6982
	60	600	6	240	652.439377756438	883.0681	583.5654	741.9532	563.5477	704.0553	537.097	516.145	746.3677	882.7895
	70	600	6	240	666.960079153517	1057.985	1416.653	839.1975	976.9544	854.841	791.1482	731.4964	1163.036	1048.881
	50	650	6	240	138.028564964876	888.2953	787.759	757.7787	549.0556	734.7579	620.8548	532.8183	805.2695	892.4466
	60	650	6	240	262.534480536139	1063.212	1338.713	855.0231	1134.363	891.5115	1385.403	1312.029	1417.235	1058.538
	70	650	6	240	356.585172755888	1238.129	1554.078	952.2674	1423.019	999.5825	1021.554	817.1201	1653.288	1224.629
	50	550	9	240	416.152495048015	551.291	528.9	531.7308	478.8949	400.0694	577.3374	571.6422	509.1121	566.3246
	60	550	9	240	424.91288908589	726.2077	592.8267	628.9751	552.203	589.6712	369.0948	390.3638	496.2576	732.4159
	70	550	9	240	428.201013106358	901.1244	855.4035	726.2195	1053.863	785.4514	963.1117	829.1389	1078.652	898.5072
	50	600	9	240	430.730379005717	731.4349	400.6983	644.8007	202.2304	444.32	597.8196	420.1771	365.1473	742.073
	60	600	9	240	431.096994381593	906.3516	425.4238	742.045	544.5091	749.0736	519.3687	390.3638	472.0144	908.1643
	70	600	9	240	431.604791475493	1081.268	1144.597	839.2894	1125.259	955.1131	1370.008	1262.967	1080.214	1074.256
	50	650	9	240	432.036083934375	911.5788	1009.948	757.8706	523.5992	765.6573	754.1038	817.4334	920.1501	917.8214
	60	650	9	240	374.694639839416	1086.496	1462.615	855.1149	1274.768	994.357	1440.967	1431.638	1216.689	1083.913
	70	650	9	240	575.418732470466	1261.412	1417.457	952.3593	1882.098	1163.419	1254.463	1136.039	1644.271	1250.004
	50	550	12	240	610.221765706509	574.5745	182.6765	531.8226	455.6638	390.7302	224.2153	219.1158	-41.0008	591.6994
	60	550	12	240	629.116489113763	749.4912	432.6373	629.067	406.2812	555.3743	572.9217	621.3246	348.7231	757.7907
	70	550	12	240	636.069541049217	924.408	936.0759	726.3113	909.717	789.0316	666.907	691.0455	988.3665	923.8821
	50	600	12	240	639.798459130064	754.7184	329.4464	644.8925	151.968	465.056	219.0397	219.1158	52.29206	767.4478
	60	600	12	240	642.304889178666	929.6352	596.5219	742.1369	517.5297	759.4541	513.5168	621.3246	561.7382	933.5391
	70	600	12	240	643.736146836365	1104.552	2139.55	839.3812	1265.14	1031.779	1895.399	1262.967	1227.185	1099.63
	50	650	12	240	644.951495461753	934.8624	61.59289	757.9624	502.6645	742.428	403.8113	296.355	429.291	943.1962
	60	650	12	240	0	1109.779	694.3398	855.2068	1444.088	1073.149	1285.881	1114.333	1128.407	1109.288
	70	650	12	240	109.170640321032	1284.696	2115.096	952.4511	2390.318	1230.881	2139.794	1849.336	1613.237	1275.379
	50	550	15	240	186.026931453009	597.858	387.8541	531.9145	350.8053	395.2694	320.8098	418.915	207.1208	617.0742
	60	550	15	240	401.169852098787	772.7748	298.9029	629.1588	169.866	518.3647	290.4348	117.8748	308.7484	783.1656
	70	550	15	240	491.888722778448	947.6915	811.5493	726.4032	660.8927	750.6284	768.6574	691.0455	1158.369	949.2569
	50	600	15	240	676.851864289784	778.0019	466.3321	644.9844	81.53539	501.9911	314.3946	215.3406	185.4245	792.8226
	60	600	15	240	695.04492626598	952.9187	420.6264	742.2287	478.3714	759.5869	586.3831	545.7128	406.7737	958.914
	70	600	15	240	724.98689692077	1127.835	1569.572	839.4731	1385.256	1025.626	1231.947	1262.967	1282.198	1125.005
	50	650	15	240	757.533490983776	958.1459	957.7064	758.0543	491.2531	716.8798	601.4037	654.8823	1092.948	968.571
	60	650	15	240	783.283070756728	1133.063	1420.184	855.2986	1635.852	1077.981	1506.111	1441.583	1503.969	1134.662
	70	650	15	240	796.455477884159	1307.979	2957.27	952.543	371119	1242.825	3309.141	2455.223	2198.778	1300.754

## Sheet: sheet 5
	Table S3. Experimental and predicted CO2 emission, mg CO2·g-1d.m, in different machine learning models
	Temperature	Biochar type	Biochar_dose	Time	Experimental data	Linear Regression	Random Forest	Generalized Boosted Regression Models	SVM with Linear Kernel	SVM with Radial Basis Function Kernel	k-Nearest Neighbors	Bayesian Regularized Neural Network	Recursive Partitioning and Regression Trees	Extreme Gradient Boosting Tree	Partial Least Squares Regression
	50	550	0	24	83.8927715980534	229.214	99.77528	51.61693	211.6592	98.35563	172.8057	83.0832	83.36951	35.62538	237.4437
	60	550	0	24	93.5588360200376	117.6739	105.3559	91.71742	117.6806	101.256	173.7338	93.89868	83.36951	62.63892	122.8236
	70	550	0	24	47.8358666500533	6.133862	81.05002	65.57416	23.70187	72.78448	90.86023	66.88269	51.69251	71.83878	8.203554
	50	600	0	24	82.2848638958382	215.6175	51.22464	23.75875	195.7034	36.98683	150.9931	35.23429	53.96672	7.870762	218.7946
	60	600	0	24	162.987235807161	104.0775	96.78787	75.1472	101.7247	107.6806	137.7033	131.9227	78.59424	94.50345	104.1745
	70	600	0	24	231.031059871467	-7.46258	38.12969	38.71967	7.74606	27.60227	76.91658	-3.93551	51.69251	41.13144	-10.4455
	50	650	0	24	306.996782456276	202.0211	90.03103	107.7528	179.7476	94.12779	173.5139	109.9673	53.96672	97.01194	200.1455
	60	650	0	24	370.271893721704	90.48103	97.58801	104.3571	85.76894	104.3641	170.5496	74.28142	78.59424	66.93516	85.52544
	70	650	0	24	417.712507741141	-21.059	61.61428	85.69854	-8.20975	48.86716	82.40499	31.41566	51.69251	87.03967	-29.0946
	50	550	3	24	473.118049183388	218.75	92.13256	50.45863	199.43	88.33171	154.6522	77.47396	83.36951	22.34237	226.284
	60	550	3	24	522.193483884663	107.2099	99.15834	91.20581	105.4513	100.8005	143.2077	81.89047	83.36951	73.90917	111.664
	70	550	3	24	564.949777274909	-4.33014	37.43484	3.634428	11.47264	27.51227	76.27492	-8.76768	31.40198	22.42507	-2.95611
	50	600	3	24	0	205.1535	48.75144	32.32468	183.4742	32.15928	116.6166	44.33902	53.96672	-6.16543	207.6349
	60	600	3	24	88.0904940512097	93.61347	90.35457	84.35982	89.49552	100.3935	127.88	94.6972	78.59424	105.0203	93.01487
	70	600	3	24	169.813522456679	-17.9266	16.34489	-13.4958	-4.48317	22.82375	49.58686	-20.1051	12.88313	-9.03549	-21.6052
	50	650	3	24	240.326655575742	191.5571	82.18091	106.9483	167.5184	74.67284	148.1285	86.58442	53.96672	110.3414	188.9859
	60	650	3	24	309.230415138931	80.01703	80.92674	104.1994	73.53971	86.22299	128.4647	83.57316	78.59424	104.8177	74.36578
	70	650	3	24	370.131882606519	-31.523	45.55184	24.11267	-20.439	41.45353	74.89957	55.95946	109.6281	64.23834	-40.2543
	50	550	6	24	415.076506618775	208.286	94.23926	63.68025	187.2008	96.19059	147.0392	79.38	83.36951	44.38609	215.1244
	60	550	6	24	451.972680325613	96.74591	99.9643	95.29959	93.2221	102.5652	145.3659	119.1226	83.36951	100.8341	100.5043
	70	550	6	24	484.026424391783	-14.7941	26.40718	-5.65278	-0.75658	27.20566	73.64528	-5.84616	31.40198	-23.548	-14.1158
	50	600	6	24	506.444632438544	194.6895	52.56978	42.06104	171.245	43.567	111.586	45.62861	53.96672	23.76111	196.4753
	60	600	6	24	522.482648392572	83.14947	89.34726	84.96835	77.26629	96.77067	117.8701	31.9491	78.59424	139.8283	81.85521
	70	600	6	24	43.377128798219	-28.3906	12.82653	-26.2683	-16.7124	27.90247	32.73941	25.08824	16.67077	-47.1257	-32.7649
	50	650	6	24	78.6396331101894	181.0931	78.08048	102.9401	155.2892	78.76099	125.5921	63.48838	53.96672	109.8066	177.8262
	60	650	6	24	104.173085027652	69.55303	73.75526	91.06333	61.31048	69.53567	112.2501	76.90483	78.59424	109.1642	63.20612
	70	650	6	24	126.647620908414	-41.987	17.80409	-2.40436	-32.6682	31.48593	46.48245	2.586547	16.67077	-4.31321	-51.414
	50	550	9	24	147.550213825871	197.822	96.22839	91.24557	174.9716	97.77465	145.8864	101.3871	83.36951	98.42384	203.9647
	60	550	9	24	162.037580055247	86.28191	100.5051	118.1829	80.99288	98.03269	148.6373	89.55687	83.36951	96.08234	89.34463
	70	550	9	24	190.757402844274	-25.2581	48.24424	51.17813	-12.9858	38.21085	67.5675	38.33804	31.40198	88.61427	-25.2754
	50	600	9	24	209.960597963564	184.2255	48.05446	27.99786	159.0158	35.5196	113.9335	50.49057	63.46381	20.97896	185.3156
	60	600	9	24	222.748566394772	72.68547	77.84993	66.22318	65.03707	84.13202	111.3015	81.14686	63.46381	78.25654	70.69554
	70	600	9	24	0	-38.8546	11.89556	-11.0659	-28.9416	22.83074	29.43397	14.89469	16.67077	8.216591	-43.9245
	50	650	9	24	74.989064316576	170.6291	72.35002	29.28887	143.0599	93.42879	121.7001	41.09729	37.85626	43.19165	166.6665
	60	650	9	24	157.806193591354	59.08903	30.96298	12.73007	49.08126	22.6138	91.39842	5.292617	37.85626	-16.2403	52.04645
	70	650	9	24	224.587394649869	-52.451	18.44685	-46.79	-44.8974	32.79492	31.19891	36.17449	16.67077	-12.8037	-62.5736
	50	550	12	24	302.593745459768	187.358	93.40008	109.1672	162.7423	86.2345	159.1591	32.36079	83.36951	80.3292	192.805
	60	550	12	24	374.185724983162	75.81791	102.3348	118.5099	68.76365	107.7827	142.6552	81.91486	83.36951	86.94035	78.18497
	70	550	12	24	418.579926255553	-35.7221	41.44099	54.60026	-25.215	27.65331	77.73064	31.11561	31.40198	35.30663	-36.4351
	50	600	12	24	479.105005319171	173.7615	67.67863	58.96662	146.7865	74.72206	119.3396	99.16455	63.46381	64.86314	174.156
	60	600	12	24	526.896291384744	62.22147	84.11349	79.5973	52.80784	95.77954	110.5718	91.08355	63.46381	131.0932	59.53588
	70	600	12	24	568.336505880454	-49.3186	11.26208	5.403396	-41.1708	20.16167	37.80133	-0.68581	16.67077	16.88773	-55.0842
	50	650	12	24	0	160.1651	83.3036	52.63139	130.8307	94.24261	123.8698	42.90539	37.85626	60.9374	155.5069
	60	650	12	24	68.7285737282179	48.62503	42.00844	18.47795	36.85203	43.54803	84.7232	17.80375	37.85626	10.45816	40.88679
	70	650	12	24	153.343528217949	-62.915	13.59712	-37.947	-57.1267	22.9337	27.01989	30.07373	16.67077	-30.2708	-73.7333
	50	550	15	24	228.366901029019	176.894	85.43142	168.2837	150.5131	67.97017	183.4941	61.9661	83.36951	151.2826	181.6454
	60	550	15	24	290.623602624443	65.35391	105.5835	75.63305	56.53442	109.4913	164.4989	80.10403	83.36951	59.40754	67.02531
	70	550	15	24	364.057303958971	-46.1861	37.2215	42.26466	-37.4443	27.63323	85.18641	0.431234	31.40198	62.22926	-47.5948
	50	600	15	24	427.91226944495	163.2975	65.17017	85.18353	134.5573	77.84797	152.3151	45.11754	63.46381	73.9317	162.9963
	60	600	15	24	470.998567931352	51.75747	81.47567	3.820863	40.57861	85.23329	115.7767	70.43882	63.46381	41.6753	48.37622
	70	600	15	24	502.918543009806	-59.7826	11.17844	-39.8318	-53.4001	22.81166	48.04841	-12.4093	16.67077	-18.0747	-66.2439
	50	650	15	24	525.264035655813	149.7011	94.88698	80.88355	118.6015	101.1456	128.1603	116.7608	37.85626	93.94863	144.3472
	60	650	15	24	542.81265271301	38.16103	45.50345	-55.2632	24.6228	48.56559	94.96188	-2.77468	37.85626	-55.0171	29.72713
	70	650	15	24	38.0340221916284	-73.379	14.22231	-81.1469	-69.3559	27.67818	33.34226	8.764372	16.67077	-41.2906	-84.8929
	50	550	0	48	73.8046797667762	264.781	155.7706	128.1084	251.8099	145.5979	188.4647	155.0275	141.8526	126.656	272.9794
	60	550	0	48	90.6770341805406	153.241	173.7199	164.3592	157.8312	162.2203	176.6634	162.285	173.4548	154.5383	158.3593
	70	550	0	48	107.23283410249	41.70094	105.4283	108.9691	63.85249	130.39	107.4595	123.0191	51.69251	110.3934	43.73922
	50	600	0	48	116.681985683181	251.1846	121.0308	95.48405	235.8541	105.712	162.3479	95.11727	127.7118	88.43256	254.3303
	60	600	0	48	119.10362754557	139.6446	163.7309	143.0228	141.8754	159.9043	161.2555	200.8961	156.5239	175.9339	139.7102
	70	600	0	48	133.554340096946	28.1045	50.26558	77.34841	47.89668	27.49169	76.91658	26.26826	51.69251	69.21724	25.09013
	50	650	0	48	150.189278641849	237.5882	153.6775	179.9242	219.8982	151.8048	190.4419	172.1861	127.7118	176.8384	235.6812
	60	650	0	48	157.37506560606	126.0481	164.44	172.6788	125.9196	157.1311	173.5485	149.0986	156.5239	147.6303	121.0611
	70	650	0	48	0	14.50806	80.72278	124.7734	31.94087	69.88869	96.53047	67.23001	51.69251	114.3901	6.441035
	50	550	3	48	62.0809898249591	254.317	143.7701	122.6242	239.5806	131.016	177.943	148.6137	141.8526	104.2103	261.8197
	60	550	3	48	139.964413423544	142.777	172.6615	159.5217	145.602	166.0918	177.0907	155.0841	173.4548	156.6457	147.1996
	70	550	3	48	224.20889681218	31.23694	56.40967	42.70347	51.62327	43.71045	80.66502	35.33117	31.40198	51.81697	32.57955
	50	600	3	48	297.303064781108	240.7206	108.7652	99.72411	223.6248	106.2606	148.8578	99.38654	127.7118	65.23363	243.1706
	60	600	3	48	356.061112924697	129.1806	157.5705	147.9095	129.6461	155.093	171.1044	167.5668	156.5239	177.2881	128.5505
	70	600	3	48	406.886297117841	17.6405	23.87888	20.80704	35.66746	17.12665	55.18182	-3.95429	12.88313	9.887533	13.93046
	50	650	3	48	460.886736695405	227.1242	146.6105	174.7939	207.669	149.231	169.4204	148.108	127.7118	181.0048	224.5215
	60	650	3	48	500.593252532473	115.5841	152.7486	168.1952	113.6903	150.2503	165.9552	158.101	156.5239	176.3499	109.9014
	70	650	3	48	532.356355397886	4.044062	61.88973	58.86167	19.71165	56.81575	63.26538	72.912	109.6281	82.42588	-4.71863
	50	550	6	48	0	243.853	151.3675	133.9638	227.3514	147.7468	182.6939	151.1673	141.8526	118.3359	250.66
	60	550	6	48	57.172591794745	132.313	173.4902	161.7334	133.3727	163.5836	182.8856	195.0067	173.4548	175.6526	136.04
	70	550	6	48	138.213918778112	20.77294	37.04345	31.5342	39.39404	24.47006	82.40405	23.97176	31.40198	-2.07418	21.41989
	50	600	6	48	217.67761689248	230.2566	129.6789	107.5784	211.3956	108.354	144.5728	95.67465	127.7118	87.24226	232.0109
	60	600	6	48	298.737409398446	118.7166	151.8941	146.636	117.4169	148.1316	167.2512	109.8757	156.5239	204.178	117.3909
	70	600	6	48	387.767850398586	7.176502	15.86733	6.152514	23.43823	20.81642	34.95024	31.07465	16.67077	-36.1207	2.770797
	50	650	6	48	464.003610089598	216.6602	140.9613	168.9037	195.4398	144.3671	160.5279	123.9107	127.7118	172.552	213.3619
	60	650	6	48	522.810408726179	105.1201	140.3992	153.1771	101.4611	130.207	145.9552	146.5122	156.5239	172.7784	98.74178
	70	650	6	48	565.638979329213	-6.41994	20.5314	30.46258	7.482419	27.3746	50.01717	6.181494	16.67077	5.95631	-15.8783
	50	550	9	48	594.130989394279	233.389	158.1754	160.2551	215.1222	156.0555	179.328	173.41	141.8526	169.4055	239.5004
	60	550	9	48	617.853181807148	121.849	165.5667	183.3427	121.1435	143.2973	191.1105	169.9052	173.4548	167.9327	124.8803
	70	550	9	48	14.3575010629606	10.30894	70.59627	87.09107	27.16481	67.59833	70.18096	64.39549	31.40198	107.12	10.26022
	50	600	9	48	19.1468982902177	219.7926	119.899	92.24119	199.1664	97.10873	147.704	97.38241	133.6797	81.49197	220.8513
	60	600	9	48	20.750491111844	108.2525	131.5893	126.6168	105.1877	133.4886	156.4108	158.4614	133.6797	139.6381	106.2312
	70	600	9	48	23.9362955174748	-3.2875	15.29261	20.08089	11.209	17.69781	36.06697	18.68512	16.67077	16.25351	-8.38887
	50	650	9	48	28.725692744732	206.1962	105.7324	93.97834	183.2106	146.786	148.397	99.94629	84.8313	102.9692	202.2022
	60	650	9	48	33.5150899719891	94.65611	65.74139	73.56981	89.23188	59.80781	125.1957	63.32106	84.8313	44.40602	87.58211
	70	650	9	48	36.7115849964308	-16.8839	20.9253	-15.1971	-4.74681	20.20774	31.48836	32.41569	16.67077	-5.50217	-27.038
	50	550	12	48	38.3044871992462	222.925	157.2045	178.5415	202.893	139.5361	184.1849	108.0361	141.8526	154.5448	228.3407
	60	550	12	48	39.8973894020616	111.385	170.9107	184.0345	108.9143	162.3985	177.33	169.3513	173.4548	162.0248	113.7206
	70	550	12	48	0	-0.15506	64.60459	90.87796	14.93559	50.34035	66.98631	55.55462	31.40198	57.04637	-0.89944
	50	600	12	48	59.1192636215555	209.3286	139.0248	123.5747	186.9372	137.5815	152.4081	146.262	133.6797	128.6097	209.6916
	60	600	12	48	113.459679037065	97.78855	144.4438	140.3557	92.95846	149.9389	150.4527	164.7391	133.6797	195.7088	95.07154
	70	600	12	48	172.57894265862	-13.7515	14.67749	36.91492	-1.02022	14.63547	42.23507	6.910162	16.67077	28.15862	-19.5485
	50	650	12	48	222.119411825661	195.7322	133.2614	117.6856	170.9813	146.549	147.7475	102.4024	84.8313	123.949	191.0425
	60	650	12	48	269.982020229801	84.19211	95.03337	79.68246	77.00265	68.18041	97.56386	61.57827	84.8313	74.33845	76.42245
	70	650	12	48	319.331757429448	-27.3479	16.67673	-5.98935	-16.976	13.79107	26.99254	23.27422	16.67077	-19.7353	-38.1976
	50	550	15	48	378.143541862292	212.461	156.7273	242.0189	190.6637	113.3842	206.3952	150.8832	141.8526	218.6446	217.181
	60	550	15	48	427.471897824319	100.921	175.901	145.5185	96.68505	161.1884	166.5242	166.6577	173.4548	127.6381	102.561
	70	550	15	48	473.624998401924	-10.6191	53.5618	82.90329	2.70636	20.127	96.91376	23.93722	31.40198	77.11509	-12.0591
	50	600	15	48	0	198.8646	126.9037	154.1525	174.7079	114.0056	160.0245	98.14972	133.6797	130.8247	198.5319
	60	600	15	48	6.24111040463659	87.32455	130.1489	68.94015	80.72924	132.8401	138.0648	136.1369	133.6797	99.4371	83.91188
	70	600	15	48	34.3779525671766	-24.2155	13.7429	-3.95934	-13.2495	16.06534	48.6022	1.009415	16.67077	-13.6577	-30.7082
	50	650	15	48	87.4975462605181	185.2682	143.6053	150.2987	158.7521	158.6842	158.8122	185.0961	84.8313	150.1062	179.8829
	60	650	15	48	142.201591747111	73.72811	62.05519	10.30219	64.77343	27.69513	94.96188	25.0877	84.8313	2.009223	65.26279
	70	650	15	48	196.920450188468	-37.8119	16.86084	-44.8284	-29.2053	22.08504	35.67563	3.649134	16.67077	-37.609	-49.3573
	50	550	0	72	243.906946242816	300.3481	227.335	196.8268	291.9605	228.9091	217.8431	227.2376	231.5146	210.8008	308.515
	60	550	0	72	293.939520163259	188.8081	235.0636	232.3256	197.9818	236.231	228.863	226.7686	231.5146	236.1075	193.8949
	70	550	0	72	329.957679385254	77.26802	149.4627	129.9371	104.0031	206.968	117.3237	167.1963	114.5369	138.88	79.27488
	50	600	0	72	356.647708429714	286.7517	183.108	160.6286	276.0047	191.3782	200.9599	161.6745	194.6078	159.4725	289.8659
	60	600	0	72	376.999930301168	175.2116	235.465	207.4153	182.026	232.9831	209.818	268.4946	233.0948	244.3982	175.2459
	70	600	0	72	19.026863046835	63.67158	65.16502	94.74249	88.04731	37.17729	87.36502	51.83449	114.5369	84.59908	60.62579
	50	650	0	72	26.1499851422581	273.1552	216.9882	245.3389	260.0489	236.6121	222.3696	241.4183	194.6078	247.8452	271.2168
	60	650	0	72	28.5881007588123	161.6152	222.5594	237.3415	166.0702	235.4769	226.4498	225.8452	233.0948	216.0614	156.5968
	70	650	0	72	33.368719614801	50.07514	109.719	142.4377	72.0915	102.9769	108.5941	102.1552	114.5369	129.7386	41.9767
	50	550	3	72	38.1493384707897	289.8841	218.4293	188.4067	279.7313	206.1755	229.9414	219.9366	231.5146	184.5123	297.3554
	60	550	3	72	42.9299573267784	178.3441	234.9637	224.5521	185.7526	245.4783	234.63	224.661	231.5146	234.3722	182.7353
	70	550	3	72	45.3680729433327	66.80402	81.29952	60.7355	91.77389	75.00931	108.9826	70.42281	53.31216	76.46078	68.11521
	50	600	3	72	45.3680729433327	276.2877	168.6214	161.9326	263.7755	192.5774	193.6193	160.585	194.6078	132.4308	278.7063
	60	600	3	72	45.3680729433327	164.7476	231.862	209.366	169.7968	230.2147	217.5217	238.0865	233.0948	241.9097	164.0862
	70	600	3	72	0	53.20758	24.57617	35.26514	75.81808	21.99904	75.76689	8.517821	12.88313	21.42653	49.46612
	50	650	3	72	57.3121907431904	262.6912	220.8197	237.2726	247.8196	244.5042	226.3518	216.5023	194.6078	248.1689	260.0572
	60	650	3	72	108.336609633162	151.1512	221.4146	229.9219	153.841	230.8527	225.8575	235.3291	233.0948	240.9383	145.4371
	70	650	3	72	171.979057174525	39.61114	79.46063	73.58993	59.86227	83.60119	81.01785	89.75456	109.6281	93.93169	30.81703
	50	550	6	72	229.33373286267	279.4201	225.7676	199.7463	267.502	230.6353	237.2573	223.9521	231.5146	197.8332	286.1957
	60	550	6	72	284.989010752647	167.8801	236.2205	226.7639	173.5234	246.9794	227.5138	266.1327	231.5146	252.5744	171.5756
	70	550	6	72	342.301201495838	56.34002	47.44386	49.56623	79.54466	36.40515	92.06682	46.95387	53.31216	21.76504	56.95555
	50	600	6	72	382.024625027997	265.8237	175.7337	169.7869	251.5462	177.9422	189.8793	151.5008	194.6078	153.6347	267.5466
	60	600	6	72	431.307161174848	154.2836	224.7607	208.0925	157.5675	218.1088	231.2595	184.3684	233.0948	267.9945	152.9265
	70	600	6	72	471.030584707007	42.74358	19.11447	20.61062	63.58885	27.19919	45.92748	34.34265	16.67077	-25.3864	38.30646
	50	650	6	72	0	252.2272	213.0751	231.3823	235.5904	230.3223	218.0388	191.1043	194.6078	238.9113	248.8975
	60	650	6	72	30.3817009623372	140.6872	212.8219	214.9038	141.6117	216.9329	191.9987	219.5315	233.0948	236.5621	134.2774
	70	650	6	72	91.0605297661759	29.14714	25.93534	45.19084	47.63304	34.52162	69.24197	11.30163	16.67077	16.65743	19.65737
	50	550	9	72	142.162753760317	268.9561	233.872	223.7782	255.2728	244.0431	234.1863	247.724	231.5146	240.8525	275.036
	60	550	9	72	185.268480752372	157.4161	221.3956	246.1139	161.2941	212.3845	239.7994	243.0067	231.5146	236.804	160.416
	70	550	9	72	223.58910393838	45.87602	97.26863	102.8638	67.31544	117.6035	89.39693	85.23404	86.41918	122.9087	45.79589
	50	600	9	72	253.911820570288	255.3597	172.0961	152.1904	239.317	165.4375	190.3155	149.8455	193.863	139.834	256.3869
	60	600	9	72	274.664329590101	143.8196	197.6585	185.814	145.3383	200.445	214.7547	231.3375	193.863	195.4045	141.7669
	70	600	9	72	293.817539209496	32.27958	18.0835	32.27969	51.35963	27.425	46.35428	21.0163	16.67077	18.9373	27.1468
	50	650	9	72	308.185645022843	241.7632	152.3506	154.1977	223.3612	228.2356	198.1494	165.5626	139.1957	161.278	237.7378
	60	650	9	72	322.547353638589	130.2232	104.5437	133.0372	129.3825	140.1371	161.9323	123.9203	139.1957	100.1391	123.1178
	70	650	9	72	9.51606120380386	18.68314	27.328	-2.72818	35.40382	21.37887	44.31042	32.34324	16.67077	-2.8516	8.497705
	50	550	12	72	12.680906369924	258.4921	231.564	240.6092	243.0436	221.8265	245.5179	186.8688	231.5146	229.7704	263.8764
	60	550	12	72	15.8457515360441	146.9521	233.6215	245.3502	149.0649	239.1588	233.4715	247.9133	231.5146	234.6747	149.2563
	70	550	12	72	19.0105967021643	35.41202	84.8097	105.1953	55.08621	96.66388	87.87592	76.06168	86.41918	76.61376	34.63622
	50	600	12	72	22.1754418682844	244.8957	204.1442	182.0685	227.0878	209.5012	194.5757	198.4892	193.863	190.7305	245.2273
	60	600	12	72	23.7898697765433	133.3556	216.5054	198.0975	133.1091	218.5416	202.2112	233.7117	193.863	255.2538	130.6072
	70	600	12	72	23.7898697765433	21.81558	17.84236	47.6583	39.1304	23.40801	56.08839	14.26102	16.67077	34.62109	15.98713
	50	650	12	72	23.7898697765433	231.2992	181.5938	176.4496	211.132	228.397	195.9747	168.4571	139.1957	186.0363	226.5782
	60	650	12	72	23.7898697765433	119.7592	121.0163	137.6944	117.1533	130.4081	127.8595	106.4262	139.1957	133.8502	111.9581
	70	650	12	72	0	8.219143	22.57852	5.024193	23.17459	20.18696	34.57238	22.2805	16.67077	-13.306	-2.66196
	50	550	15	72	82.8777646111912	248.0281	213.2168	297.3676	230.8144	195.1895	235.4511	243.5253	231.5146	291.0018	252.7167
	60	550	15	72	168.051182397028	136.4881	223.8725	200.1152	136.8357	237.0326	216.8064	244.5402	231.5146	197.4198	138.0966
	70	550	15	72	257.956456726523	24.94802	64.91874	90.50161	42.85698	38.53483	107.3976	44.41643	86.41918	93.81427	23.47656
	50	600	15	72	340.693671143348	234.4317	176.1666	205.9274	214.8585	166.8566	196.7255	155.7853	193.863	190.0771	234.0676
	60	600	15	72	413.873472343281	122.8916	186.437	119.963	120.8799	196.4327	180.8768	197.667	193.863	156.1139	119.4475
	70	600	15	72	470.562050737594	11.35158	18.26975	0.065051	26.90117	24.30587	54.76132	14.90445	16.67077	-10.0634	4.827468
	50	650	15	72	541.49304882767	220.8352	200.0812	202.3437	198.9027	249.4781	170.5221	259.7013	139.1957	209.3253	215.4185
	60	650	15	72	600.617830590996	109.2952	83.04882	61.59515	104.924	37.34086	128.3154	54.04921	139.1957	58.65281	100.7984
	70	650	15	72	643.251389548703	-2.24486	22.80377	-40.5338	10.94536	33.75991	35.41224	5.444084	16.67077	-34.048	-13.8216
	50	550	0	96	0	335.9152	294.2823	274.5274	332.1111	313.0149	260.5055	294.1922	302.4496	287.6564	344.0507
	60	550	0	96	6.21269761335661	224.3752	293.0949	308.5111	238.1324	281.4838	270.6898	283.0035	302.4496	310.8768	229.4306
	70	550	0	96	21.4418227898194	112.8351	170.9168	144.0998	144.1537	260.6736	131.4119	199.5307	114.5369	166.5123	114.8105
	50	600	0	96	42.5864079672723	322.3188	245.2214	234.5354	316.1553	253.9902	244.3732	230.1593	256.4557	224.3203	325.4016
	60	600	0	96	65.2337310719094	210.7787	293.5842	279.807	222.1766	298.3202	253.6765	329.6814	256.4557	307.1594	210.7815
	70	600	0	96	83.3728403949935	99.23866	82.74648	105.1114	128.1979	42.392	100.2628	72.47265	114.5369	100.2235	96.16145
	50	650	0	96	101.607441425825	308.7223	306.5292	320.0215	300.1995	316.5439	273.7023	314.3532	300.9142	317.2658	306.7525
	60	650	0	96	122.964534997021	197.1823	295.9406	310.5089	206.2208	307.9857	274.3196	299.5865	300.9142	283.3961	192.1324
	70	650	0	96	153.975581312553	85.64222	117.2128	153.5823	112.2421	113.5915	122.1843	133.8282	114.5369	149.9364	77.51236
	50	550	3	96	183.908906488388	325.4512	281.8245	263.6765	319.8819	276.196	268.2724	286.0673	302.4496	254.9508	332.891
	60	550	3	96	212.233239540166	213.9112	295.4717	298.3068	225.9032	298.1699	271.2058	286.2325	302.4496	302.724	218.2709
	70	550	3	96	9.5574132168926	102.3711	99.87491	72.46743	131.9245	97.78579	126.3621	96.69612	53.31216	97.67601	103.6509
	50	600	3	96	14.3361198253389	311.8548	220.9446	233.4087	303.9261	251.5546	227.2595	223.2231	256.4557	190.8613	314.2419
	60	600	3	96	19.1148264337852	200.3147	290.2969	279.327	209.9474	296.5617	271.4173	301.6894	256.4557	298.2535	199.6219
	70	600	3	96	23.8935330422315	88.77466	31.89723	43.2033	115.9687	22.92094	77.91164	17.38606	12.88313	30.63377	85.00179
	50	650	3	96	28.6722396506777	298.2583	304.1622	309.5244	287.9703	323.499	271.4577	288.1918	300.9142	311.1727	295.5928
	60	650	3	96	31.0615929549009	186.7183	288.3928	300.6586	193.9916	303.8155	268.1897	310.3747	300.9142	301.8558	180.9728
	70	650	3	96	33.450946259124	75.17822	91.10854	82.30386	100.0129	94.91597	106.66	104.7632	109.6281	107.7124	66.35269
	50	550	6	96	38.2296528675703	314.9872	300.5532	274.7833	307.6527	307.0366	275.5048	292.5612	302.4496	270.5892	321.7314
	60	550	6	96	43.0083594760166	203.4472	311.23	300.2858	213.674	315.5152	276.6657	328.017	302.4496	323.2438	207.1113
	70	550	6	96	0	91.9071	57.60768	61.06539	119.6953	41.68254	111.2747	63.34155	53.31216	45.29746	92.49121
	50	600	6	96	27.0197670705604	301.3908	232.8033	241.0302	291.6969	229.8371	219.4439	208.6086	256.4557	214.3826	303.0823
	60	600	6	96	114.39062240419	189.8507	285.8116	277.8207	197.7182	277.3223	266.5595	251.1858	256.4557	326.656	188.4622
	70	600	6	96	181.207760320586	78.31066	22.40518	28.316	103.7395	29.71967	34.42943	34.63753	16.67077	-13.8619	73.84212
	50	650	6	96	244.733998125054	287.7943	288.5131	303.4014	275.741	301.6608	260.0097	261.3047	300.9142	304.2328	284.4332
	60	650	6	96	306.705110063532	176.2543	283.9668	285.4077	181.7624	302.9116	239.1825	291.4551	300.9142	299.7971	169.8131
	70	650	6	96	354.386111817677	64.71422	29.32155	53.672	87.78367	37.29205	74.72634	16.4747	16.67077	32.75532	55.19303
	50	550	9	96	384.575216685508	304.5232	303.0391	298.1198	295.4234	325.5762	280.4618	319.2335	302.4496	318.8533	310.5717
	60	550	9	96	408.406273478374	192.9832	283.0303	318.9403	201.4447	273.3811	286.104	304.4693	302.4496	312.7184	195.9516
	70	550	9	96	429.059759169789	81.4431	115.287	113.6675	107.4661	142.9627	96.15777	101.0045	86.41918	151.6858	81.33155
	50	600	9	96	0	290.9268	225.121	222.7382	279.4676	218.6831	220.1036	203.7649	250.4233	205.8266	291.9226
	60	600	9	96	88.1739853907189	179.3867	264.4825	254.8467	185.4889	258.3582	260.122	295.7791	250.4233	259.3106	177.3025
	70	600	9	96	169.349320263285	67.84666	21.66062	39.28961	91.51025	32.18253	57.16012	20.90381	16.67077	35.70663	62.68246
	50	650	9	96	248.166740690894	277.3303	274.6308	225.5213	263.5118	294.6251	246.2256	234.1156	189.0505	231.8439	273.2735
	60	650	9	96	308.496309642439	165.7903	203.9037	202.8456	169.5331	227.198	198.2684	183.4081	189.0505	168.6188	158.6534
	70	650	9	96	364.110049704069	54.25022	30.58111	5.057514	75.55444	21.90888	41.19398	34.10645	16.67077	18.49109	44.03337
	50	550	12	96	405.876674362831	294.0592	298.3388	312.2959	283.1942	296.0365	295.528	263.4073	302.4496	291.3436	299.412
	60	550	12	96	433.721090802005	182.5192	297.5476	315.5218	189.2155	304.23	269.2247	313.6195	302.4496	294.1615	184.792
	70	550	12	96	454.566856723027	70.9791	97.40166	113.3441	95.23683	122.5561	110.2357	92.5841	86.41918	88.96368	70.17188
	50	600	12	96	470.846979387572	280.4628	256.0492	249.9615	267.2384	263.2506	226.1673	252.0835	250.4233	240.2958	280.7629
	60	600	12	96	484.769187607159	168.9227	274.5559	264.4753	173.2597	280.1099	250.8213	294.3555	250.4233	302.7325	166.1429
	70	600	12	96	9.51632770146269	57.38266	21.18488	52.01339	79.28102	26.45832	54.98822	19.67353	16.67077	34.9631	51.52279
	50	650	12	96	25.499641303578	266.8663	282.0955	245.1183	251.2826	291.1137	245.3833	237.3183	189.0505	240.175	262.1138
	60	650	12	96	46.2937333705721	155.3263	189.8609	204.848	157.3039	203.0123	155.9356	149.5742	189.0505	185.9027	147.4938
	70	650	12	96	71.898603902445	43.78622	25.7561	10.15505	63.32521	23.02482	44.23266	24.55462	16.67077	-8.39062	32.8737
	50	550	15	96	97.5034744343179	283.5952	284.3833	364.7657	270.965	274.6196	283.7769	333.6829	302.4496	352.8935	288.2524
	60	550	15	96	121.504752144565	172.0552	293.77	265.9982	176.9863	304.2491	266.0387	310.3408	302.4496	257.2248	173.6323
	70	550	15	96	135.884472925054	60.5151	76.08014	94.36183	83.00761	59.40277	128.4267	61.54008	86.41918	106.4824	59.01222
	50	600	15	96	145.453415240664	269.9988	235.1093	269.5317	255.0092	214.0833	246.8741	214.1736	250.4233	239.9605	269.6033
	60	600	15	96	153.418764734648	158.4587	237.8358	182.0522	161.0305	248.5074	216.9184	251.9138	250.4233	203.9113	154.9832
	70	600	15	96	0	46.91866	20.95217	0.131503	67.0518	27.49617	52.06733	26.99211	16.67077	-9.4032	40.36313
	50	650	15	96	34.9497373668815	256.4023	292.5551	266.7238	239.0534	333.4285	221.7574	336.7913	189.0505	263.7822	250.9542
	60	650	15	96	90.2825406406877	144.8623	119.1312	124.4601	145.0747	75.4979	156.0875	82.11987	189.0505	111.0234	136.3341
	70	650	15	96	143.991208335153	33.32222	26.06808	-39.6916	51.09599	41.95533	45.19791	10.93024	16.67077	-28.8144	21.71404
	50	550	0	120	189.777694460043	371.4823	360.9514	340.8622	372.2617	374.0849	310.3016	350.5464	338.1762	367.1574	379.5863
	60	550	0	120	238.594229073415	259.9422	328.0339	370.85	278.2831	303.0696	316.9017	328.2756	338.1762	372.4527	264.9663
	70	550	0	120	292.085496028641	148.4022	193.4663	149.9728	184.3044	290.5918	155.0062	221.8555	247.396	188.3636	150.3462
	50	600	0	120	336.217435128625	357.8858	315.5993	296.6856	356.3059	298.3549	298.299	294.6482	298.119	292.7269	360.9373
	60	600	0	120	364.566244946069	246.3458	355.5728	337.9614	262.3272	351.662	301.8321	380.3785	373.1492	357.6414	246.3172
	70	600	0	120	380.380196639655	134.8057	90.81609	106.7999	168.3486	46.10583	118.0204	89.30168	130.753	110.981	131.6971
	50	650	0	120	0	344.2894	386.7457	382.5276	340.3501	383.2876	334.3217	385.9939	370.4126	388.3647	342.2882
	60	650	0	120	85.2162508832812	232.7494	374.7875	369.0193	246.3714	363.3996	331.4122	365.3118	370.4126	336.5697	227.6681
	70	650	0	120	163.841182306637	121.2093	114.3079	155.6267	152.3927	112.7274	147.3038	160.8026	186.6109	163.3856	113.048
	50	550	3	120	240.904444903703	361.0183	338.7846	328.117	360.0325	321.0954	318.8367	341.9356	338.1762	326.7505	368.4267
	60	550	3	120	308.472819253845	249.4782	337.7218	358.7515	266.0538	329.0196	319.2966	336.9959	338.1762	356.5986	253.8066
	70	550	3	120	359.921583940417	137.9382	101.4262	76.44617	172.0751	122.6455	148.06	115.7589	176.7976	111.8262	139.1865
	50	600	3	120	403.284164254218	347.4218	305.9029	293.6646	344.0767	291.5445	278.4767	281.5498	298.119	251.5672	349.7776
	60	600	3	120	429.018225160127	235.8818	355.9579	335.5871	250.098	351.4222	322.0288	354.9167	373.1492	341.0342	235.1575
	70	600	3	120	451.490028292796	124.3417	35.63107	42.99747	156.1193	22.84415	92.60579	23.79895	12.88313	33.69009	120.5374
	50	650	3	120	469.137904825934	333.8254	373.2692	370.1363	328.1209	383.0572	332.2818	357.9747	370.4126	374.5704	331.1285
	60	650	3	120	480.400185933253	222.2854	371.2913	357.2747	234.1422	373.7891	326.6373	378.4603	370.4126	347.3283	216.5084
	70	650	3	120	7.2326370289998	110.7453	96.85784	82.45396	140.1635	98.97507	128.7319	116.8631	109.6281	113.4604	101.8884
	50	550	6	120	9.65427889138814	350.5543	367.9571	339.646	347.8033	357.3942	328.1388	352.1067	365.7723	344.3009	357.267
	60	550	6	120	12.0759207537765	239.0142	378.3471	361.1527	253.8246	362.3612	323.9969	377.897	365.7723	379.0304	242.6469
	70	550	6	120	14.4975626161648	127.4742	54.92381	65.46636	159.8459	42.99986	131.7112	74.56774	38.32605	61.3597	128.0269
	50	600	6	120	14.4975626161648	336.9578	315.3624	301.7084	331.8475	281.4407	267.9948	261.6176	298.119	277	338.6179
	60	600	6	120	14.4975626161648	225.4178	342.9063	334.503	237.8688	326.6638	317.6246	307.3137	373.1492	371.3487	223.9979
	70	600	6	120	14.4975626161648	113.8777	28.023	28.53241	143.8901	29.95111	41.36612	32.59947	29.23425	-8.89352	109.3778
	50	650	6	120	14.4975626161648	323.3614	359.3684	364.4355	315.8917	355.147	320.1818	329.2164	370.4126	369.5424	319.9688
	60	650	6	120	14.4975626161648	211.8214	381.9711	342.446	221.913	386.6642	294.6274	358.0355	370.4126	347.1816	205.3488
	70	650	6	120	0	100.2813	34.08341	54.24434	127.9343	42.18858	89.65559	20.55041	29.23425	40.41539	90.72869
	50	550	9	120	42.4758789242532	340.0903	386.3785	360.9201	335.5741	382.0843	335.1493	382.9736	365.7723	389.1049	346.1074
	60	550	9	120	100.839563869325	228.5502	397.3871	377.7448	241.5954	314.4135	335.3623	351.9013	365.7723	365.0449	231.4873
	70	550	9	120	162.620609719038	117.0102	119.5993	116.006	147.6167	136.8916	115.4209	112.9025	212.8875	164.2876	116.8672
	50	600	9	120	216.573182366695	326.4938	276.3529	281.354	319.6182	268.6555	268.1906	254.2473	295.5287	264.984	327.4583
	60	600	9	120	273.795549008256	214.9538	308.8403	309.4666	225.6396	311.506	308.9427	349.1321	352.719	300.5432	212.8382
	70	600	9	120	323.147518452424	103.4137	28.18476	37.4436	131.6609	34.99205	67.48476	18.22781	29.23425	37.21473	98.21812
	50	650	9	120	364.502208143775	312.8974	275.4125	284.493	303.6624	331.3617	303.6156	300.3729	338.6677	293.6935	308.8092
	60	650	9	120	386.804385451099	201.3574	224.5364	257.8215	209.6837	300.5921	247.6111	238.5029	183.8848	212.5431	194.1891
	70	650	9	120	412.187976415665	89.8173	38.0876	3.567427	115.7051	24.01503	49.79155	35.98599	29.23425	22.6909	79.56903
	50	550	12	120	0	329.6263	360.6763	374.0186	323.3448	345.051	350.2134	332.187	365.7723	358.1628	334.9477
	60	550	12	120	87.3767920959707	218.0862	363.1649	373.2487	229.3661	349.3022	316.3519	364.7059	365.7723	343.0555	220.3276
	70	550	12	120	148.856842643136	106.5462	106.3546	114.6051	135.3875	118.3631	129.4979	106.014	82.09947	98.13328	105.7075
	50	600	12	120	228.150512695035	316.0298	301.4441	307.4996	307.389	302.5901	273.9142	302.4998	295.5287	296.0207	316.2986
	60	600	12	120	288.027117836718	204.4898	333.9921	318.0177	213.4103	340.2411	297.4705	344.4212	352.719	340.5326	201.6785
	70	600	12	120	334.955352203998	92.94974	26.4563	49.08975	119.4316	27.09314	64.68769	22.37923	29.23425	33.03889	87.05846
	50	650	12	120	378.643748251984	302.4334	305.0616	303.0124	291.4332	319.4732	299.5398	303.9671	338.6677	298.5921	297.6495
	60	650	12	120	406.187865217381	190.8934	259.7841	258.7463	197.4545	260.3791	196.2841	188.6283	183.8848	226.3946	183.0294
	70	650	12	120	423.97951971656	79.3533	31.62214	7.587341	103.4758	23.24935	53.00372	27.71187	29.23425	-7.62319	68.40937
	50	550	15	120	436.916907988185	319.1623	465.8218	438.3373	311.1156	331.0812	335.9986	415.1329	441.9027	439.4958	323.788
	60	550	15	120	446.625440443293	207.6222	380.4131	335.574	217.1369	352.7258	319.1365	362.9289	441.9027	325.9018	209.168
	70	550	15	120	11.2799089524798	96.08218	87.58844	107.4717	123.1582	69.13325	151.3977	75.86562	82.09947	135.4352	94.54788
	50	600	15	120	14.4982215663314	305.5658	288.5314	338.9187	295.1598	253.817	300.6304	268.6103	295.5287	315.4688	305.1389
	60	600	15	120	19.3309620884419	194.0258	283.2192	247.4434	201.1811	291.4326	257.7247	297.1852	352.719	261.4941	190.5189
	70	600	15	120	24.1637026105523	82.48574	24.65835	9.056764	107.2024	27.76405	61.79218	36.00724	29.23425	8.455797	75.89879
	50	650	15	120	27.4035409298474	291.9694	347.543	336.4667	279.204	397.2394	270.243	411.4083	338.6677	341.9825	286.4898
	60	650	15	120	30.6433792491424	180.4294	156.1351	190.2073	185.2253	123.1867	194.1988	107.4411	183.8848	171.2985	171.8698
	70	650	15	120	32.2687896601786	68.8893	31.26012	-30.4104	91.24661	46.82049	54.6903	17.24309	29.23425	-8.26374	57.2497
	50	550	0	155	33.8942000712148	423.3509	390.7563	389.4406	430.8147	418.2922	368.0126	405.8916	367.3107	407.7024	431.4092
	60	550	0	155	35.5196104822509	311.8109	351.3039	415.7606	336.836	330.6357	367.0787	373.7668	367.3107	412.786	316.7891
	70	550	0	155	0	200.2708	207.017	162.9296	242.8574	319.2585	188.997	242.3065	247.396	195.4936	202.169
	50	600	0	155	24.9781696309825	409.7545	353.8001	343.9941	414.8589	357.0615	363.7502	369.5417	298.119	336.4704	412.7601
	60	600	0	155	114.388830657145	298.2145	395.1436	381.602	320.8802	406.7509	363.4742	431.8749	373.1492	401.1732	298.14
	70	600	0	155	142.653384527571	186.6744	93.22343	118.4868	226.9015	54.07893	153.9473	111.428	130.753	121.3092	183.52
	50	650	0	155	205.34980302417	396.1581	432.2597	436.3612	398.9031	476.0119	406.916	475.7147	425.0285	433.4905	394.111
	60	650	0	155	261.778458918309	284.618	420.7151	419.185	304.9244	421.9916	398.5648	439.5184	425.0285	381.4838	279.4909
	70	650	0	155	293.04399480959	173.078	151.4879	173.8387	210.9457	148.4418	184.3474	191.612	186.6109	175.0963	164.8709
	50	550	3	155	313.367174488775	412.8869	360.7196	367.5073	418.5855	353.8886	379.3748	397.8751	367.3107	365.5015	420.2495
	60	550	3	155	336.88588559315	301.3469	362.6495	394.474	324.6068	370.0822	370.0988	390.5027	367.3107	395.1378	305.6294
	70	550	3	155	355.698772432989	189.8068	137.5854	80.21489	230.6281	174.532	164.162	135.4652	176.7976	117.1618	191.0094
	50	600	3	155	0	399.2905	319.726	331.785	402.6297	347.1292	335.3969	347.6849	298.119	293.5164	401.6004
	60	600	3	155	78.5021589611812	287.7505	395.4864	370.0397	308.651	408.2406	370.7887	411.5105	373.1492	382.772	286.9804
	70	600	3	155	130.633004328761	176.2104	36.54879	45.49633	214.6723	23.74594	110.2498	32.72789	12.88313	42.22422	172.3603
	50	650	3	155	210.766923779043	385.6941	414.4227	414.7818	386.6739	464.2317	399.7658	443.8401	425.0285	417.9022	382.9513
	60	650	3	155	270.847852070786	274.154	432.3938	398.2523	292.6952	459.3464	398.389	458.7155	425.0285	390.4483	268.3313
	70	650	3	155	329.447205506866	162.614	103.6147	91.47787	198.7165	118.6383	136.1131	129.299	109.6281	123.377	153.7112
	50	550	6	155	378.845699256211	402.4229	387.1092	378.3813	406.3563	399.4656	391.5509	415.7108	404.544	386.4135	409.0899
	60	550	6	155	405.07658286436	290.8829	398.2605	396.2202	312.3776	409.484	363.3991	428.3593	404.544	420.9313	294.4698
	70	550	6	155	431.397834580149	179.3428	61.70176	68.58008	218.3989	52.84749	145.8155	85.78268	38.32605	70.05729	179.8497
	50	600	6	155	448.37779662375	388.8265	353.5339	339.1738	390.4005	366.9759	330.1887	321.5089	298.119	322.3111	390.4408
	60	600	6	155	460.732297885078	277.2865	392.4858	368.3006	296.4218	385.8358	372.8929	368.4174	373.1492	416.4481	275.8207
	70	600	6	155	7.18578696421111	165.7464	30.49647	30.37626	202.4431	29.71197	63.18281	28.34615	29.23425	3.002327	161.2006
	50	650	6	155	11.9499320660339	375.2301	410.2111	408.426	374.4447	431.0835	391.4846	411.9451	425.0285	416.2357	371.7917
	60	650	6	155	11.9499320660339	263.69	452.7909	382.7686	280.466	485.8575	364.4142	440.106	425.0285	393.6633	257.1716
	70	650	6	155	16.7140771678567	152.15	40.30203	62.61324	186.4873	54.12635	107.1426	23.84699	29.23425	53.69389	142.5515
	50	550	9	155	21.4782222696794	391.9589	393.0874	394.8903	394.1271	431.4941	403.6692	454.4841	404.544	431.5109	397.9302
	60	550	9	155	26.2423673715022	280.4189	360.4431	408.0472	300.1484	351.2975	382.6729	396.2951	404.544	407.239	283.3101
	70	550	9	155	31.006512473325	168.8788	126.7898	114.3547	206.1697	125.5115	132.2938	126.7585	212.8875	173.2785	168.6901
	50	600	9	155	33.4281543357133	378.3625	306.2113	314.0543	378.1712	334.605	327.5479	312.7494	295.5287	310.5885	379.2811
	60	600	9	155	35.8497961981017	266.8225	363.797	338.4991	284.1926	380.1812	350.6658	406.2135	352.719	345.9359	264.661
	70	600	9	155	0	155.2824	29.13051	34.52238	190.2139	44.17145	73.36147	11.27985	29.23425	49.40384	150.041
	50	650	9	155	67.5935474221022	364.7661	308.4503	323.7184	362.2154	375.8156	379.2937	381.3091	338.6677	340.6801	360.632
	60	650	9	155	146.190695587337	253.226	255.7541	293.3791	268.2367	376.0823	309.0117	307.3495	183.8848	259.3181	246.0119
	70	650	9	155	220.072014862658	141.686	41.98887	7.171256	174.2581	33.69256	61.45348	37.00332	29.23425	36.26256	131.3919
	50	550	12	155	268.802246725104	381.4949	390.7883	404.0793	381.8978	386.7632	415.3933	409.8871	404.544	397.8042	386.7705
	60	550	12	155	308.100820807722	269.9549	389.4026	399.6415	287.9191	396.7048	375.7395	414.6852	404.544	382.4851	272.1505
	70	550	12	155	342.683566000426	158.4148	104.949	109.0441	193.9404	109.5391	125.0422	122.8468	82.09947	104.3596	157.5304
	50	600	12	155	370.97853933991	367.8985	335.2699	336.2904	365.942	339.4137	330.1309	361.9427	295.5287	338.8606	368.1214
	60	600	12	155	394.557683789481	256.3585	383.1117	343.1406	271.9633	411.9825	346.4763	398.312	352.719	383.1607	253.5014
	70	600	12	155	414.992942312442	144.8184	26.31357	42.25895	177.9846	32.50761	71.52455	21.97673	29.23425	42.46349	138.8813
	50	650	12	155	0	354.3021	343.8917	338.3282	349.9862	354.2832	363.2572	386.4614	338.6677	342.8141	349.4723
	60	650	12	155	86.8716515335079	242.762	254.7543	290.3943	256.0075	286.9237	260.494	235.9473	183.8848	270.4049	234.8523
	70	650	12	155	158.022285264052	131.222	30.50066	7.281591	162.0288	30.73476	60.3858	30.89167	29.23425	3.183915	120.2322
	50	550	15	155	225.775547339092	371.0309	516.0377	493.3998	369.6686	390.7825	409.409	508.299	441.9027	475.1321	375.6109
	60	550	15	155	282.195836040427	259.4909	412.7837	386.9687	275.6899	401.2563	371.1804	418.5919	441.9027	361.3264	260.9908
	70	550	15	155	340.843636626377	147.9508	90.18562	126.9126	181.7112	72.29738	156.2855	93.88933	82.09947	137.6564	146.3707
	50	600	15	155	397.767720445668	357.4345	338.7371	392.7113	353.7128	298.2529	370.3648	332.1305	295.5287	354.3037	356.9618
	60	600	15	155	426.141757026663	245.8945	351.62	297.5682	259.7341	341.7977	309.058	347.8601	352.719	300.1172	242.3417
	70	600	15	155	453.221573227196	134.3544	24.7932	27.2278	165.7554	34.41808	92.0135	43.40344	29.23425	13.87521	127.7216
	50	650	15	155	473.911905648969	343.8381	423.8983	396.7844	337.757	474.7077	321.5979	505.3937	338.6677	382.1996	338.3127
	60	650	15	155	491.356640218591	232.298	222.5038	246.8571	243.7783	143.0599	237.6597	137.4825	183.8848	211.3037	223.6926
	70	650	15	155	9.55854614875804	120.758	32.25775	-5.71431	149.7996	56.53545	60.35929	24.42511	29.23425	-1.46174	109.0725
	50	550	0	168	14.3378192231371	442.6164	418.3577	440.9439	452.563	429.7425	380.3613	417.3714	425.4921	442.9419	450.6577
	60	550	0	168	15.9097621864418	331.0764	382.0606	462.9329	358.5843	339.7583	379.2815	385.2289	422.8709	441.541	336.0376
	70	550	0	168	20.6890352608208	219.5363	214.2442	196.4325	264.6056	325.941	189.3444	247.8256	247.396	201.511	221.4175
	50	600	0	168	23.8754061323844	429.02	379.1149	385.8476	436.6072	377.5919	382.2382	389.1353	361.765	370.4015	432.0086
	60	600	0	168	25.4473490956891	317.48	423.8229	419.1245	342.6285	420.1736	372.4993	444.5618	422.8709	428.6198	317.3885
	70	600	0	168	27.0192920589938	205.9399	146.1674	142.3398	248.6498	56.24616	156.1484	120.1879	130.753	126.0182	202.7684
	50	650	0	168	28.5912350222985	415.4236	463.7538	491.167	420.6514	510.1698	426.1494	501.4699	476.4819	483.3902	413.3595
	60	650	0	168	28.5912350222985	303.8835	446.3594	469.6598	326.6727	443.2051	423.1692	459.8433	476.4819	424.899	298.7394
	70	650	0	168	0	192.3435	218.2968	210.6441	232.694	172.7376	202.3952	201.0295	186.6109	195.7743	184.1193
	50	550	3	168	56.7669203900699	432.1524	386.7494	412.4462	440.3338	365.135	391.632	410.1309	396.7804	403.3859	439.498
	60	550	3	168	119.832022851659	320.6124	389.2656	435.0818	346.3551	385.478	376.7258	404.8593	422.8709	426.5378	324.8779
	70	550	3	168	162.451456571986	209.0723	182.9686	107.1533	252.3764	188.0784	180.0283	141.5918	176.7976	125.8242	210.2579
	50	600	3	168	220.769499488761	418.556	352.4021	367.074	424.3779	367.6805	355.4143	364.4021	361.765	330.0924	420.8489
	60	600	3	168	266.439127170997	307.016	420.9226	400.9977	330.3993	421.4572	398.4654	426.7101	422.8709	412.8636	306.2288
	70	600	3	168	301.125974546701	195.4759	40.51117	62.78488	236.4206	22.8607	134.7649	37.04469	12.88313	49.57821	191.6088
	50	650	3	168	329.504229632586	404.9596	441.226	463.0231	408.4221	496.8001	414.1278	467.932	476.4819	470.4468	402.1998
	60	650	3	168	349.991539247047	293.4195	458.109	442.1626	314.4435	482.5052	421.2387	482.229	476.4819	436.5085	287.5798
	70	650	3	168	368.906905898204	181.8795	114.752	121.7188	220.4648	127.2445	149.4927	132.7914	109.6281	146.6998	172.9597
	50	550	6	168	0	421.6884	421.8036	424.718	428.1045	413.8275	406.9775	431.4725	448.2164	420.8687	428.3383
	60	550	6	168	67.3736756547509	310.1484	431.1622	438.2258	334.1258	423.5905	366.2038	441.1965	422.8709	448.902	313.7183
	70	550	6	168	132.677593033232	198.6083	79.26685	96.9163	240.1472	56.53778	160.8413	89.41435	38.32605	75.29015	199.0982
	50	600	6	168	205.256102000367	408.092	396.164	375.8606	412.1487	395.3045	349.1266	336.7114	361.765	355.4579	409.6893
	60	600	6	168	256.650026257447	296.552	417.0374	400.6564	318.17	400.7756	394.9074	385.5066	422.8709	443.1104	295.0692
	70	600	6	168	308.043950514527	185.0119	32.30006	49.06262	224.1913	27.44819	84.72436	27.29134	29.23425	6.927017	180.4491
	50	650	6	168	343.351591697952	394.4956	445.0879	458.0651	396.1929	462.4881	412.4183	434.9659	476.4819	465.3512	391.0402
	60	650	6	168	364.429644732022	282.9555	497.3374	428.0768	302.2142	511.3355	386.4453	465.6947	476.4819	436.2943	276.4201
	70	650	6	168	380.835522833631	171.4155	43.17436	94.25194	208.2355	54.30647	135.3253	24.4791	29.23425	73.58722	161.8
	50	550	9	168	394.852047631016	411.2244	446.8206	441.3935	415.8753	449.096	415.6567	473.518	509.3672	464.5824	417.1787
	60	550	9	168	408.975104104387	299.6844	423.6769	450.2193	321.8966	363.5121	393.3175	406.4181	428.0805	433.826	302.5586
	70	550	9	168	9.49535209210758	188.1443	161.7911	142.8574	227.9179	127.9759	140.9357	131.7118	212.8875	177.128	187.9385
	50	600	9	168	9.49535209210758	397.628	332.4577	350.9076	399.9195	354.3708	347.5106	328.3923	335.3173	342.3516	398.5296
	60	600	9	168	11.8847053963307	286.088	414.489	371.0214	305.9408	397.3366	382.6246	421.949	428.9594	371.2145	283.9095
	70	600	9	168	16.601350879992	174.5479	32.24161	53.37518	211.9621	45.52482	82.9062	8.430048	29.23425	51.94509	169.2894
	50	650	9	168	21.3179963636533	384.0316	384.0634	373.524	383.9637	398.5191	378.2913	404.1468	420.4363	388.4119	379.8805
	60	650	9	168	21.3179963636533	272.4915	314.7408	338.8537	289.985	396.7324	331.9329	329.4182	298.0948	300.5654	265.2604
	70	650	9	168	23.6452885430914	160.9515	46.96295	38.9764	196.0063	35.9527	87.55163	36.78052	29.23425	54.77254	150.6404
	50	550	12	168	23.6452885430914	400.7604	419.5483	443.262	403.6461	403.2519	438.0276	430.5729	428.3915	424.4015	406.019
	60	550	12	168	23.6452885430914	289.2204	418.0898	434.4932	309.6674	413.3894	376.0976	427.2054	428.0805	402.5979	291.3989
	70	550	12	168	0	177.6803	132.6691	130.2264	215.6887	112.2643	159.5557	128.9919	119.8477	101.7346	176.7789
	50	600	12	168	155.113367065852	387.164	366.5354	365.8232	387.6903	348.9916	347.2979	378.3376	371.4886	364.1494	387.3699
	60	600	12	168	234.310858048021	275.624	419.7115	368.3424	293.7116	427.8194	368.7426	413.4335	428.9594	401.9651	272.7499
	70	600	12	168	305.541727652835	164.0839	29.08074	53.79135	199.7329	31.86491	100.7744	20.97614	29.23425	38.53045	158.1298
	50	650	12	168	372.067042504749	373.5676	393.6065	380.8134	371.7345	376.5128	370.5105	410.4668	420.4363	384.0716	368.7208
	60	650	12	168	408.586323685103	262.0275	286.4453	328.5485	277.7558	282.0833	266.1346	250.752	298.0948	305.1779	254.1008
	70	650	12	168	437.074561872222	150.4875	35.52451	31.76633	183.7771	32.87604	65.65119	31.36738	29.23425	15.21955	139.4807
	50	550	15	168	462.376429187778	390.2964	548.3575	528.8865	391.4169	415.6474	421.2678	533.5735	577.0902	508.0006	394.8593
	60	550	15	168	482.930256805481	278.7564	431.7448	418.1244	297.4382	416.7243	384.6581	434.3787	428.0805	387.7104	280.2393
	70	550	15	168	479.380958985845	167.2163	115.856	144.3988	203.4595	73.15506	184.8625	100.3126	119.8477	141.3027	165.6192
	50	600	15	168	179.206701617522	376.7	350.6708	418.5482	375.461	310.5115	378.735	349.406	371.4886	385.8638	376.2103
	60	600	15	168	236.730509860096	265.16	365.0936	319.074	281.4824	354.6098	319.8398	363.053	387.2731	325.1928	261.5902
	70	600	15	168	291.120436801439	153.6199	27.69498	35.06421	187.5037	36.08319	102.6904	44.74858	29.23425	16.21338	146.9701
	50	650	15	168	328.441963455962	363.1036	477.8649	435.5736	359.5052	500.8509	329.3208	533.7354	420.4363	429.7282	357.5612
	60	650	15	168	356.381865924467	251.5635	196.2192	281.3153	265.5265	131.5784	258.6318	146.6128	168.2706	252.348	242.9411
	70	650	15	168	381.269556933373	140.0235	37.5979	15.07444	171.5479	56.4016	69.48889	26.16712	29.23425	16.84506	128.321
	50	550	0	192	395.254920698616	478.1835	440.3194	473.0771	492.7136	453.3581	399.9277	425.7951	425.4921	472.5899	486.1933
	60	550	0	192	410.781802724647	366.6435	385.0038	481.3213	398.7349	353.1847	387.6771	400.7275	422.8709	461.9458	371.5733
	70	550	0	192	0	255.1034	199.722	203.7468	304.7562	330.4586	200.6391	256.9638	247.396	208.4228	256.9532
	50	600	0	192	105.286474616843	464.5871	404.6579	417.5424	476.7578	407.2186	411.5064	411.7209	396.9008	402.1339	467.5442
	60	600	0	192	151.567536956246	353.047	444.4028	437.0745	382.7791	443.93	391.4063	460.792	422.8709	451.109	352.9242
	70	600	0	192	186.640593252901	241.507	170.0917	149.2157	288.8004	58.59013	191.5025	138.6424	130.753	135.0141	238.3041
	50	650	0	192	215.332425634454	450.9906	509.643	518.5962	460.802	550.9054	448.3925	534.9619	507.683	527.4541	448.8952
	60	650	0	192	234.437999487594	339.4506	501.1058	483.3443	366.8233	484.8563	452.1917	487.8736	513.9915	459.7206	334.2751
	70	650	0	192	245.559832118978	227.9105	218.1963	213.2544	272.8446	217.1139	236.8077	216.7619	186.6109	217.1022	219.655
	50	550	3	192	255.088762547546	467.7195	413.09	447.3894	480.4844	393.4412	411.785	420.9253	396.7804	431.1677	475.0337
	60	550	3	192	263.015175669458	356.1795	405.0875	456.2803	386.5057	413.1696	381.0239	425.4429	422.8709	445.0764	360.4136
	70	550	3	192	270.941588791371	244.6394	186.1021	117.2776	292.527	190.4639	194.3534	152.6428	176.7976	130.8699	245.7935
	50	600	3	192	77.8751401389766	454.1231	382.9463	401.5789	464.5286	397.4331	396.0078	382.7491	396.9008	359.9586	456.3846
	60	600	3	192	131.993742913861	342.583	443.2528	421.7577	370.5499	445.2859	396.3677	448.462	422.8709	433.4865	341.7645
	70	600	3	192	208.244050591189	231.043	46.11958	72.4708	276.5712	22.94437	144.8485	47.80772	12.88313	56.70805	227.1444
	50	650	3	192	270.168221073989	440.5266	508.101	493.2624	448.5728	539.9386	443.0429	498.3899	507.683	512.6451	437.7355
	60	650	3	192	324.138146368722	328.9866	507.1519	458.6571	354.5941	521.2209	445.4979	517.5225	513.9915	469.4639	323.1154
	70	650	3	192	344.814935929692	217.4465	115.4001	127.1391	260.6154	141.3607	161.9589	138.5957	109.6281	166.1616	208.4953
	50	550	6	192	368.613952573827	457.2555	449.0176	456.3951	468.2552	443.5086	429.8544	449.5312	448.2164	445.033	463.874
	60	550	6	192	390.830616036358	345.7155	438.421	456.1582	374.2765	445.2177	379.3085	458.6092	422.8709	463.8231	349.2539
	70	550	6	192	406.696627132448	234.1754	79.67542	103.7745	280.2978	57.63497	165.2104	96.48742	38.32605	76.71829	234.6339
	50	600	6	192	420.980285046934	443.6591	420.4747	407.0994	452.2993	430.7765	380.5105	353.8919	396.9008	381.7065	445.2249
	60	600	6	192	89.3774329351578	332.119	431.322	418.1504	358.3207	423.9874	427.1596	411.0535	422.8709	460.1158	330.6048
	70	600	6	192	177.254182530342	220.579	32.01693	55.48245	264.342	25.16074	94.66266	27.30741	29.23425	10.43927	215.9848
	50	650	6	192	238.435102642324	430.0626	481.7792	485.0383	436.3435	503.8598	439.2475	464.0886	507.683	503.9322	426.5758
	60	650	6	192	293.409114790333	318.5226	527.8814	441.3052	342.3648	553.1652	393.3178	506.8118	592.5411	465.632	311.9558
	70	650	6	192	328.057545102376	206.9825	43.54128	96.40618	248.3862	51.85128	143.4322	25.42261	29.23425	89.43147	197.3357
	50	550	9	192	359.459599209577	446.7915	479.9295	471.2784	456.0259	485.7987	433.4679	497.7741	509.3672	489.023	452.7143
	60	550	9	192	389.279300135174	335.2515	420.9894	466.3595	362.0472	385.1109	411.0774	418.4658	428.0805	449.0235	338.0943
	70	550	9	192	411.228070073562	223.7114	170.0805	147.9234	268.0686	134.8711	163.5828	141.5364	212.8875	178.8326	223.4742
	50	600	9	192	433.176840011951	433.1951	351.8685	380.3542	440.0701	385.7571	378.2704	348.0071	335.3173	368.8766	434.0652
	60	600	9	192	0	321.655	419.4356	386.7232	346.0914	423.6274	397.0543	445.2508	428.9594	388.4964	319.4452
	70	600	9	192	9.42863886605294	210.115	33.78089	58.00286	252.1127	46.20672	93.03356	3.785111	29.23425	55.73386	204.8251
	50	650	9	192	44.8767244154062	419.5986	417.4801	398.705	424.1143	431.8617	409.7435	434.1659	493.6276	427.2693	415.4162
	60	650	9	192	82.6889458198615	308.0586	280.4777	350.2899	330.1356	431.0419	351.3173	366.1845	298.0948	330.1796	300.7961
	70	650	9	192	120.501167224317	196.5185	45.9159	39.3385	236.1569	36.7023	98.15693	35.82974	29.23425	70.89321	186.176
	50	550	12	192	139.400301787956	436.3275	441.0663	469.221	443.7967	439.4584	452.1848	456.6191	428.3915	447.0725	441.5547
	60	550	12	192	160.663572206697	324.7875	434.6933	446.7074	349.818	439.3674	390.1837	444.258	428.0805	416.0258	326.9346
	70	550	12	192	174.834435060132	213.2474	140.0461	131.3665	255.8393	115.5417	160.7768	141.0194	119.8477	101.6696	212.3145
	50	600	12	192	184.277026203363	422.7311	372.9694	391.3439	427.8409	368.2226	390.3984	399.9392	371.4886	388.9048	422.9056
	60	600	12	192	196.083753201695	311.191	435.0961	380.1183	333.8622	451.8512	363.1448	436.3674	428.9594	417.4773	308.2855
	70	600	12	192	205.526344344926	199.651	28.02179	54.49307	239.8835	27.3897	110.7074	18.77254	29.23425	40.5494	193.6654
	50	650	12	192	80.0648720064818	409.1346	426.2887	402.0684	411.8851	416.7242	380.7246	443.8957	493.6276	421.1594	404.2565
	60	650	12	192	141.091018875825	297.5946	279.8309	336.0587	317.9064	271.0857	290.8246	275.1406	298.0948	333.0224	289.6364
	70	650	12	192	225.865589235629	186.0545	32.22665	28.20247	223.9277	27.77047	71.10626	31.39266	29.23425	29.57051	175.0164
	50	550	15	192	302.952331346114	425.8635	587.4678	542.8636	431.5675	460.1221	447.8598	566.2648	577.0902	531.5957	430.395
	60	550	15	192	372.151313483429	314.3235	439.2082	418.3567	337.5888	438.923	383.0489	459.0003	428.0805	402.0627	315.7749
	70	550	15	192	387.687375596667	202.7834	127.98	133.557	243.6101	69.9713	185.5406	112.5061	119.8477	142.162	201.1549
	50	600	15	192	420.750289168192	412.2671	367.7206	432.0869	415.6117	329.306	418.959	371.6457	371.4886	411.5437	411.7459
	60	600	15	192	439.589082581482	300.727	373.3093	318.8679	321.633	373.804	340.5813	387.9245	387.2731	341.6295	297.1258
	70	600	15	192	458.427875994771	189.187	26.97296	23.78397	227.6543	36.64455	127.038	46.00301	29.23425	19.15676	182.5058
	50	650	15	192	474.098489315528	398.6706	493.0212	444.8467	399.6559	531.6777	342.5089	575.3661	493.6276	467.7405	393.0968
	60	650	15	192	86.1163204981905	287.1306	150.4753	276.8436	305.6772	114.1789	288.85	161.2781	168.2706	281.1169	278.4768
	70	650	15	192	178.843414828361	175.5905	36.17767	-0.47138	211.6985	43.13082	92.26233	28.24671	29.23425	32.12046	163.8567
	50	550	0	216	249.252854997757	513.7506	448.5726	490.1647	532.8642	464.4437	399.9277	419.0997	425.4921	496.3929	521.729
	60	550	0	216	327.67203121178	402.2106	408.3399	494.8246	438.8855	359.9085	388.236	411.6343	456.7614	484.0412	407.1089
	70	550	0	216	377.227379828801	290.6705	217.2821	196.8774	344.9069	323.8012	209.4578	266.2686	247.396	213.1165	292.4888
	50	600	0	216	417.20104943789	500.1542	415.4506	428.0083	516.9084	410.1264	425.6004	416.4821	396.9008	423.2026	503.0799
	60	600	0	216	445.946086461688	388.6141	460.7048	443.9562	422.9297	467.1935	418.0303	470.7236	456.7614	470.4702	388.4598
	70	600	0	216	466.691797659159	277.0741	142.1114	135.7247	328.951	70.31397	213.1142	161.1179	130.753	136.9739	273.8398
	50	650	0	216	492.228348360596	486.5577	530.9608	557.2802	500.9526	528.1067	452.7472	548.5132	507.683	557.9939	484.4308
	60	650	0	216	0	375.0177	510.3476	518.444	406.9739	509.8183	454.4925	505.9187	513.9915	488.5514	369.8107
	70	650	0	216	9.38824950965385	263.4776	243.4469	227.9814	312.9952	247.7368	244.4201	231.748	186.6109	228.5316	255.1907
	50	550	3	216	14.0823742644808	503.2866	417.8731	468.3475	520.635	422.6854	424.185	417.8872	396.7804	454.5312	510.5693
	60	550	3	216	18.7764990193077	391.7466	427.0341	473.6541	426.6563	428.1954	397.7281	440.9115	456.7614	466.7323	395.9493
	70	550	3	216	23.4706237741346	280.2065	169.4878	114.2787	332.6776	169.2936	204.852	164.445	176.7976	135.124	281.3292
	50	600	3	216	28.1647485289616	489.6902	391.7582	415.9153	504.6792	400.0257	418.9988	385.2804	396.9008	380.5878	491.9202
	60	600	3	216	32.8588732837885	378.1501	460.9403	432.5099	410.7005	470.9084	409.5764	464.7494	456.7614	452.4082	377.3002
	70	600	3	216	37.5529980386154	266.6101	46.44925	62.85028	316.7218	39.57258	162.1604	63.22575	12.88313	58.22826	262.6801
	50	650	3	216	40.6731087590398	476.0937	524.6934	535.8169	488.7234	519.8501	470.1079	509.5565	507.683	542.7443	473.2711
	60	650	3	216	43.7932194794641	364.5537	522.5147	497.6274	394.7447	550.2785	449.6674	544.3652	513.9915	497.8552	358.6511
	70	650	3	216	46.9133301998885	253.0136	124.1644	145.7367	300.766	160.2773	245.6519	144.6213	109.6281	177.1515	244.031
	50	550	6	216	87.0894166066321	492.8226	454.8388	477.7194	508.4058	468.9075	431.3844	454.5863	448.2164	465.6481	499.4097
	60	550	6	216	166.114607534265	381.2826	466.5694	473.8982	414.4271	448.6391	385.1668	470.5537	456.7614	482.7306	384.7896
	70	550	6	216	248.368654278416	269.7425	82.6204	101.1419	320.4484	55.81336	178.8595	104.8424	38.32605	78.22426	270.1695
	50	600	6	216	324.180817114122	479.2262	409.009	421.802	492.45	430.0727	408.9806	357.799	396.9008	399.5874	480.7606
	60	600	6	216	390.359171582244	367.6861	449.779	429.2688	398.4713	446.0432	429.2061	431.3519	456.7614	476.2892	366.1405
	70	600	6	216	445.215427059766	256.1461	34.22381	46.22813	304.4926	41.97474	138.5145	30.91257	29.23425	9.211244	251.5204
	50	650	6	216	477.501347270845	465.6297	491.5792	527.959	476.4942	483.6783	451.1214	475.4571	507.683	531.2833	462.1115
	60	650	6	216	503.345383573479	354.0897	556.2864	480.6417	382.5155	587.6343	415.6974	541.7342	592.5411	491.275	347.4914
	70	650	6	216	521.080348977442	242.5496	45.50734	115.37	288.5368	65.88854	190.8234	26.82672	29.23425	97.67312	232.8713
	50	550	9	216	535.541613345212	482.3586	489.9884	486.8325	496.1766	512.1113	451.2237	508.9278	509.3672	512.4114	488.25
	60	550	9	216	93.1836338314502	370.8186	438.8709	478.3293	402.1979	393.1267	404.5038	424.7215	453.8005	470.704	373.6299
	70	550	9	216	156.331803844887	259.2785	163.3824	139.5205	308.2192	140.9562	158.2148	152.9315	212.8875	183.1113	259.0099
	50	600	9	216	206.920338635439	468.7622	367.5169	389.2866	480.2207	400.6241	412.7813	356.5638	335.3173	389.5305	469.6009
	60	600	9	216	341.723654927967	357.2221	438.9485	392.0713	386.2421	451.3727	407.2689	463.5562	468.5947	407.4427	354.9808
	70	600	9	216	365.455986602047	245.6821	39.96907	42.97829	292.2634	61.0182	114.9203	0.900933	29.23425	57.27849	240.3608
	50	650	9	216	390.770671457731	455.1657	431.6484	435.8555	464.2649	420.1895	425.1462	448.6372	493.6276	457.3928	450.9518
	60	650	9	216	408.182350599553	343.6257	274.2286	383.8561	370.2862	457.3505	380.2177	399.4304	341.0952	358.5955	336.3317
	70	650	9	216	419.241302482463	232.0856	50.10889	52.53203	276.3076	43.05088	149.7675	34.72382	29.23425	81.90754	221.7117
	50	550	12	216	435.038553716026	471.8946	448.2714	483.0973	483.9473	462.6583	453.6195	467.6997	428.3915	468.2722	477.0903
	60	550	12	216	0	360.3546	448.6518	456.9995	389.9686	440.018	400.4104	456.1478	453.8005	435.5179	362.4703
	70	550	12	216	34.519146104424	248.8145	128.3106	121.2858	295.99	114.0768	182.6599	154.5763	119.8477	103.7598	247.8502
	50	600	12	216	76.8005214432865	458.2982	397.0441	398.5985	467.9915	381.7543	432.8982	411.1894	371.4886	407.3703	458.4412
	60	600	12	216	115.913385117211	346.7581	455.3095	383.7887	374.0128	476.8512	377.5895	455.0891	468.5947	434.2352	343.8212
	70	600	12	216	145.619216749636	235.2181	29.91379	37.79076	280.0341	37.12843	126.8804	17.02757	29.23425	39.90565	229.2011
	50	650	12	216	172.218101062944	444.7017	458.1758	437.5412	452.0357	422.2934	378.4436	463.7138	493.6276	449.0944	439.7922
	60	650	12	216	187.850323240612	333.1617	265.1949	367.9472	358.057	274.8402	314.6181	297.1665	341.0952	359.2499	325.1721
	70	650	12	216	211.317634496475	221.6216	35.91821	39.71827	264.0783	14.70371	114.6556	30.77198	29.23425	38.39647	210.552
	50	550	15	216	225.402539449167	461.4306	593.0884	568.4058	471.7181	471.5837	447.8598	581.6058	577.0902	552.5398	465.9307
	60	550	15	216	236.356888715642	349.8906	449.9843	440.3146	377.7394	433.671	391.8296	480.1219	453.8005	421.2984	351.3106
	70	550	15	216	244.179664924673	238.3505	126.1421	135.1423	283.7607	62.77268	199.3519	125.7215	119.8477	143.9962	236.6905
	50	600	15	216	80.857318735367	447.8342	390.4649	451.0075	455.7623	337.6113	426.9418	382.2249	371.4886	429.7527	447.2816
	60	600	15	216	146.000713224314	336.2941	384.687	334.2042	361.7836	388.0175	346.4392	410.7909	387.2731	358.131	332.6615
	70	600	15	216	223.640994177524	224.7541	28.92162	18.7476	267.8049	46.83666	138.968	46.57582	29.23425	18.25693	218.0414
	50	650	15	216	288.933483841208	434.2377	523.3711	491.9854	439.8065	514.7359	346.0142	603.6015	493.6276	495.4191	428.6325
	60	650	15	216	340.254046636023	322.6977	171.2523	320.398	345.8278	136.4416	281.359	174.143	168.2706	307.0879	314.0124
	70	650	15	216	382.201060619153	211.1576	37.76797	22.71036	251.8491	21.86196	105.046	29.39795	29.23425	40.6903	199.3923
	50	550	0	240	407.080507603416	549.3177	345.8517	399.7589	573.0149	433.6428	412.5357	399.8497	425.4921	443.2211	557.2647
	60	550	0	240	419.459532269469	437.7776	392.3172	558.4687	479.0362	346.29	388.236	421.1112	456.7614	514.5892	442.6446
	70	550	0	240	436.527099268337	326.2376	221.2969	205.1348	385.0575	303.2732	229.1349	276.9782	247.396	226.371	328.0245
	50	600	0	240	450.499026137206	535.7212	368.7691	309.2255	557.059	374.0192	426.4513	404.9042	396.9008	369.0374	538.6156
	60	600	0	240	87.9583594862186	424.1812	466.0202	479.2233	463.0804	462.9611	407.255	477.967	456.7614	500.0247	423.9955
	70	600	0	240	172.989481430855	312.6411	159.0917	115.6052	369.1017	105.5198	217.8365	188.188	130.753	149.2348	309.3754
	50	650	0	240	253.209824910612	522.1248	400.8331	354.5465	541.1032	440.1052	473.1271	542.2501	507.683	450.9765	519.9665
	60	650	0	240	306.732662093482	410.5848	515.2297	469.7602	447.1245	485.337	457.0423	517.3704	513.9915	465.2544	405.3464
	70	650	0	240	349.186148504962	299.0447	228.6861	123.911	353.1459	257.7047	279.3488	247.3664	186.6109	187.941	290.7263
	50	550	3	240	404.188429387784	538.8537	398.8297	406.6405	560.7856	423.4166	425.7926	403.6098	396.7804	424.6307	546.105
	60	550	3	240	430.980885259637	427.3136	426.0161	565.997	466.8069	404.9459	381.448	454.1763	456.7614	520.5518	431.4849
	70	550	3	240	446.735640218423	315.7736	146.0453	151.235	372.8283	149.3605	204.852	177.8215	176.7976	171.65	316.8648
	50	600	3	240	467.175799364609	525.2572	373.8366	325.8314	544.8298	365.3513	421.9924	374.1468	396.9008	349.694	527.4559
	60	600	3	240	0	413.7172	470.7875	496.4759	450.8511	469.1826	431.6402	478.5857	456.7614	505.2342	412.8358
	70	600	3	240	28.8812048555518	302.1771	56.64154	71.42961	356.8724	83.66795	187.7495	83.96959	12.88313	93.76083	298.2158
	50	650	3	240	48.618030566913	511.6608	385.6004	361.782	528.874	429.3131	477.8075	502.4069	507.683	458.9988	508.8068
	60	650	3	240	68.3548562782741	400.1208	529.249	477.6424	434.8953	535.2029	446.0249	565.5653	513.9915	497.8295	394.1867
	70	650	3	240	79.0124420749176	288.5807	110.1891	70.36505	340.9166	186.4318	252.9776	151.8689	109.6281	159.8323	279.5667
	50	550	6	240	89.6700278715613	528.3897	453.35	413.0104	548.5564	464.3387	428.0855	449.0323	448.2164	415.1966	534.9453
	60	550	6	240	94.2096478289201	416.8496	464.4276	563.2391	454.5777	413.0204	397.1151	479.974	456.7614	515.999	420.3253
	70	550	6	240	103.288887743638	305.3096	85.21516	135.096	360.599	68.25444	194.9135	115.0336	38.32605	94.19927	305.7052
	50	600	6	240	109.341714353449	514.7932	377.0185	328.716	532.6006	387.2129	427.6201	350.9019	396.9008	348.1425	516.2962
	60	600	6	240	116.907747615714	403.2532	453.7596	490.2327	438.6219	444.2945	450.0714	449.0967	456.7614	508.5642	401.6762
	70	600	6	240	118.420954268167	291.7131	43.84296	51.80538	344.6432	87.07404	168.0647	38.9488	29.23425	24.19285	287.0561
	50	650	6	240	50.1978606645486	501.1968	307.9353	350.9221	516.6448	396.994	456.5635	470.8868	507.683	426.9862	497.6471
	60	650	6	240	110.801981877816	389.6568	550.7764	457.6546	422.6661	575.9757	425.6421	572.6287	592.5411	470.6983	383.0271
	70	650	6	240	195.299636133316	278.1167	39.59801	36.99627	328.6874	107.4286	196.1085	29.43606	29.23425	59.80305	268.407
	50	550	9	240	260.888073010982	517.9257	494.5983	461.7138	536.3272	496.043	451.2882	509.121	509.3672	502.4919	523.7857
	60	550	9	240	482.491184795388	406.3856	452.057	607.2605	442.3485	370.3182	394.582	428.1012	453.8005	544.5046	409.1656
	70	550	9	240	528.758050221682	294.8456	175.8507	213.0651	348.3698	153.8731	178.5169	166.3783	212.8875	239.6185	294.5455
	50	600	9	240	554.289923932132	504.3292	373.8089	335.7909	520.3714	379.3754	423.8158	356.4675	335.3173	378.6179	505.1366
	60	600	9	240	568.733960112805	392.7892	450.2219	492.6256	426.3927	456.7155	424.5281	479.3886	468.5947	480.2498	390.5165
	70	600	9	240	584.690245220202	281.2491	48.99433	88.1459	332.414	101.6663	157.2999	0.655048	29.23425	112.7924	275.8964
	50	650	9	240	600.646530327598	490.7328	354.234	298.4089	504.4156	357.8671	427.7395	449.9096	493.6276	393.6286	486.4875
	60	650	9	240	92.7374880927759	379.1928	290.7651	400.4594	410.4369	451.1032	366.8303	431.0082	341.0952	378.5511	371.8674
	70	650	9	240	176.102942654949	267.6527	36.75866	13.74869	316.4582	69.25865	155.4786	34.08439	29.23425	84.56974	257.2473
	50	550	12	240	257.896454253817	507.4617	458.0438	434.4163	524.0979	441.8761	455.8281	465.8469	428.3915	429.6734	512.626
	60	550	12	240	316.073045765762	395.9216	453.9815	562.3684	430.1193	398.9509	401.5703	465.4562	453.8005	480.6389	398.0059
	70	550	12	240	358.526532177243	284.3816	134.8081	171.2681	336.1406	124.151	182.6599	170.1637	119.8477	131.5873	283.3859
	50	600	12	240	397.834907506308	493.8652	397.6672	321.5406	508.1421	366.3415	443.6709	414.3241	371.4886	367.7781	493.9769
	60	600	12	240	424.59571351984	382.3252	460.7411	460.7806	414.1635	476.2196	366.6932	471.7876	468.5947	478.3628	379.3568
	70	600	12	240	438.746875657	270.7851	31.20021	59.39606	320.1848	77.34944	151.4672	16.66557	29.23425	66.73987	264.7368
	50	650	12	240	459.187034803185	480.2688	382.9836	276.5323	492.1863	377.3948	378.4436	472.3416	493.6276	356.6507	475.3278
	60	650	12	240	0	368.7288	278.8898	360.9882	398.2076	286.0446	326.0748	318.4258	341.0952	350.5259	360.7077
	70	650	12	240	11.8443974594529	257.1887	11.99322	-22.6274	304.229	18.12055	114.6556	30.09605	29.23425	12.37906	246.0877
	50	550	15	240	23.6417310879412	496.9977	595.2124	518.1075	511.8687	426.478	449.7726	581.7564	577.0902	508.2214	501.4663
	60	550	15	240	35.4625966319118	385.4576	472.4442	544.0662	417.89	386.0676	391.8296	499.8152	453.8005	460.7002	386.8463
	70	550	15	240	42.5409968090047	273.9176	117.843	183.5072	323.9113	71.40724	209.2012	140.4464	119.8477	166.1044	272.2262
	50	600	15	240	54.3618623529754	483.4012	393.3416	372.3322	495.9129	322.5899	439.3352	383.3924	371.4886	384.4413	482.8172
	60	600	15	240	80.3159963356496	371.8612	393.5498	409.5788	401.9342	381.3437	342.2456	433.6121	387.2731	396.5393	368.1972
	70	600	15	240	113.348530495417	260.3211	28.57935	38.73556	307.9555	81.23633	154.7047	47.45802	29.23425	39.37172	253.5771
	50	650	15	240	129.8647975753	469.8048	449.7274	329.3591	479.9571	441.7682	363.7047	620.6084	493.6276	397.2561	464.1682
	60	650	15	240	141.662131203788	358.2648	214.1535	311.8217	385.9784	189.5021	281.359	186.3456	168.2706	292.6447	349.5481
	70	650	15	240	141.662131203788	246.7247	13.01088	-41.2527	291.9997	21.49192	137.6884	30.33652	29.23425	8.953479	234.928

## Sheet: sheet 6
	Table S4. Experimental and predicted H2S emission, µg H2S·g-1d.m, in different machine learning models
	Temperature	Biochar type	Biochar_dose	Time	Experimental data	Linear Regression	Random Forest	Generalized Boosted Regression Models	SVM with Linear Kernel	SVM with Radial Basis Function Kernel	k-Nearest Neighbors	Bayesian Regularized Neural Network	Recursive Partitioning and Regression Trees	Extreme Gradient Boosting Tree	Partial Least Squares Regression
	50	550	0	24	65.4549134676011	8.126528	48.24432	38.44164	20.02076	56.14465	72.93995	47.01978	42.00907	74.95229	6.377511
	60	550	0	24	50.3111523422767	25.95829	70.52171	76.80363	27.02513	68.764	74.41424	71.00207	52.62103	84.12012	24.91081
	70	550	0	24	5.42003779395725	43.79004	16.324	20.78303	34.0295	9.280786	72.75168	6.697729	15.78684	-0.81615	43.44411
	50	600	0	24	1.48119323320702	29.27027	12.31694	26.31072	20.96665	9.261193	66.62694	4.905779	11.14164	57.27314	24.65734
	60	600	0	24	39.2295499198886	47.10203	103.8216	102.7907	27.97102	113.4689	82.07674	138.2744	128.1468	127.3665	43.19064
	70	600	0	24	65.4537000934616	64.93379	18.98933	15.72477	34.97539	11.24764	67.20819	28.86675	15.78684	7.862643	61.72394
	50	650	0	24	76.1915335986534	50.41402	16.09991	16.44749	21.91253	4.401294	79.08098	24.94043	11.14164	-10.1634	42.93716
	60	650	0	24	83.2656209276674	68.24578	61.24349	70.92312	28.9169	83.68955	85.40561	67.72016	37.49794	57.75875	61.47046
	70	650	0	24	83.2656209276674	86.07754	30.35495	19.10022	35.92127	14.75025	83.44932	33.04234	15.78684	-17.3523	80.00377
	50	550	3	24	83.2656209276674	13.52837	35.36846	20.03661	23.13033	16.23949	68.51686	15.26197	42.00907	39.34939	12.30484
	60	550	3	24	83.2656209276674	31.36013	65.12473	62.21005	30.1347	67.73901	78.49478	66.22494	52.62103	63.761	30.83814
	70	550	3	24	83.2656209276674	49.19188	15.31676	9.493627	37.13907	2.056922	66.47704	6.90025	15.78684	-28.3985	49.37144
	50	600	3	24	0	34.67211	11.74806	10.02627	24.07622	-4.91436	63.25897	7.797684	11.14164	1.503016	30.58466
	60	600	3	24	63.9349843307091	52.50387	89.05332	78.12189	31.08059	90.13959	84.43339	64.59482	128.1468	86.84023	49.11796
	70	600	3	24	152.032445061591	70.33563	17.74778	-1.21983	38.08496	-0.40521	57.67013	9.333944	15.78684	-39.8869	67.65126
	50	650	3	24	164.81265609241	55.81586	14.57947	16.26087	25.0221	9.961758	72.48455	13.88813	11.14164	2.858725	48.86449
	60	650	3	24	167.173408225898	73.64762	59.61903	75.45947	32.02647	89.31006	88.05188	115.4105	37.49794	86.02474	67.39779
	70	650	3	24	168.664727419211	91.47938	19.98114	6.428608	39.03084	14.40044	78.94239	17.86685	15.78684	6904-03-01	85.93109
	50	550	6	24	169.535146434919	18.93021	39.26257	25.48664	26.2399	35.72397	61.57381	40.2902	64.97853	56.1354	18.23216
	60	550	6	24	170.281730798158	36.76197	61.06765	68.29498	33.24427	63.6398	82.52432	106.7198	52.62103	89.33456	36.76546
	70	550	6	24	170.902630975763	54.59372	16.1746	15.42735	40.24864	17.70244	62.14979	9.695511	15.78684	11.02365	55.29876
	50	600	6	24	171.400682576435	40.07396	11.266	13.93997	27.18578	2.443007	54.90532	8.970452	11.14164	15.58718	36.51199
	60	600	6	24	171.773049991471	57.90571	97.12252	89.52742	34.19015	101.3907	93.95706	128.5373	128.1468	109.7119	55.04529
	70	600	6	24	34.8440744235271	75.73747	18.8588	8.476985	41.19452	11.79127	59.55221	10.91705	15.78684	-3.16662	73.57859
	50	650	6	24	43.1888763756897	61.2177	18.44379	4.708561	28.13167	4.786115	61.48715	0.64894	11.14164	-27.8864	54.79181
	60	650	6	24	47.0337397603547	79.04946	57.36636	60.66378	35.13604	53.74448	89.81045	78.10377	37.49794	64.06717	73.32511
	70	650	6	24	49.8778852777781	96.88122	19.02348	2.827026	42.14041	16.38096	73.76511	-2.23544	15.78684	-4.4186	91.85842
	50	550	9	24	50.6152563378508	24.33205	59.06054	60.77311	29.34947	37.92286	63.737	87.08484	64.97853	88.98873	24.15948
	60	550	9	24	51.1057397662028	42.16381	66.92178	55.31098	36.35384	57.30402	86.13141	45.62647	52.62103	48.30831	42.69279
	70	550	9	24	51.5929313594652	59.99556	27.26795	18.76437	43.35821	20.04935	67.47004	20.48674	15.78684	20.09553	61.22609
	50	600	9	24	52.8109103426211	45.4758	14.45459	28.33937	30.29535	12.49961	58.43371	37.20179	11.14164	64.96517	42.43931
	60	600	9	24	52.8109103426211	63.30755	107.731	97.27664	37.29972	149.7476	87.24805	138.566	128.1468	85.21027	60.97261
	70	600	9	24	0	81.13931	22.19614	19.29262	44.30409	15.43361	68.57243	3.128309	15.78684	22.42992	79.50591
	50	650	9	24	1.48119323320702	66.61954	20.92523	14.1414	31.24124	1.675232	61.94263	21.25079	11.14164	8.834081	60.71914
	60	650	9	24	39.2295499198886	84.4513	37.77286	24.95632	38.2456	17.267	94.30611	-18.8445	37.49794	26.90798	79.25244
	70	650	9	24	65.4537000934616	102.2831	21.02409	-4.41776	45.24997	4.670829	88.7915	14.14323	15.78684	8.520401	97.78574
	50	550	12	24	76.1915335986534	29.73389	27.09989	24.88472	32.45903	10.45065	70.69517	44.9148	32.13808	-3.24501	30.08681
	60	550	12	24	83.2656209276674	47.56565	77.73999	70.45473	39.4634	65.05543	83.48756	80.95572	52.62103	42.94184	48.62011
	70	550	12	24	83.2656209276674	65.3974	14.72434	11.34699	46.46777	13.96957	73.66893	-7.39868	17.18798	4.976152	67.15341
	50	600	12	24	83.2656209276674	50.87764	11.15562	15.76733	33.40492	9.478839	65.83564	16.69243	11.14164	37.53629	48.36664
	60	600	12	24	83.2656209276674	68.70939	145.8971	149.8031	40.40929	190.9011	82.75998	201.1891	128.1468	144.6489	66.89994
	70	600	12	24	83.2656209276674	86.54115	20.89316	24.0063	47.41366	16.14028	77.21189	29.91436	17.18798	72.11532	85.43324
	50	650	12	24	0	72.02138	11.95245	-1.51241	34.3508	10.43525	67.19151	-6.94211	11.14164	-53.4214	66.64646
	60	650	12	24	63.4711209335681	89.85314	42.1925	51.37661	41.35517	12.99044	94.5232	12.50537	37.49794	51.51986	85.17976
	70	650	12	24	193.652508965841	107.6849	29.11735	1.954049	48.35954	4273-12-01	102.9122	14.4101	59.59816	23.37928	103.7131
	50	550	15	24	237.736414981211	35.13573	30.47251	29.82677	35.5686	17.0682	75.33778	14.78221	32.13808	-1.24616	36.01413
	60	550	15	24	242.681070998005	52.96749	68.72034	66.66514	42.57297	64.93321	78.352	92.12334	52.62103	-9.17077	54.54744
	70	550	15	24	245.153977402655	70.79924	20.739	9.495695	49.57734	14.38645	79.22424	8504-11-01	17.18798	40.02565	73.08074
	50	600	15	24	246.266677347286	56.27948	14.69734	14.33881	36.51448	11.52391	69.43172	23.10659	11.14164	-26.5944	54.29396
	60	600	15	24	247.256037648054	74.11123	102.4111	86.4643	43.51885	142.8732	81.01743	89.38803	128.1468	26.40668	72.82726
	70	600	15	24	248.122058304958	91.94299	27.83271	-6.05909	50.52322	18.30723	94.89048	-8.29103	17.18798	41.0354	91.36056
	50	650	15	24	248.988078961862	77.42322	30.61607	4.860923	37.46037	60.70797	73.68292	39.58725	11.14164	39.01898	72.57379
	60	650	15	24	249.854099618765	95.25498	49.47759	32.89094	44.46474	27.52124	100.2783	19.99277	37.49794	89.84876	91.10709
	70	650	15	24	10.0034995626099	113.0867	82.76351	78.22998	51.46911	62.18181	117.8871	73.98313	414.9649	148.8703	109.6404
	50	550	0	48	17.2721941694002	16.57316	60.3372	59.29422	28.4164	70.03253	72.86506	64.31885	42.00907	101.6812	15.19415
	60	550	0	48	23.0704712237118	34.40492	118.0729	122.0774	35.42077	105.1083	77.26598	98.3689	126.5656	140.1133	33.72745
	70	550	0	48	26.7925039774841	52.23668	38.81072	35.52181	42.42514	32.81462	77.08611	28.70084	32.30865	24.07587	52.26075
	50	600	0	48	29.9761603296399	37.71691	45.03218	49.74171	29.36229	36.44348	63.90143	28.79864	34.92306	75.6867	33.47398
	60	600	0	48	33.9042232325502	55.54867	144.9977	142.077	36.36666	160.7291	97.86477	160.613	128.6696	175.0444	52.00728
	70	600	0	48	40.4714342363231	73.38043	32.53441	28.56777	43.37103	35.79237	68.32557	30.61027	32.30865	24.43935	70.54058
	50	650	0	48	45.7129393399881	58.86066	50.44869	41.20253	30.30817	31.07757	83.07863	50.79479	34.92306	26.88392	51.7538
	60	650	0	48	49.0903621419285	76.69241	133.6986	137.4482	37.31254	169.3663	89.5549	114.7839	187.0585	124.0704	70.2871
	70	650	0	48	0	94.52417	38.09816	35.0055	44.31691	30.27581	88.37027	36.86152	32.30865	17.85816	88.82041
	50	550	3	48	20.4798568348652	21.975	36.09326	39.72286	31.52597	25.99926	66.42101	22.59909	42.00907	65.5358	21.12148
	60	550	3	48	26.2725111048481	39.80676	118.3557	107.003	38.53034	113.4433	82.01618	94.05985	126.5656	119.2118	39.65478
	70	550	3	48	42.5895362483033	57.63852	26.77095	23.75156	45.53471	23.68002	64.71953	26.26559	32.30865	-4.04892	58.18808
	50	600	3	48	42.8363799888896	43.11875	35.71728	30.29979	32.47185	26.75353	59.29944	26.01029	34.92306	19.37416	39.4013
	60	600	3	48	42.8363799888896	60.95051	118.3246	112.8219	39.47622	127.0579	95.20369	80.27123	128.6696	133.9758	57.9346
	70	600	3	48	42.8363799888896	78.78227	24.27298	11.14232	46.48059	14.63717	58.86767	11.99178	32.30865	-23.8526	76.4679
	50	650	3	48	42.8363799888896	64.2625	44.13205	44.20209	33.41774	50.55681	71.23542	43.91361	34.92306	39.36362	57.68113
	60	650	3	48	42.8363799888896	82.09426	152.5829	150.9182	40.42211	173.8902	96.14121	165.2491	187.0585	151.794	76.21443
	70	650	3	48	42.8363799888896	99.92601	32.08053	20.35547	47.42648	21.29641	78.82665	23.45016	32.30865	38.35845	94.74773
	50	550	6	48	0	27.37685	43.35868	44.67874	34.63554	46.27321	61.88604	43.92905	64.97853	72.31942	27.0488
	60	550	6	48	42.1046996314274	45.2086	122.1878	112.5155	41.63991	101.334	87.70265	124.8856	148.5916	134.7829	45.5821
	70	550	6	48	104.280204360024	63.04036	27.36581	29.68081	48.64428	31.21352	59.56527	30.25156	32.30865	25.37085	64.1154
	50	600	6	48	177.610707075601	48.52059	36.79285	34.64441	35.58142	32.00924	56.97793	16.50508	34.92306	23.45592	45.32863
	60	600	6	48	198.070095111496	66.35235	129.6853	124.7405	42.58579	124.6205	100.6799	137.3053	138.549	146.845	63.86193
	70	600	6	48	209.122445047038	84.18411	26.2283	20.995	49.59016	21.23763	62.30463	19.27208	32.30865	2.865254	82.39523
	50	650	6	48	210.975291279407	69.66434	36.10915	28.03366	36.52731	38.086	61.8373	26.50311	34.92306	-1.38387	63.60845
	60	650	6	48	212.331360316732	87.4961	124.1552	128.5403	43.53168	117.8993	100.9613	126.5456	79.30912	119.834	82.14175
	70	650	6	48	213.443622049669	105.3279	28.98503	15.14438	50.53605	15.88844	74.55596	14.22731	32.30865	20.24708	100.6751
	50	550	9	48	214.435745686927	32.77869	78.62714	83.92257	37.7451	47.89996	57.71466	94.3988	64.97853	99.22802	32.97612
	60	550	9	48	215.553638893099	50.61044	88.78325	86.40651	44.74947	80.73124	94.91205	54.5142	73.39092	87.81195	51.50943
	70	550	9	48	11.7424727065463	68.4422	32.53115	31.5133	51.75384	24.60581	63.25682	38.3547	32.30865	28.49794	70.04273
	50	600	9	48	21.7578675636888	53.92243	48.8216	53.49757	38.69099	36.85287	64.26115	39.60112	34.92306	66.88911	51.25595
	60	600	9	48	28.8359875747948	71.75419	127.8846	128.2644	45.69536	165.7969	94.14239	148.8877	138.549	116.3986	69.78925
	70	600	9	48	46.9293024258876	89.58595	31.84823	32.48908	52.69973	21.93537	74.65161	19.97242	32.30865	22.51702	88.32255
	50	650	9	48	54.356979680374	75.06618	46.61315	36.74747	39.63687	20.85252	54.77941	45.09205	34.92306	29.39186	69.53578
	60	650	9	48	60.3019378219431	92.89794	82.66369	73.00999	46.64124	63.49187	109.4559	41.04923	79.30912	76.73011	88.06908
	70	650	9	48	70.5807431136709	110.7297	31.49065	9.397442	53.64561	10.61289	89.75207	38.96007	32.30865	27.2413	106.6024
	50	550	12	48	76.3956527073472	38.18053	40.08239	45.68806	40.85467	22.18881	68.07228	52.48706	32.13808	19.13989	38.90345
	60	550	12	48	82.2080772969237	56.01228	106.2456	105.1716	47.85904	87.9191	90.26059	87.08999	114.2747	94.59103	57.43675
	70	550	12	48	0	73.84404	21.97265	20.39146	54.86341	18.60516	71.66016	16.29045	17.18798	25.52418	75.97005
	50	600	12	48	19.3748912590883	59.32427	36.74848	40.97278	41.80056	25.38786	68.96234	18.32597	34.92306	51.60584	57.18328
	60	600	12	48	43.6435510115427	77.15603	181.9394	191.5406	48.80492	205.8202	92.31989	216.4897	186.991	187.9827	75.71658
	70	600	12	48	65.1607791164045	94.98779	34.7759	41.53568	55.80929	19.77521	88.45323	61.35679	17.18798	84.34801	94.24988
	50	650	12	48	68.3501419942402	80.46802	31.86447	19.59249	42.74644	16.51424	64.67538	14.99635	34.92306	-20.7181	75.4631
	60	650	12	48	70.5570231186869	98.29978	99.48334	107.1841	49.75081	56.69794	110.3158	75.07407	79.30912	113.4875	93.9964
	70	650	12	48	70.924836639428	116.1315	45.28858	32.04992	56.75518	48.72888	104.4046	57.81444	59.59816	54.24574	112.5297
	50	550	15	48	73.1317177638747	43.58237	49.95621	51.53507	43.96424	40.88232	75.93851	31.12587	32.13808	20.39766	44.83077
	60	550	15	48	73.1317177638747	61.41412	105.7819	103.0593	50.96861	100.6217	83.95938	97.44273	114.2747	41.73741	63.36408
	70	550	15	48	73.1317177638747	79.24588	32.236	21.81597	57.97298	25.17517	82.78372	28.00498	17.18798	59.83255	81.89738
	50	600	15	48	0	64.72611	35.95476	36.92819	44.91012	17.31965	70.60129	29.02689	34.92306	-13.2659	63.1106
	60	600	15	48	15.2315860056184	82.55787	137.9148	123.5555	51.91449	148.7265	92.25512	104.2404	186.991	68.99944	81.6439
	70	600	15	48	33.4624166431949	100.3896	44.07601	5.60248	58.91886	12.12371	94.78923	20.90907	17.18798	52.527	100.1772
	50	650	15	48	74.5988814080999	85.86986	55.90726	28.69602	45.85601	59.38329	74.9889	58.83546	34.92306	70.98123	81.39043
	60	650	15	48	113.72672017043	103.7016	110.3027	92.9844	52.86038	78.75711	106.5445	89.45858	79.30912	151.0754	99.92373
	70	650	15	48	150.131216530447	121.5334	123.7946	156.852	59.86475	145.099	122.7834	174.0809	414.9649	178.9958	118.457
	50	550	0	72	157.024655618336	25.0198	67.59439	68.07931	36.81204	78.04633	75.40694	76.55298	82.74274	96.08315	24.01079
	60	550	0	72	160.743429864646	42.85156	124.2714	133.2673	43.81641	121.8888	84.0421	117.9433	126.5656	140.8236	42.54409
	70	550	0	72	163.864500885804	60.68332	50.83111	48.92957	50.82078	43.81789	76.66309	47.85773	50.27485	29.36111	61.07739
	50	600	0	72	166.978956400727	46.16355	56.19589	56.35799	37.75792	48.75167	64.60933	46.05761	59.13191	73.78287	42.29062
	60	600	0	72	170.677007337811	63.9953	163.7279	163.227	44.76229	179.4575	102.7386	176.0171	128.6696	179.449	60.82392
	70	600	0	72	10.241940917182	81.82706	43.85032	41.74795	51.76666	49.76326	67.55545	37.44264	50.27485	33.41879	79.35722
	50	650	0	72	41.4900470934377	67.30729	47.48292	59.53755	38.70381	40.00167	86.98057	63.89137	60.37304	47.53829	60.57044
	60	650	0	72	68.0968686515273	85.13905	188.2912	192.2595	45.70818	212.7083	99.38792	152.6872	187.0585	151.0331	79.10374
	70	650	0	72	92.1811723924015	102.9708	61.28111	53.34368	52.71255	36.18589	86.21075	40.98057	50.27485	49.39585	97.63705
	50	550	3	72	101.341505082525	30.42164	43.09668	48.07747	39.92161	29.32563	68.81162	27.08923	26.69765	63.70243	29.93812
	60	550	3	72	105.982789700691	48.2534	128.1883	117.7623	46.92598	136.5132	84.56224	113.7347	126.5656	123.6868	48.47142
	70	550	3	72	109.53505781627	66.08516	40.87685	37.17233	53.93035	36.02305	69.14205	42.57275	36.8574	5.000991	67.00472
	50	600	3	72	113.420698330601	51.56539	47.10621	36.48558	40.86749	42.07607	55.71786	38.92296	43.21872	21.23496	48.21794
	60	600	3	72	117.1248360945	69.39715	125.4651	133.5414	47.87186	137.68	107.6944	90.8463	128.6696	142.145	66.75124
	70	600	3	72	0	87.2289	34.40117	24.33553	54.87623	23.32261	58.30284	18.02612	36.8574	-11.1086	85.28454
	50	650	3	72	19.3748912590883	72.70913	53.79175	65.20017	41.81338	72.668	77.71635	63.01506	79.71048	63.78268	66.49777
	60	650	3	72	43.6435510115427	90.54089	209.6171	213.9015	48.81775	223.4131	99.9006	204.2666	187.0585	182.5215	85.03107
	70	650	3	72	65.1607791164045	108.3726	50.37387	41.80455	55.82212	27.76448	81.53513	29.97564	36.8574	73.66084	103.5644
	50	550	6	72	68.3501419942402	35.82348	49.69354	52.87431	43.03117	50.50546	63.91674	45.75835	49.65239	71.62682	35.86544
	60	550	6	72	70.5570231186869	53.65524	134.3852	121.1319	50.03554	120.5228	91.73827	137.4328	148.5916	140.3987	54.39874
	70	550	6	72	70.924836639428	71.487	43.78682	43.88484	57.03991	42.89118	64.18486	48.25561	36.8574	35.56153	72.93204
	50	600	6	72	73.1317177638747	56.96723	40.56418	40.67117	43.97706	46.42767	57.36579	22.05818	43.21872	26.45748	54.14527
	60	600	6	72	73.1317177638747	74.79899	135.1512	143.317	50.98143	131.2201	114.9201	141.3664	138.549	156.1551	72.67857
	70	600	6	72	73.1317177638747	92.63074	37.60288	34.97144	57.9858	34.83697	62.26204	29.33697	36.8574	16.75011	91.21187
	50	650	6	72	0	78.11097	45.30327	42.82721	44.92294	56.13864	65.61487	41.17139	42.80112	24.17592	72.42509
	60	650	6	72	8.33378644256808	95.94273	179.2107	180.6081	51.92731	161.9058	108.1502	163.2375	127.0684	151.7023	90.95839
	70	650	6	72	93.4631456532817	113.7745	50.92356	34.74854	58.93168	25.87941	79.45833	31.22726	36.8574	56.69018	109.4917
	50	550	9	72	117.101907706143	41.22532	99.32718	99.95735	46.14074	51.80725	60.21545	100.8003	115.0211	98.20461	41.79276
	60	550	9	72	144.908659335477	59.05708	84.48259	88.12346	53.14511	90.98272	102.5071	61.4763	73.39092	93.09687	60.32607
	70	550	9	72	182.877842250981	76.88884	53.59996	43.92927	60.14948	34.32973	65.46381	52.62864	64.56328	38.35781	78.85937
	50	600	9	72	185.611236361309	62.36907	52.76081	55.09388	47.08663	49.19534	61.96245	42.5723	55.21451	69.55991	60.07259
	60	600	9	72	187.475006576886	80.20083	107.8311	135.8492	54.091	174.3517	106.5307	152.852	138.549	125.3777	78.60589
	70	600	9	72	189.960565606304	98.03258	43.62132	41.60164	61.09537	43.11659	79.32744	37.44125	64.56328	36.07105	97.13919
	50	650	9	72	191.824335821882	83.51282	59.53045	55.46031	48.03251	30.58085	59.21631	57.65316	70.62685	54.62085	78.35242
	60	650	9	72	193.689206593242	101.3446	124.0614	118.5804	55.03688	103.8496	117.9123	88.47221	127.0684	108.2675	96.88572
	70	650	9	72	19.98429191768	119.1763	63.5027	40.90934	62.04125	35.5944	95.08679	62.98856	64.56328	63.35357	115.419
	50	550	12	72	49.5179779746475	46.62716	56.02	56.13333	49.25031	26.92936	65.84432	59.17438	59.19145	20.94243	47.72009
	60	550	12	72	109.292216810158	64.45892	112.2186	115.0797	56.25468	98.51232	94.32409	93.08192	114.2747	102.7019	66.25339
	70	550	12	72	150.874063186234	82.29068	33.32391	32.23611	63.25905	30.58944	72.22457	35.16828	33.34379	38.21001	84.78669
	50	600	12	72	162.875698902743	67.77091	35.71342	43.21623	50.19619	33.62074	70.14071	21.65768	29.77982	57.10257	65.99992
	60	600	12	72	189.189531330726	85.60267	197.2384	211.5408	57.20056	217.04	105.6147	225.8253	186.991	199.7879	84.53322
	70	600	12	72	199.424066079998	103.4344	51.8393	64.30053	64.20493	42.89385	100.3019	92.28112	71.79206	100.728	103.0665
	50	650	12	72	205.238631908883	88.91466	30.3576	30.79742	51.14208	19.68543	62.22031	26.54534	29.77982	7.33689	84.27974
	60	650	12	72	210.19394099711	106.7464	148.3668	151.1659	58.14645	103.6871	121.1097	122.8581	127.0684	147.8509	102.813
	70	650	12	72	0	124.5782	110.5483	86.54238	65.15082	109.4651	117.2109	99.96327	59.59816	93.1841	121.3463
	50	550	15	72	35.3458456189471	52.029	60.33642	63.78929	52.35988	54.64805	74.7613	45.19622	59.19145	36.30049	53.64741
	60	550	15	72	52.8862714206059	69.86076	112.2373	110.4399	59.36425	120.7995	88.54902	102.8955	114.2747	63.94854	72.18072
	70	550	15	72	68.1651729518936	87.69252	46.04706	33.1969	66.36861	39.93949	78.52153	39.77088	33.34379	86.61868	90.71402
	50	600	15	72	69.9838305112129	73.17275	40.66133	39.65757	53.30576	19.90618	77.76033	36.14935	43.77811	6.331137	71.92724
	60	600	15	72	70.7098415129372	91.00451	137.7356	136.6391	60.31013	151.7298	105.2884	114.1719	186.991	94.90479	90.46054
	70	600	15	72	70.7098415129372	108.8363	54.54958	17.23361	67.3145	24.07669	110.581	45.8331	71.79206	83.00732	108.9938
	50	650	15	72	70.7098415129372	94.3165	59.5545	52.46456	54.25164	60.46567	73.69631	68.14009	70.2426	113.1365	90.20707
	60	650	15	72	70.7098415129372	112.1483	164.642	152.9308	61.25601	139.2314	121.0254	142.1332	127.0684	199.5391	108.7404
	70	650	15	72	70.7098415129372	129.98	267.7683	280.8183	68.26038	257.1695	131.138	271.8656	414.9649	232.0344	127.2737
	50	550	0	96	0	33.46644	72.43602	68.81891	45.20768	82.10438	74.97545	84.22264	82.74274	88.60709	32.82743
	60	550	0	96	31.9114331343538	51.29819	124.95	133.9927	52.21205	126.3126	95.40626	129.869	126.5656	138.7359	51.36073
	70	550	0	96	86.0307046182341	69.12995	53.43392	60.10224	59.21642	48.61133	78.57678	62.14275	50.27485	37.76351	69.89403
	50	600	0	96	138.962033530065	54.61018	55.12536	57.22967	46.15356	51.87321	65.99054	57.71093	59.13191	66.78561	51.10726
	60	600	0	96	176.239418595174	72.44194	166.6731	163.471	53.15793	180.2919	109.5013	185.053	190.462	177.8402	69.64056
	70	600	0	96	205.407085387536	90.2737	51.96306	51.83402	60.1623	56.18092	65.54787	47.32578	50.27485	42.29998	88.17386
	50	650	0	96	208.708835364341	75.75393	54.62037	60.6347	47.09945	39.43093	90.19917	67.11337	60.37304	53.57061	69.38708
	60	650	0	96	211.522645657051	93.58569	178.1277	193.3204	54.10382	222.8135	114.7931	178.7523	169.9616	162.4538	87.92038
	70	650	0	96	213.596677443811	111.4174	69.51988	58.41323	61.10819	34.84631	91.15992	45.48254	50.27485	71.3066	106.4537
	50	550	3	96	215.305770295559	38.86828	41.87263	44.11346	48.31724	29.44729	74.1774	29.33188	26.69765	58.71293	38.75476
	60	550	3	96	216.905826346393	56.70004	126.2409	117.4285	55.32161	142.8763	91.6536	125.8591	126.5656	124.0856	57.28806
	70	550	3	96	42.5805452511296	74.53179	47.79032	47.20459	62.32598	44.32564	74.39179	55.0071	36.8574	15.88989	75.82136
	50	600	3	96	127.556502947949	60.01202	45.9271	34.09285	49.26313	46.96259	59.77367	47.94965	43.21872	16.72425	57.03458
	60	600	3	96	287.140981236965	77.84378	114.5341	130.3805	56.2675	132.064	117.416	97.85765	102.2863	143.0226	75.56788
	70	600	3	96	413.031288935958	95.67554	41.3568	31.22729	63.27187	26.68329	64.59221	25.46021	36.8574	0.259163	94.10118
	50	650	3	96	447.465990747741	81.15577	74.71533	71.60358	50.20901	81.42892	85.73266	73.94751	79.71048	72.30151	75.31441
	60	650	3	96	515.965128760427	98.98753	215.4338	218.0565	57.21338	242.8416	111.2923	230.4424	246.9031	196.4286	93.84771
	70	650	3	96	605.19914098236	116.8193	56.49599	48.3644	64.21775	32.78292	84.21814	36.69718	36.8574	98.0581	112.381
	50	550	6	96	636.301452296229	44.27012	48.67687	50.68523	51.42681	52.23978	70.03511	46.33416	49.65239	68.3111	44.68208
	60	550	6	96	659.443052976192	62.10188	138.0698	121.634	58.43118	126.2609	96.65563	145.4021	148.5916	142.4714	63.21538
	70	550	6	96	0	79.93363	53.61112	54.07561	65.43555	54.68768	67.87208	63.58268	36.8574	48.12429	81.74868
	50	600	6	96	1.84776311743195	65.41386	35.47308	39.16279	52.3727	51.32922	61.68227	26.77403	43.21872	23.62062	62.96191
	60	600	6	96	40.2753444326113	83.24562	138.2957	141.8418	59.37707	128.5389	124.946	142.626	145.5155	158.7066	81.49521
	70	600	6	96	55.1041688091343	101.0774	50.03523	42.87152	66.38144	48.33075	67.861	39.59173	36.8574	29.79168	100.0285
	50	650	6	96	57.3209216652687	86.55761	48.89975	48.20196	53.31858	62.02451	77.36308	47.81969	42.80112	34.36863	81.24173
	60	650	6	96	58.7977812357328	104.3894	195.5853	188.3789	60.32295	185.0143	120.5092	187.2003	210.5617	167.2833	99.77503
	70	650	6	96	59.6600456734329	122.2211	66.62082	46.37667	67.32732	38.78817	88.29365	47.17861	36.8574	82.76126	118.3083
	50	550	9	96	60.3984754586649	49.67196	98.29684	107.3162	54.53638	53.27755	67.15262	106.3178	115.0211	97.17328	50.6094
	60	550	9	96	61.0134833736039	67.50372	86.24445	90.30423	61.54075	92.131	104.2219	67.31151	73.39092	97.45395	69.14271
	70	550	9	96	61.6284912885427	85.33547	64.88708	57.04786	68.54512	46.56052	71.56598	63.32971	64.56328	53.20493	87.67601
	50	600	9	96	0	70.81571	52.57717	56.1995	55.48226	53.77098	68.36575	46.56915	55.21451	69.00739	68.88923
	60	600	9	96	123.980175308975	88.64746	135.5702	136.9443	62.48663	178.6351	118.7248	152.8147	145.5155	130.2138	87.42253
	70	600	9	96	170.326990857828	106.4792	72.01173	63.9081	69.491	68.76776	83.85882	54.54094	64.56328	51.39698	105.9558
	50	650	9	96	186.476461235125	91.95945	64.64732	59.71552	56.42815	32.0726	67.46369	62.66292	70.62685	67.09783	87.16906
	60	650	9	96	188.633913179173	109.7912	144.5917	136.2545	63.43252	131.1224	127.9863	123.0681	140.2942	126.1329	105.7024
	70	650	9	96	189.535760674663	127.623	90.95199	80.64398	70.43689	63.97892	110.5457	83.87964	64.56328	91.70904	124.2357
	50	550	12	96	190.078032846144	55.0738	58.35545	57.31038	57.64595	27.266	66.93541	64.36521	59.19145	23.24248	56.53673
	60	550	12	96	190.79718349416	72.90556	110.2889	113.6192	64.65032	99.23589	100.85	99.11854	114.2747	110.3904	75.07003
	70	550	12	96	191.156758818169	90.73731	50.33653	45.79208	71.65469	43.4835	75.97773	49.6847	33.34379	56.38848	93.60333
	50	600	12	96	191.516334142177	76.21755	37.65712	42.78275	58.59183	36.70983	70.37289	26.2422	29.77982	59.88144	74.81656
	60	600	12	96	191.516334142177	94.0493	210.2834	214.1427	65.5962	224.7891	118.4594	231.4838	233.5793	207.9551	93.34986
	70	600	12	96	12.0258118995011	111.8811	108.7179	110.1979	72.60057	72.9698	110.7646	121.7405	71.79206	119.3853	111.8832
	50	650	12	96	27.9015285821056	97.36129	30.17659	32.91047	59.53772	19.58018	66.59679	31.0455	29.77982	23.1453	93.09638
	60	650	12	96	41.057757477334	115.193	171.913	172.1796	66.54209	141.8125	135.6975	155.5483	182.3353	169.0476	111.6297
	70	650	12	96	48.9980927018076	133.0248	154.4823	158.5022	73.54646	172.469	124.5616	137.8171	186.2993	124.8709	130.163
	50	550	15	96	56.2043284798399	60.47564	65.17313	64.10394	60.75551	59.2731	71.81754	56.118	59.19145	45.17538	62.46405
	60	550	15	96	63.4145759965168	78.3074	113.5206	110.0366	67.75988	126.6062	96.66181	108.4488	114.2747	78.21187	80.99736
	70	550	15	96	69.634963546749	96.13915	60.0078	41.76304	74.76425	51.99414	84.70018	47.8242	33.34379	111.372	99.53066
	50	600	15	96	74.2734104804947	81.61939	43.33771	41.40567	61.7014	20.81679	72.86323	43.56442	43.77811	15.68484	80.74388
	60	600	15	96	79.5217066556888	99.45114	142.0412	141.1888	68.70577	152.8761	118.0708	121.1253	131.4692	109.6469	99.27718
	70	600	15	96	0	117.2829	74.63851	44.03159	75.71014	45.75058	126.0779	65.5418	71.79206	108.2395	117.8105
	50	650	15	96	11.5709595529199	102.7631	65.98658	72.16843	62.64728	62.52289	74.09206	70.59377	70.2426	135.5199	99.02371
	60	650	15	96	31.0045227267504	120.5949	207.6954	211.4469	69.65165	195.4463	139.0134	178.229	206.8123	227.3107	117.557
	70	650	15	96	42.8532451730054	138.4266	372.3603	418.0023	76.65602	373.9495	142.6883	362.7244	414.9649	270.296	136.0903
	50	550	0	120	45.5378300648199	41.91307	75.21834	73.28157	53.60332	84.11443	78.47104	87.89787	82.74274	82.48675	41.64407
	60	550	0	120	47.0019204090428	59.74483	126.8361	137.2133	60.60769	126.194	102.0841	134.9089	126.5656	138.8014	60.17737
	70	550	0	120	48.0997891510362	77.57659	65.23366	68.60611	67.61205	53.91356	85.11176	71.30558	66.50769	44.0476	78.71067
	50	600	0	120	49.0766560594089	63.05682	58.752	62.46447	54.5492	52.0678	70.25639	64.43108	59.13191	61.16579	59.9239
	60	600	0	120	49.9325211341609	80.88858	170.3664	162.4071	61.55357	175.9091	120.3544	188.7009	190.462	178.4062	78.4572
	70	600	0	120	50.4221646066834	98.72034	56.09873	54.87057	68.55794	59.6345	68.98906	57.5296	68.6098	49.08461	96.9905
	50	650	0	120	0	84.20057	61.83799	58.92633	55.49509	38.23993	97.22993	64.04987	60.37304	50.75006	78.20372
	60	650	0	120	70.0668052914178	102.0323	172.1513	177.4291	62.49945	216.8008	124.2853	192.4139	169.9616	165.8191	96.73702
	70	650	0	120	93.9572922964496	119.8641	58.67013	52.127	69.50382	30.9153	100.3258	49.9836	51.78715	80.8905	115.2703
	50	550	3	120	97.0725369409017	47.31491	42.12677	47.9466	56.71288	29.15092	75.93	29.97222	26.69765	55.27588	47.5714
	60	550	3	120	99.4428309210419	65.14667	128.1255	121.165	63.71725	140.4526	98.34764	131.6063	126.5656	126.8344	66.1047
	70	550	3	120	100.937908376565	82.97843	58.36234	56.22429	70.72162	54.39507	80.38444	64.34631	66.50769	24.85732	84.638
	50	600	3	120	102.180218301829	68.45866	50.9952	37.48119	57.65877	47.98743	63.07149	54.01059	43.21872	13.78774	65.85122
	60	600	3	120	102.800079232735	86.29042	119.9425	133.5844	64.66314	122.146	122.1097	102.8304	102.2863	146.2719	84.38452
	70	600	3	120	103.173848596616	104.1222	44.71277	36.41737	71.66751	27.52846	70.68601	32.25357	40.14327	9.727122	102.9178
	50	650	3	120	103.547617960497	89.60241	74.78754	70.59593	58.60465	83.96378	88.70102	79.81284	79.71048	72.16432	84.13105
	60	650	3	120	103.921387324378	107.4342	214.7503	222.0128	65.60902	245.0501	121.6701	244.221	246.9031	202.4772	102.6643
	70	650	3	120	11.0129001289937	125.2659	54.43469	52.60046	72.61339	37.60992	94.48864	42.44377	40.14327	110.3253	121.1977
	50	550	6	120	17.1698168071976	52.71675	51.9898	55.92977	59.82245	54.44506	71.20169	46.21876	49.65239	66.6285	53.49872
	60	550	6	120	25.9461125029063	70.54851	139.335	129.8234	66.82682	125.5259	102.0423	149.9628	148.5916	146.9744	72.03202
	70	550	6	120	33.0562129496578	88.38027	67.22397	67.68668	73.83119	68.92703	74.92563	77.24586	66.50769	58.84602	90.56532
	50	600	6	120	35.6730901724946	73.8605	47.72806	43.96253	60.76833	52.97059	65.49954	31.16535	43.21872	22.43845	71.77855
	60	600	6	120	38.0998310005555	91.69226	141.8701	149.4987	67.7727	124.4718	130.5578	142.7067	145.5155	163.7102	90.31185
	70	600	6	120	40.9043428235	109.524	56.04076	54.59871	74.77707	58.5416	77.22926	48.9079	66.81969	41.01395	108.8451
	50	650	6	120	43.333585446229	95.00425	52.67867	52.38338	61.71422	61.59874	82.12582	49.88765	42.80112	35.98568	90.05837
	60	650	6	120	44.2667548574317	112.836	201.1417	201.4883	68.71859	193.3247	131.1072	199.9619	210.5617	175.0862	108.5917
	70	650	6	120	0	130.6678	70.4475	61.51755	75.72296	49.7413	96.25269	60.25934	66.81969	96.78284	127.125
	50	550	9	120	4.28677996996459	58.1186	99.97564	109.5046	62.93202	55.29267	68.98058	110.8955	115.0211	97.8283	59.42604
	60	550	9	120	25.4980910874041	75.95035	87.61901	97.7201	69.93639	89.82454	110.266	72.5339	73.39092	104.2947	77.95935
	70	550	9	120	28.8071973238586	93.78211	68.56737	68.2945	76.94076	59.09338	80.02382	71.2886	66.50769	66.26437	96.49265
	50	600	9	120	30.6497284228685	79.26234	55.65778	56.84443	63.8779	55.42147	71.991	51.26643	55.21451	70.16293	77.70587
	60	600	9	120	40.3166880154975	97.0941	146.9515	150.7817	70.88227	181.4074	126.0925	150.7029	145.5155	137.5551	96.23917
	70	600	9	120	41.9205068434247	114.9259	73.379	87.15765	77.88664	88.99325	96.00775	70.80275	85.59596	64.95696	114.7725
	50	650	9	120	42.7837185108452	100.4061	67.95845	61.23803	64.82379	29.32583	74.00682	63.77985	70.62685	71.05265	95.9857
	60	650	9	120	43.5226799732726	118.2378	170.9098	147.1291	71.82816	144.0922	140.0834	146.673	140.2942	136.2735	114.519
	70	650	9	120	44.1373912307069	136.0696	100.103	100.7507	78.83253	83.85457	129.3063	99.38234	109.481	108.0683	133.0523
	50	550	12	120	0	63.52044	56.6184	60.77515	66.04158	26.38731	69.67154	67.46757	59.19145	30.73602	65.35337
	60	550	12	120	130.742598024319	81.35219	115.0342	120.5911	73.04595	94.7885	105.0225	104.9395	114.2747	124.0698	83.88667
	70	550	12	120	134.630591166689	99.18395	76.99842	64.49058	80.05032	52.1068	83.15149	60.80763	72.85126	76.28652	102.42
	50	600	12	120	137.639552372953	84.66418	39.08217	45.73278	66.98747	37.64691	73.09499	30.83907	29.77982	67.87547	83.6332
	60	600	12	120	139.64609381084	102.4959	215.2207	229.3474	73.99184	228.9413	127.721	234.9807	233.5793	222.135	102.1665
	70	600	12	120	141.025484680567	120.3277	130.3424	153.6045	80.99621	97.43987	125.7336	149.1773	212.8514	139.7839	120.6998
	50	650	12	120	142.279785816889	105.8079	25.94042	31.14069	67.93335	17.69726	74.48862	31.6458	29.77982	33.9387	101.913
	60	650	12	120	142.906085434482	123.6397	182.4916	182.2125	74.93772	164.3317	151.9677	174.8289	182.3353	186.0268	120.4463
	70	650	12	120	143.282205585265	141.4714	179.9146	198.0931	81.94209	219.9618	147.7772	168.9561	186.2993	148.0686	138.9796
	50	550	15	120	143.658325736049	68.92228	65.09503	63.255	69.15115	58.3652	72.83454	63.42009	59.19145	50.127	71.28069
	60	550	15	120	144.034445886832	86.75403	113.4533	107.491	76.15552	123.305	101.5425	113.8137	114.2747	89.34934	89.814
	70	550	15	120	15.73863708594	104.5858	69.88197	52.46221	83.15989	57.17786	92.17138	53.09582	72.85126	128.7281	108.3473
	50	600	15	120	25.3545146494508	90.06602	43.49396	34.33725	70.09704	21.67718	75.23416	49.77969	43.77811	21.13702	89.56052
	60	600	15	120	35.611770674609	107.8978	138.7235	132.3643	77.10141	153.3996	133.8574	126.3001	131.4692	121.2849	108.0938
	70	600	15	120	45.1149483449757	125.7295	81.03679	73.65841	84.10578	68.46184	140.1191	79.6821	82.28408	126.0961	126.6271
	50	650	15	120	53.4879955858133	111.2098	63.57674	53.00969	71.04292	64.33392	81.62096	69.39252	70.2426	143.7712	107.8403
	60	650	15	120	59.9904832894311	129.0415	200.8167	191.342	78.04729	237.9763	153.5484	200.0804	206.8123	241.7479	126.3736
	70	650	15	120	65.2429246095643	146.8733	385.3271	456.4277	85.05166	474.3055	157.2125	443.4222	414.9649	290.9518	144.9069
	50	550	0	155	69.8715851257836	54.23109	73.40275	71.85112	65.84695	85.37087	80.88949	87.58419	82.74274	78.84795	54.50167
	60	550	0	155	75.7605374703188	72.06284	125.6374	133.9716	72.85132	126.8289	103.1299	132.5582	126.5656	136.2363	73.03497
	70	550	0	155	0	89.8946	69.79801	78.38285	79.85569	68.18489	93.93133	78.04102	84.05325	53.83162	91.56827
	50	600	0	155	2.42097809234674	75.37483	58.61185	62.64699	66.79284	53.78436	73.12394	66.42472	59.13191	58.79693	72.7815
	60	600	0	155	49.9414437137266	93.20659	164.8379	159.969	73.79721	175.9692	123.5255	186.7246	190.462	177.1109	91.3148
	70	600	0	155	51.7629230598187	111.0383	63.87501	62.74087	80.80158	66.25276	80.4368	68.47422	68.6098	60.13845	109.8481
	50	650	0	155	53.70384333105	96.51858	72.51157	66.84852	67.73872	43.40538	104.7569	55.08283	60.37304	50.22585	91.06132
	60	650	0	155	55.2841152799963	114.3503	173.457	177.1384	74.74309	209.407	129.4542	193.6472	169.9616	166.3686	109.5946
	70	650	0	155	55.8907477983979	132.1821	66.63241	54.62441	81.74746	28.83367	110.8117	54.76581	51.78715	93.78902	128.1279
	50	550	3	155	56.2553663110556	59.63293	41.46247	44.56156	68.95652	29.76058	77.46756	29.52151	26.69765	52.80403	60.429
	60	550	3	155	56.6199848237133	77.46468	128.1817	117.6659	75.96089	133.1743	102.8148	131.914	126.5656	125.4362	78.9623
	70	550	3	155	56.9846033363709	95.29644	74.93725	66.08626	82.96526	76.86839	91.41127	76.21863	84.05325	35.80819	97.4956
	50	600	3	155	0	80.77667	49.39101	35.25785	69.90241	49.27607	68.1219	58.76824	43.21872	12.58573	78.70882
	60	600	3	155	134.293690337681	98.60843	113.9849	130.5996	76.90678	115.0764	132.1725	108.8263	102.2863	146.1435	97.24212
	70	600	3	155	137.869094198377	116.4402	50.81857	43.25455	83.91115	30.02835	76.72024	38.7055	40.14327	21.94785	115.7754
	50	650	3	155	144.056757637792	101.9204	76.84992	71.40369	70.84829	85.26017	99.93242	84.61071	79.71048	72.8069	96.98865
	60	650	3	155	145.842470381495	119.7522	220.0354	230.1305	77.85266	242.8665	137.1255	247.6523	246.9031	204.1935	115.5219
	70	650	3	155	147.515754295982	137.5839	60.22679	58.71312	84.85703	49.44365	104.0587	46.59183	40.14327	124.3907	134.0553
	50	550	6	155	148.590929569844	65.03477	52.80043	54.84336	72.06609	59.1955	74.54728	45.89991	49.65239	63.49956	66.35632
	60	550	6	155	149.071119226114	82.86652	137.4142	129.9601	79.07046	124.2503	105.6233	153.045	148.5916	144.9192	84.88962
	70	550	6	155	149.429510984068	100.6983	85.7016	80.69033	86.07483	95.29574	85.96395	97.34752	84.05325	69.13988	103.4229
	50	600	6	155	149.787902742022	86.17851	45.75753	43.69649	73.01197	55.87472	69.4466	37.16328	43.21872	20.57944	84.63615
	60	600	6	155	150.146294499976	104.0103	140.4909	148.4712	80.01634	124.5799	132.1626	142.9207	145.5155	162.9247	103.1694
	70	600	6	155	15.2695320649817	121.842	64.52193	62.89915	87.02071	65.7588	93.01483	60.47319	66.81969	52.57768	121.7027
	50	650	6	155	35.236060982335	107.3223	50.99482	53.22908	73.95786	59.7471	86.39273	50.39062	42.80112	35.97134	102.916
	60	650	6	155	42.3048572896641	125.154	204.6393	207.6413	80.96223	196.2113	141.0388	205.5316	210.5617	176.1455	121.4493
	70	650	6	155	53.7787744047527	142.9858	74.23677	69.17786	87.9666	62.8115	114.5771	71.45163	66.81969	110.1912	139.9826
	50	550	9	155	66.3478398721045	70.43661	100.4217	111.6085	75.17566	60.06054	69.79045	115.5901	115.0211	95.3116	72.28365
	60	550	9	155	76.1085181875161	88.26836	87.84822	99.54648	82.18003	90.18912	113.5006	79.56061	73.39092	102.8518	90.81695
	70	550	9	155	88.4286305579928	106.1001	78.20176	81.94464	89.18439	75.87032	95.75886	80.29991	84.05325	77.17045	109.3502
	50	600	9	155	95.472899466615	91.58035	55.93151	59.96206	76.12154	57.66519	74.25561	57.76013	55.21451	68.91606	90.56347
	60	600	9	155	101.621918322435	109.4121	149.0292	154.2021	83.12591	184.1043	137.7055	146.4751	145.5155	137.3819	109.0968
	70	600	9	155	0	127.2439	87.97878	105.2877	90.13028	98.48024	111.1241	93.37699	85.59596	77.13289	127.6301
	50	650	9	155	8.40405498377559	112.7241	70.42193	65.69499	77.06742	27.0376	79.38799	63.81706	70.62685	71.65047	108.8433
	60	650	9	155	25.3339628496423	130.5559	168.0352	151.4248	84.07179	146.5832	149.8802	167.866	140.2942	137.9451	127.3766
	70	650	9	155	30.9366661721594	148.3876	112.1862	116.4385	91.07616	93.44133	152.4891	109.8589	109.481	122.0889	145.9099
	50	550	12	155	33.0072304435245	75.83845	48.25317	52.94663	78.28522	26.36311	71.96586	67.32438	59.19145	33.15125	78.21097
	60	550	12	155	34.2252094266803	93.6702	114.1041	115.9741	85.28959	89.28504	112.1659	111.9036	114.2747	127.5586	96.74427
	70	550	12	155	35.0777947148895	111.502	60.95162	70.56914	92.29396	54.33008	95.15059	73.16027	72.85126	92.12444	115.2776
	50	600	12	155	35.6867842064674	96.98219	39.99337	45.38417	79.23111	38.20022	73.75431	34.5336	29.77982	71.56042	96.4908
	60	600	12	155	36.1739757997297	114.814	214.0435	235.7104	86.23548	227.1881	142.7584	237.6972	233.5793	226.8936	115.0241
	70	600	12	155	36.5393694946765	132.6457	210.4844	208.3794	93.23985	109.2517	144.6901	184.9548	212.8514	156.8918	133.5574
	50	650	12	155	0	118.1259	28.70747	30.22904	80.17699	17.07361	84.75404	30.05152	29.77982	39.4684	114.7706
	60	650	12	155	209.176159986188	135.9577	175.2651	183.5701	87.18136	171.7124	170.2189	184.9035	182.3353	192.6302	133.3039
	70	650	12	155	226.385954232664	153.7895	195.805	233.4895	94.18573	250.8022	168.1312	200.8642	186.2993	167.0211	151.8372
	50	550	15	155	229.315352856382	81.24029	59.98803	59.04881	81.39479	54.87389	75.5204	67.64832	59.19145	54.303	84.13829
	60	550	15	155	231.030528355702	99.07204	114.1569	107.8114	88.39916	115.7382	101.7317	120.4925	114.2747	94.59894	102.6716
	70	550	15	155	232.254510292599	116.9038	66.70845	55.07544	95.40353	53.33779	100.5728	57.81935	72.85126	146.3269	121.2049
	50	600	15	155	233.350814432641	102.384	42.19688	34.15979	82.34067	23.67438	82.9902	53.77112	43.77811	26.58285	102.4181
	60	600	15	155	233.957925994839	120.2158	142.7326	138.7898	89.34504	154.3584	139.2999	131.9895	131.4692	127.8043	120.9514
	70	600	15	155	234.452998471222	138.0475	109.0862	108.3575	96.34941	93.04728	154.4358	90.57144	82.28408	144.9646	139.4847
	50	650	15	155	234.820393150749	123.5278	66.12317	56.25392	83.28656	65.27242	94.86977	66.56111	70.2426	151.0618	120.6979
	60	650	15	155	235.187787830276	141.3595	214.0722	215.6035	90.29093	271.2419	166.3518	214.0715	206.8123	250.1121	139.2312
	70	650	15	155	13.9877973361765	159.1913	411.9768	500.8454	97.2953	570.6259	175.8996	541.3526	414.9649	311.6653	157.7645
	50	550	0	168	33.3235977412033	58.80635	76.37666	76.03234	70.39459	85.53065	83.19103	86.22955	82.74274	74.02915	59.27735
	60	550	0	168	68.3204572040227	76.6381	127.3002	134.9159	77.39896	127.6556	106.0733	129.6184	126.5656	130.4848	77.81065
	70	550	0	168	107.444970631272	94.46986	82.25317	88.72535	84.40333	74.40128	97.81982	79.58138	84.05325	60.21276	96.34395
	50	600	0	168	145.465446460601	79.95009	59.3387	64.98444	71.34048	54.85428	73.22871	65.08727	59.13191	55.46854	77.55718
	60	600	0	168	190.513726859441	97.78185	170.8861	162.1633	78.34485	178.4164	122.355	184.4182	190.462	172.8498	96.09048
	70	600	0	168	226.412373572275	115.6136	69.36908	71.08142	85.34922	69.75627	88.22997	70.84316	68.6098	68.01001	114.6238
	50	650	0	168	249.512409347839	101.0938	65.53312	66.26097	72.28636	46.42642	108.1379	51.68889	60.37304	49.33516	95.837
	60	650	0	168	252.353131356769	118.9256	169.4156	171.9607	79.29073	210.2896	128.997	190.0904	169.9616	164.5451	114.3703
	70	650	0	168	0	136.7574	68.48162	50.02776	86.2951	30.09207	112.5784	55.45817	51.78715	104.0983	132.9036
	50	550	3	168	10.0358241777652	64.20819	44.0487	47.27224	73.50416	30.05261	79.88402	29.34938	26.69765	50.70693	65.20468
	60	550	3	168	26.6930983374686	82.03994	124.7645	118.2744	80.50853	130.8122	104.1455	130.5845	126.5656	122.4063	83.73798
	70	550	3	168	40.5328886639512	99.8717	87.50161	79.60252	87.5129	86.28082	90.78933	81.23632	84.05325	44.91108	102.2713
	50	600	3	168	42.2428988919581	85.35193	49.83599	37.40025	74.45004	49.53879	66.94362	59.55073	43.21872	11.97906	83.4845
	60	600	3	168	43.2188952956791	103.1837	119.7779	132.7629	81.45441	115.2704	125.9228	111.0721	102.2863	144.6041	102.0178
	70	600	3	168	44.1965049165963	121.0154	59.02312	53.09942	88.45878	32.1844	81.69278	40.10436	40.14327	32.54116	120.5511
	50	650	3	168	44.9297121322842	106.4957	73.97333	76.06215	75.39593	85.03006	101.3138	86.16676	79.71048	74.63795	101.7643
	60	650	3	168	45.4185169427428	124.3274	222.0683	236.4748	82.4003	243.5572	130.4501	245.905	246.9031	205.0918	120.2976
	70	650	3	168	45.9073217532015	142.1592	69.38984	66.06897	89.40467	56.31619	113.2389	46.44484	40.14327	137.4216	138.8309
	50	550	6	168	0	69.61003	56.90967	57.99353	76.61373	60.62286	74.55488	45.97331	49.65239	63.3814	71.132
	60	550	6	168	84.7754954234136	87.44179	139.5304	131.2267	83.6181	125.3572	109.6066	153.7482	148.5916	143.8683	89.6653
	70	550	6	168	124.068459390684	105.2735	102.0665	96.87274	90.62246	105.7376	87.8847	105.6305	84.05325	80.22163	108.1986
	50	600	6	168	127.334815257359	90.75377	49.54834	46.82007	77.55961	56.94454	68.6807	39.1931	43.21872	21.95166	89.41183
	60	600	6	168	129.153125996136	108.5855	144.5094	151.8342	84.56398	126.3438	135.3271	143.3219	145.5155	163.3643	107.9451
	70	600	6	168	130.247414170965	126.4173	72.01814	78.52064	91.56835	66.71857	97.77936	64.54233	66.81969	65.14983	126.4784
	50	650	6	168	131.156569540353	111.8975	49.7422	55.51455	78.50549	59.79096	89.51444	50.70994	42.80112	39.78124	107.6917
	60	650	6	168	131.888846433207	129.7293	205.401	212.9686	85.50986	197.5852	142.479	205.7862	210.5617	179.0227	126.225
	70	650	6	168	132.250857715181	147.561	80.98141	76.78091	92.51423	68.80248	121.7395	73.01947	66.81969	125.2011	144.7583
	50	550	9	168	132.612868997156	75.01187	105.264	117.477	79.72329	61.56667	71.9285	116.6328	115.0211	93.42028	77.05933
	60	550	9	168	132.97488027913	92.84363	87.7448	105.0247	86.72766	93.12913	119.1973	82.03036	73.39092	100.0276	95.59263
	70	550	9	168	20.2347752023437	110.6754	85.95837	93.24843	93.73203	81.60596	97.3198	83.40027	84.05325	86.47907	114.1259
	50	600	9	168	23.1536222907046	96.15561	57.65769	65.90491	80.66918	58.42943	71.51704	59.56992	55.21451	68.51517	95.33915
	60	600	9	168	37.7454534103605	113.9874	165.1106	164.7286	87.67355	184.207	135.1629	144.8984	145.5155	136.0483	113.8725
	70	600	9	168	57.5666852031505	131.8191	91.18246	118.4473	94.67792	96.37472	119.2144	101.7052	85.59596	87.93192	132.4058
	50	650	9	168	69.9729874897586	117.2994	69.32087	73.21509	81.61506	28.39436	86.72606	64.01113	70.62685	73.68727	113.619
	60	650	9	168	78.5395873051045	135.1311	167.5465	168.5289	88.61943	145.9929	154.8016	173.4567	165.566	139.0491	132.1523
	70	650	9	168	85.0697262606137	152.9629	127.3253	127.8873	95.6238	94.51548	156.2119	110.161	109.481	135.3257	150.6856
	50	550	12	168	87.2672767044044	80.41371	58.51703	55.55237	82.83286	26.67642	72.37552	65.74165	59.19145	32.50488	82.98665
	60	550	12	168	90.570815336536	98.24547	113.296	114.2083	89.83723	89.67142	110.4931	113.7109	114.2747	125.9796	101.52
	70	550	12	168	0	116.0772	61.20897	61.78245	96.8416	53.26786	99.52872	77.08757	72.85126	102.678	120.0533
	50	600	12	168	67.0482692272827	101.5575	42.62929	46.15582	83.77874	38.14849	80.9277	34.32445	29.77982	72.4045	101.2665
	60	600	12	168	72.5640078607004	119.3892	217.4303	239.4825	90.78311	223.9239	138.5334	238.1067	233.5793	226.805	119.7998
	70	600	12	168	82.601824266238	137.221	215.1706	227.0753	97.78748	106.6758	144.0205	196.8355	212.8514	168.9358	138.3331
	50	650	12	168	84.0708863572093	122.7012	29.65016	34.93658	84.72463	18.79775	89.22657	29.2566	29.77982	42.75013	119.5463
	60	650	12	168	84.4387758225508	140.533	196.3443	194.0243	91.729	170.1952	172.9698	184.8841	182.3353	194.9791	138.0796
	70	650	12	168	84.8066652878923	158.3647	192.9108	232.9582	98.73337	253.9111	173.2312	209.1996	186.2993	181.5028	156.6129
	50	550	15	168	85.1745547532337	85.81555	63.35901	60.43486	85.94243	54.08411	77.76461	67.52361	59.19145	58.50606	88.91397
	60	550	15	168	85.5424442185752	103.6473	114.087	107.3024	92.9468	114.943	107.2849	122.4478	114.2747	97.86921	107.4473
	70	550	15	168	0	121.4791	69.31474	54.2987	99.95117	50.59095	104.9304	59.18159	72.85126	161.7299	125.9806
	50	600	15	168	115.96647701938	106.9593	38.54822	34.6332	86.88831	24.27731	81.6871	53.21666	43.77811	32.27632	107.1938
	60	600	15	168	118.86140210395	124.7911	150.8914	145.2212	93.89268	154.7574	143.5344	133.7659	131.4692	132.5651	125.7271
	70	600	15	168	121.2746255349	142.6228	121.1619	131.4956	100.8971	99.21058	159.5652	91.91266	82.28408	161.8581	144.2604
	50	650	15	168	122.963326697889	128.103	68.11205	79.21055	87.8342	65.15005	102.3617	66.1355	70.2426	159.1929	125.4736
	60	650	15	168	124.055662486591	145.9348	239.3239	262.9638	94.83857	276.7945	171.499	216.057	206.8123	257.3105	144.0069
	70	650	15	168	124.6631326344	163.7666	456.559	565.1216	101.8429	591.5125	176.0645	572.5194	414.9649	330.9963	162.5402
	50	550	0	192	128.697976589031	67.25298	76.2545	75.84566	78.79023	85.6856	86.31425	82.7554	82.74274	73.17889	68.09399
	60	550	0	192	129.424887256477	85.08474	127.3486	131.4869	85.7946	128.9299	102.6126	122.6071	126.5656	131.5729	86.62729
	70	550	0	192	0	102.9165	84.3538	85.19923	92.79897	83.32391	99.48194	82.60632	82.61779	67.76012	105.1606
	50	600	0	192	47.0112392877199	88.39673	60.42515	64.85317	79.73611	56.16531	81.42426	60.15597	59.13191	54.53194	86.37382
	60	600	0	192	54.1806759447709	106.2285	170.5869	157.0064	86.74048	183.2028	125.4916	178.8269	190.462	173.8517	104.9071
	70	600	0	192	60.5009471776976	124.0602	66.77755	64.94883	93.74485	76.99089	95.53315	73.16638	68.6098	75.47114	123.4404
	50	650	0	192	67.5387950400987	109.5405	68.92654	54.05706	80.682	49.6464	110.3997	46.3532	60.37304	47.42235	104.6536
	60	650	0	192	72.6137287299847	127.3722	149.854	148.1893	87.68637	214.3649	124.3808	180.4012	169.9616	164.5708	123.1869
	70	650	0	192	76.3702541093167	145.204	69.78328	38.21511	94.69074	34.76347	116.6944	54.64695	51.78715	110.5831	141.7202
	50	550	3	192	79.8791907468334	72.65482	43.2589	46.28171	81.8998	30.24913	80.93174	29.59827	26.69765	51.65858	74.02132
	60	550	3	192	82.6594319147662	90.48658	124.683	115.622	88.90417	127.2689	107.0748	127.4844	126.5656	125.2966	92.55462
	70	550	3	192	85.3147612099475	108.3183	97.5076	77.24462	95.90854	100.6674	94.09251	92.72607	138.8113	54.26034	111.0879
	50	600	3	192	17.0881060072276	93.79857	50.51062	34.85023	82.84568	48.2055	71.95991	59.90176	43.21872	12.84444	92.30114
	60	600	3	192	18.4449840736752	111.6303	118.8638	123.6439	89.85005	116.9077	132.1562	115.5183	102.2863	147.408	110.8344
	70	600	3	192	22.2572436745557	129.4621	55.08956	43.76893	96.85442	37.82	93.14031	42.15555	40.14327	41.80413	129.3677
	50	650	3	192	25.8193571673706	114.9423	74.26417	72.3385	83.79157	81.43637	107.483	89.27364	79.71048	74.52713	110.581
	60	650	3	192	26.803484618839	132.7741	221.0125	226.7215	90.79594	245.2212	135.7395	241.2367	246.9031	206.9194	129.1143
	70	650	3	192	27.0503393307458	150.6058	71.4142	69.45385	97.8003	72.46588	120.2169	43.79723	40.14327	145.7084	147.6476
	50	550	6	192	27.4197985495663	78.05666	54.87055	57.57461	85.00936	61.5615	75.04424	46.60861	49.65239	65.65331	79.94864
	60	550	6	192	27.6666532614731	95.88842	138.5219	129.203	92.01373	130.3037	108.3624	155.1751	148.5916	148.0788	98.48194
	70	550	6	192	28.0361124802936	113.7202	105.8794	93.06214	99.0181	122.6998	98.68142	122.7599	138.8113	90.89124	117.0152
	50	600	6	192	28.5281762060279	99.20041	48.49396	44.31676	85.95525	57.45389	74.29791	42.45108	43.21872	24.13733	98.22847
	60	600	6	192	54.4482660219669	117.0322	143.6387	142.8191	92.95962	129.7833	136.5525	144.5716	145.5155	167.4885	116.7618
	70	600	6	192	123.813941049647	134.8639	67.82039	67.56069	99.96399	67.57708	101.9199	72.70164	66.81969	75.73318	135.2951
	50	650	6	192	126.489092290822	120.3442	49.74477	52.55506	86.90113	60.35839	96.5742	51.84293	42.80112	40.99068	116.5083
	60	650	6	192	128.799593998531	138.1759	206.4602	202.813	93.9055	200.9149	140.8872	206.2963	210.5617	182.1706	135.0416
	70	650	6	192	130.26135611967	156.0077	83.24479	79.50977	100.9099	84.4369	130.6802	72.72493	66.81969	134.8082	153.5749
	50	550	9	192	131.110095706241	83.4585	102.986	110.9633	88.11893	62.62667	72.61162	117.4279	115.0211	91.8997	85.87597
	60	550	9	192	131.958835292811	101.2903	87.99807	98.6034	95.1233	103.5755	116.296	86.35631	73.39092	100.4456	104.4093
	70	550	9	192	132.807574879382	119.122	88.57257	82.76248	102.1277	91.46608	102.1732	89.26105	90.98726	93.35614	122.9426
	50	600	9	192	133.901523479779	104.6023	57.58188	57.11511	89.06482	58.9174	82.19216	61.40965	55.21451	66.90833	104.1558
	60	600	9	192	0	122.434	152.9577	142.9192	96.06918	182.2198	136.5386	142.053	145.5155	136.3799	122.6891
	70	600	9	192	9.13624268862099	140.2658	86.94289	89.29478	103.0736	88.28863	122.8612	117.4393	85.59596	94.72273	141.2224
	50	650	9	192	23.3906839410544	125.746	72.68873	68.51643	90.0107	34.6968	92.76194	64.53826	70.62685	71.10418	122.4356
	60	650	9	192	32.1465151100417	143.5778	171.12	156.4967	97.01507	146.2535	155.7816	182.3686	165.566	138.4044	140.9689
	70	650	9	192	40.7202484376129	161.4095	125.1867	123.7763	104.0194	100.0936	166.5096	106.608	109.481	141.1401	159.5022
	50	550	12	192	52.3885640134708	88.86035	60.8647	56.9613	91.2285	27.00002	78.1365	60.69549	59.19145	33.68501	91.80329
	60	550	12	192	76.4416949171966	106.6921	111.2739	106.7765	98.23287	95.63132	110.6699	115.6079	114.2747	129.0982	110.3366
	70	550	12	192	83.3733045046625	124.5239	56.90781	34.75346	105.2372	51.74224	108.214	83.95354	72.85126	112.2558	128.8699
	50	600	12	192	98.1318781056602	110.0041	39.74408	38.03161	92.17438	37.3902	81.76433	31.107	29.77982	73.49834	110.0831
	60	600	12	192	111.250490078126	127.8358	212.3673	214.0091	99.17875	214.606	142.9636	237.9659	233.5793	229.8373	128.6164
	70	600	12	192	133.290815224194	145.6676	158.4091	175.2919	106.1831	96.55775	146.2839	216.5462	212.8514	178.4272	147.1497
	50	650	12	192	39.2251980084501	131.1478	28.53537	19.11288	93.12027	25.80242	104.5095	27.43125	29.77982	42.86774	128.3629
	60	650	12	192	40.5580694623227	148.9796	192.3681	167.7611	100.1246	166.9003	176.1349	181.6194	182.3353	197.0352	146.8962
	70	650	12	192	44.9591820134073	166.8114	188.6537	207.5925	107.129	256.4669	175.587	221.3864	186.2993	190.018	165.4295
	50	550	15	192	49.0004417168631	94.26219	64.48627	64.03219	94.33806	53.52195	84.10461	65.47743	59.19145	57.54965	97.73061
	60	550	15	192	50.220469778499	112.0939	113.9375	103.9483	101.3424	118.315	104.3285	125.1896	114.2747	98.85141	116.2639
	70	550	15	192	50.3391446537809	129.9257	71.32044	52.45333	108.3468	47.4999	113.0317	61.78636	72.85126	169.1712	134.7972
	50	600	15	192	50.5853884648165	115.4059	49.27777	33.55196	95.28395	24.60806	92.06933	49.08224	43.77811	31.23364	116.0104
	60	600	15	192	50.5853884648165	133.2377	143.1629	131.8275	102.2883	155.3185	145.3104	136.835	131.4692	133.461	134.5437
	70	600	15	192	50.704828984455	151.0694	116.5337	122.9425	109.2927	108.1088	156.5993	91.08245	82.28408	169.2131	153.077
	50	650	15	192	50.8242695040934	136.5497	71.91553	75.50836	96.22983	64.79124	106.5123	66.83683	70.2426	157.1741	134.2903
	60	650	15	192	40.0606580027689	154.3814	227.1892	253.3498	103.2342	281.6393	170.392	218.0012	206.8123	257.23	152.8236
	70	650	15	192	140.325090095517	172.2132	474.0364	587.2764	110.2386	613.6973	182.585	624.7705	414.9649	337.3748	171.3569
	50	550	0	216	145.689788634425	75.69962	76.25596	78.59401	87.18587	86.21875	91.28255	78.95546	82.74274	72.57045	76.91063
	60	550	0	216	147.917022814184	93.53138	130.3557	139.1125	94.19024	128.6672	100.8245	115.036	126.5656	130.905	95.44393
	70	550	0	216	149.646248005918	111.3631	86.3531	92.58593	101.1946	84.71742	103.2899	87.3084	82.61779	72.18808	113.9772
	50	600	0	216	150.511263906084	96.84337	58.75022	68.61398	88.13175	55.57708	91.35529	52.7063	59.13191	53.18648	95.19046
	60	600	0	216	151.009272894108	114.6751	170.0343	170.8462	95.13612	183.8316	120.1558	172.5108	190.462	172.4466	113.7238
	70	600	0	216	151.507281882131	132.5069	79.06948	79.08101	102.1405	83.7103	105.7652	74.14106	68.6098	79.16209	132.2571
	50	650	0	216	152.12708876847	117.9871	63.84578	62.18783	89.07764	46.14776	114.2511	42.56297	60.37304	47.55827	113.4703
	60	650	0	216	0	135.8189	160.1319	163.2205	96.08201	214.3239	122.9752	169.186	169.9616	164.6471	132.0036
	70	650	0	216	11.1789396125375	153.6506	85.33057	53.27663	103.0864	40.83515	117.0002	51.0995	51.78715	115.7554	150.5369
	50	550	3	216	23.605893983093	81.10146	48.18328	49.33173	90.29543	30.21597	85.18475	31.11876	26.69765	50.51254	82.83796
	60	550	3	216	38.2640352009582	98.93322	126.497	121.8898	97.2998	124.3992	108.6044	124.8983	126.5656	124.0909	101.3713
	70	550	3	216	52.6632494182084	116.765	97.89593	86.66787	104.3042	105.7491	100.7796	107.9929	138.8113	58.15069	119.9046
	50	600	3	216	66.8260520262015	102.2452	49.60328	35.08038	91.24132	43.53589	78.72744	59.13331	43.21872	10.96137	101.1178
	60	600	3	216	86.9346866776708	120.077	119.3516	131.3488	98.24569	116.2176	130.3889	120.4299	102.2863	145.4653	119.6511
	70	600	3	216	113.409930662594	137.9087	65.62831	53.78351	105.2501	44.35695	103.7042	45.01991	40.14327	44.95749	138.1844
	50	650	3	216	135.976615045739	123.389	69.3524	83.93981	92.1872	71.52378	110.6198	92.65772	79.71048	74.12537	119.3976
	60	650	3	216	155.390367833885	141.2207	219.684	240.4857	99.19157	241.2806	129.2178	237.2327	246.9031	206.4582	137.9309
	70	650	3	216	174.240865361901	159.0525	94.87406	84.5248	106.1959	91.08334	122.6583	38.7855	40.14327	150.3432	156.4642
	50	550	6	216	79.0070435297041	86.5033	56.2106	60.97334	93.405	60.1293	79.01809	47.99526	49.65239	66.81417	88.76528
	60	550	6	216	101.123807733696	104.3351	142.673	139.5565	100.4094	138.5134	109.9516	157.3313	148.5916	149.18	107.2986
	70	550	6	216	107.105631488331	122.1668	119.3267	108.7008	107.4137	132.3708	102.3499	142.3866	138.8113	97.08846	125.8319
	50	600	6	216	113.869879261716	107.647	46.33753	42.89789	94.35089	55.14194	76.02177	44.78919	43.21872	24.5611	107.0451
	60	600	6	216	115.886235830412	125.4788	144.1683	154.7152	101.3553	130.7512	137.4848	146.2315	145.5155	167.8526	125.5784
	70	600	6	216	116.26089184566	143.3106	78.56665	86.93923	108.3596	68.51599	110.9921	82.86123	66.81969	81.19341	144.1117
	50	650	6	216	116.506983412686	128.7908	49.1888	61.03642	95.29677	59.94767	107.1047	53.29074	42.80112	42.89585	125.3249
	60	650	6	216	116.760637594314	146.6226	206.6523	219.5751	102.3011	201.7989	142.5693	208.7815	210.5617	184.0161	143.8582
	70	650	6	216	116.889202042536	164.4543	109.8459	102.7631	109.3055	106.6407	145.8913	69.42284	66.81969	141.7498	162.3915
	50	550	9	216	116.889202042536	91.90514	101.7975	113.9875	96.51457	61.17002	77.25742	116.692	115.0211	92.65064	94.69261
	60	550	9	216	58.0341913096839	109.7369	97.41685	108.7114	103.5189	120.2705	117.8264	90.29342	73.39092	101.1369	113.2259
	70	550	9	216	67.9713614190631	127.5687	93.09562	101.7501	110.5233	99.65692	108.3818	95.46348	90.98726	99.14348	131.7592
	50	600	9	216	70.5419834995487	113.0489	57.2686	66.97609	97.46045	57.98276	81.35193	60.79313	55.21451	66.92226	112.9724
	60	600	9	216	72.1356122727836	130.8806	149.7704	152.5039	104.4648	177.1979	139.2998	139.0487	145.5155	136.3342	131.5057
	70	600	9	216	73.4815468056996	148.7124	92.4149	110.1089	111.4692	79.71802	133.1204	133.9382	85.59596	99.77307	150.039
	50	650	9	216	74.5854363120634	134.1926	72.44481	71.44402	98.40634	44.93645	106.076	64.43841	70.62685	72.59944	131.2523
	60	650	9	216	75.564236085022	152.0244	173.018	166.5167	105.4107	148.7542	161.2435	190.5502	165.566	139.8401	149.7856
	70	650	9	216	76.0564605783846	169.8561	151.0074	149.8476	112.4151	115.4262	168.3204	99.32214	109.481	147.6718	168.3189
	50	550	12	216	76.7907300982995	97.30698	60.1074	56.11942	99.62414	26.69951	86.27203	53.19618	59.19145	34.1102	100.6199
	60	550	12	216	0	115.1387	114.8826	115.2612	106.6285	108.7818	115.1875	115.5014	114.2747	129.4638	119.1532
	70	550	12	216	35.0712492646884	132.9705	65.30568	75.59172	113.6329	53.50795	117.4226	90.74203	72.85126	117.7174	137.6865
	50	600	12	216	55.330280392312	118.4507	40.26852	48.11314	100.57	36.23815	84.48606	24.07354	29.77982	73.1865	118.8998
	60	600	12	216	62.4719353703907	136.2825	207.6713	226.3151	107.5744	202.5835	143.0663	236.5093	233.5793	229.4659	137.4331
	70	600	12	216	67.9155709559253	154.1142	223.1318	247.2023	114.5788	85.77976	152.798	233.0944	212.8514	183.1519	155.9664
	50	650	12	216	74.5709883712767	139.5945	36.31535	17.50479	101.5159	37.64017	112.235	24.49742	29.77982	44.0373	137.1796
	60	650	12	216	77.5969421370974	157.4262	193.2563	175.8739	108.5203	166.5315	169.2105	176.0315	182.3353	198.1452	155.7129
	70	650	12	216	82.9216419159217	175.258	208.223	264.8343	115.5246	262.4941	180.5138	231.8493	186.2993	196.224	174.2462
	50	550	15	216	87.5194492553476	102.7088	63.83952	65.82138	102.7337	53.50114	90.26387	61.88665	59.19145	61.29834	106.5473
	60	550	15	216	91.2697567726587	120.5406	116.0433	94.5697	109.7381	127.7649	108.7106	126.8632	114.2747	102.5404	125.0806
	70	550	15	216	94.1725644678551	138.3723	76.46127	70.50912	116.7424	49.8438	117.5241	65.11494	72.85126	177.9563	143.6139
	50	600	15	216	47.5221231529918	123.8526	47.48627	32.14417	103.6796	24.17868	101.0454	41.21177	43.77811	34.24529	124.8271
	60	600	15	216	50.7491735640523	141.6843	145.3862	123.1727	110.684	155.5926	145.948	139.8964	131.4692	136.4129	143.3604
	70	600	15	216	54.0157208000494	159.5161	153.8365	171.2025	117.6883	116.1488	161.0439	86.7526	82.28408	177.2611	161.8937
	50	650	15	216	56.4441134481439	144.9963	70.38656	73.01184	104.6255	65.17356	112.6603	69.46437	70.2426	161.6671	143.1069
	60	650	15	216	56.9283947490425	162.8281	228.0121	239.9308	111.6298	282.9189	170.7658	220.2645	206.8123	261.6633	161.6402
	70	650	15	216	57.289254179648	180.6598	486.8498	606.777	118.6342	619.8403	186.9267	672.7709	414.9649	346.9043	180.1735
	50	550	0	240	57.533677883562	84.14626	67.27167	62.5535	95.5815	87.80932	88.78297	75.91777	82.74274	86.91861	85.72727
	60	550	0	240	57.533677883562	101.978	130.1707	124.304	102.5859	126.3961	100.1103	108.5284	126.5656	145.4073	104.2606
	70	550	0	240	57.6570997538552	119.8098	83.33734	83.92016	109.5902	76.08028	103.6573	94.96041	82.61779	84.1107	122.7939
	50	600	0	240	57.6570997538552	105.29	57.06329	51.77929	96.52739	53.3044	93.62889	43.64509	59.13191	51.8512	104.0071
	60	600	0	240	48.342063118348	123.1218	162.625	150.8767	103.5318	176.9085	118.0824	166.6386	190.462	171.2655	122.5404
	70	600	0	240	102.00277861307	140.9535	80.78337	63.22348	110.5361	88.41742	112.9225	75.77866	68.6098	75.40125	141.0737
	50	650	0	240	110.235303973866	126.4337	65.01053	55.538	97.47327	35.03035	113.8782	40.17099	60.37304	67.45593	122.2869
	60	650	0	240	112.552485916542	144.2655	168.7332	147.9545	104.4776	202.6362	122.8736	158.7758	169.9616	184.699	140.8202
	70	650	0	240	113.894999888692	162.0973	94.37801	51.56352	111.482	46.64023	122.2539	45.49928	51.78715	133.2275	159.3535
	50	550	3	240	114.625977134587	89.5481	43.45061	34.84846	98.69107	30.97629	86.38758	34.36254	26.69765	61.17941	91.6546
	60	550	3	240	115.237513860842	107.3799	124.7805	107.7834	105.6954	121.7541	106.0189	124.0545	126.5656	134.9119	110.1879
	70	550	3	240	115.724800382105	125.2116	84.48718	75.40883	112.6998	97.44556	103.1782	127.3122	138.8113	66.39206	128.7212
	50	600	3	240	116.453325321322	110.6918	48.0999	22.32085	99.63696	36.33023	94.73562	57.53627	43.21872	5.944743	109.9344
	60	600	3	240	0	128.5236	121.8644	114.5994	106.6413	110.1753	124.5388	125.7659	102.2863	140.6029	128.4677
	70	600	3	240	7.62522766388619	146.3554	67.8571	37.85063	113.6457	49.90368	115.0804	50.56463	40.14327	37.51537	147.001
	50	650	3	240	13.0827132800013	131.8356	70.00098	73.98263	100.5828	55.13123	111.0356	95.87998	79.71048	90.3418	128.2142
	60	650	3	240	20.5847570128259	149.6673	207.646	218.5984	107.5872	224.9446	128.7869	235.9857	246.9031	222.8288	146.7475
	70	650	3	240	36.0863152561711	167.4991	101.0816	77.36914	114.5916	108.5822	128.3296	32.74539	40.14327	164.134	165.2809
	50	550	6	240	69.7013550584646	94.94994	52.831	54.70312	101.8006	57.63503	82.35188	50.11393	49.65239	86.83025	97.58192
	60	550	6	240	72.4385585006374	112.7817	140.0473	132.5369	108.805	148.5711	109.6656	160.5463	148.5916	169.3502	116.1152
	70	550	6	240	74.9466119886858	130.6135	107.7852	105.4592	115.8094	130.7605	104.6188	163.9814	138.8113	114.679	134.6485
	50	600	6	240	77.1030731909701	116.0937	47.68964	36.72477	102.7465	50.78881	86.71303	45.87044	43.21872	28.89369	115.8617
	60	600	6	240	79.2541906102794	133.9254	143.0044	143.4259	109.7509	127.4918	141.5668	147.8213	145.5155	172.3394	134.395
	70	600	6	240	80.6969279949698	151.7572	81.48108	77.39715	116.7553	69.89293	119.59	96.16603	66.81969	83.10044	152.9283
	50	650	6	240	21.2975230278222	137.2374	53.64743	59.68556	103.6924	57.27495	107.1066	54.14792	42.80112	68.46149	134.1416
	60	650	6	240	39.7405659875563	155.0692	201.0268	207.1705	110.6968	194.9402	144.2938	214.3847	210.5617	209.7359	152.6749
	70	650	6	240	52.3725710688627	172.9009	116.4755	104.1029	117.7011	132.4899	146.168	64.61222	66.81969	164.8897	171.2082
	50	550	9	240	60.7632338572699	100.3518	98.26323	108.597	104.9102	58.57771	83.75063	114.487	115.0211	111.7882	103.5092
	60	550	9	240	62.2464087093359	118.1835	101.0447	109.7926	111.9146	141.4806	112.6863	93.73815	73.39092	120.4286	122.0425
	70	550	9	240	62.8711755417895	136.0153	91.03837	93.72211	118.9189	104.5219	114.2575	101.8383	90.98726	115.8555	140.5758
	50	600	9	240	63.3725205039501	121.4955	62.75856	58.56025	105.8561	56.82925	84.94405	57.42645	55.21451	70.37636	121.7891
	60	600	9	240	63.3725205039501	139.3273	147.4288	137.4863	112.8605	169.9637	145.694	135.4305	145.5155	139.9425	140.3224
	70	600	9	240	63.5028957190485	157.159	94.03363	77.49589	119.8648	74.7512	138.2177	151.2602	85.59596	100.8016	158.8557
	50	650	9	240	63.5028957190485	142.6393	77.50047	69.59166	106.802	57.06019	110.5386	62.46069	70.62685	97.28656	140.0689
	60	650	9	240	64.5298396982711	160.471	168.2144	158.1734	113.8063	150.981	156	198.4756	165.566	164.6815	158.6022
	70	650	9	240	108.103759009787	178.3028	149.0112	134.0669	120.8107	140.5271	170.707	90.23022	109.481	169.9333	177.1355
	50	550	12	240	114.121946368805	105.7536	62.78025	54.08403	108.0198	26.67636	86.7381	43.80449	59.19145	33.38784	109.4366
	60	550	12	240	116.06883000318	123.5854	120.1743	123.2005	115.0241	127.898	111.472	113.4735	114.2747	128.8956	127.9699
	70	550	12	240	116.924057454067	141.4171	74.34742	78.88834	122.0285	59.52904	120.2319	97.75637	72.85126	114.5695	146.5032
	50	600	12	240	117.533236801646	126.8974	46.56169	48.94807	108.9657	36.46708	95.54701	13.54404	29.77982	56.78078	127.7164
	60	600	12	240	117.898725424593	144.7291	209.4399	226.8628	115.97	190.3821	135.7302	233.5324	233.5793	213.2143	146.2497
	70	600	12	240	118.26421404754	162.5609	211.0942	226.9652	122.9744	79.88548	152.0349	246.1782	212.8514	164.3204	164.783
	50	650	12	240	118.75395287548	148.0411	43.27308	29.47907	109.9115	53.05989	113.1566	19.57486	29.77982	48.8645	145.9962
	60	650	12	240	0	165.8729	198.5077	189.532	116.9159	169.3783	167.6881	169.9253	182.3353	203.1266	164.5295
	70	650	12	240	9.56118961041926	183.7046	202.3062	272.0569	123.9203	274.7644	178.9172	243.3389	186.2993	198.6256	183.0628
	50	550	15	240	16.9012241221684	111.1555	65.43609	63.07478	111.1293	53.65496	90.76961	57.74197	59.19145	27.45092	115.3639
	60	550	15	240	36.6231073624149	128.9872	120.8392	104.8791	118.1337	141.3333	108.595	127.7109	114.2747	68.84721	133.8972
	70	550	15	240	45.0892175505215	146.819	76.61302	64.89247	125.1381	58.27007	119.9477	69.72813	72.85126	141.6832	152.4305
	50	600	15	240	61.4893963426008	132.2992	51.03536	35.96425	112.0752	24.64045	101.9642	30.38603	43.77811	-15.2856	133.6437
	60	600	15	240	63.6941416597177	150.131	154.214	136.8783	119.0796	155.9495	142.0892	143.1852	131.4692	87.03627	152.177
	70	600	15	240	66.9994363263315	167.9627	148.8753	152.0248	126.084	124.8831	160.9445	80.02295	82.28408	125.3046	170.7103
	50	650	15	240	70.4911947329641	153.443	75.08437	89.67691	113.0211	67.46656	112.3901	73.66021	70.2426	133.369	151.9235
	60	650	15	240	73.6136722776825	171.2747	241.8855	264.8548	120.0255	281.9675	166.5171	225.2274	206.8123	233.5198	170.4568
	70	650	15	240	75.2699662291123	189.1065	461.6763	601.6657	127.0298	612.8291	186.1822	719.1919	414.9649	316.1809	188.9902

## Sheet: sheet 7
	Table S5. Experimental and predicted NH3 emission, µg NH3·g-1d.m in different machine learning models
	Temperature	Biochar type	Biochar_dose	Time	Experimental data	Linear Regression	Random Forest	Generalized Boosted Regression Models	SVM with Linear Kernel	SVM with Radial Basis Function Kernel	k-Nearest Neighbors	Bayesian Regularized Neural Network	Recursive Partitioning and Regression Trees	Extreme Gradient Boosting Tree	Partial Least Squares Regression
	50	550	0	24	0.977350021278001	11.38636	1.041589	-2.11566	5.026657	4.812783	4.884433	1.313647	5.696168	-35.0527	11.57244
	60	550	0	24	3.19874404956509	20.04606	3.297147	1.796578	9.166197	3.73049	15.77023	-7.90815	5.696168	26.95509	19.30512
	70	550	0	24	0.429609531319065	28.70576	0.460069	-2.69356	13.30574	4.053378	3.296954	-2.15958	5.696168	-21.6364	27.0378
	50	600	0	24	0	-6.64159	0.604583	-2.29987	-3.61557	4.075326	2.299398	-5.33457	1.619596	5.431252	-6.72157
	60	600	0	24	0	2.018113	1.946889	-9.79058	0.523969	4.587069	3.601873	4.743209	1.619596	-7.38543	1.011115
	70	600	0	24	0	10.67781	0.695461	3.405075	4.663509	4.460382	3.426569	-3.46641	1.619596	3.235726	8.743797
	50	650	0	24	0	-24.6695	0.006594	-6.05911	-12.2578	3.89057	0	2.670696	1.619596	11.79952	-25.0156
	60	650	0	24	0	-16.0098	0.60738	7.144948	-8.11826	-1.36647	15.13605	-0.425	1.619596	25.91835	-17.2829
	70	650	0	24	0	-7.35014	0.000441	1.529506	-3.97872	3.885611	0	0.388902	1.619596	-5.86328	-9.55021
	50	550	3	24	0	2827-10-01	1.466947	-1.34889	5.031144	4.504374	4.656529	4.635004	5.696168	-21.851	10.472
	60	550	3	24	0	18.94239	3.369934	9.301455	9.170684	3.329	12.39457	-2.48271	5.696168	28.21779	18.20468
	70	550	3	24	0	27.60209	0.317866	-2.44345	13.31022	3.126323	4.165746	1.407094	5.696168	-6.72569	25.93736
	50	600	3	24	0	-7.74525	1.408036	0.522164	-3.61108	3.616323	2.713944	-3.98388	1.619596	10.12087	-7.82201
	60	600	3	24	0.556913142723477	0.914445	1.509766	-0.23045	0.528455	3.624668	3.870541	2.360726	1.619596	-14.6348	-0.08933
	70	600	3	24	10.331369135655	9.574143	0.917734	1.125	4.667995	3.875931	3.958893	-0.46848	1.619596	9.63435	7.643353
	50	650	3	24	34.9001181350266	-25.7732	0.010376	-5.32431	-12.2533	5517-02-01	0	1.34071	1.619596	7.079885	-26.116
	60	650	3	24	53.1576738834708	-17.1135	0.671275	-0.12873	-8.11377	-1.53525	9.318927	-5.75669	1.619596	9.259751	-18.3833
	70	650	3	24	68.2386065781628	-8.45381	-4.26E-16	-2.39094	-3.97423	2.383509	0	-2.76027	1.619596	-8.8739	-10.6507
	50	550	6	24	72.8109288383405	9.179029	1.444126	-0.60139	5.03563	5.313137	4.339177	5.968699	5.696168	-15.841	9.371551
	60	550	6	24	79.4260683101471	17.83873	4.609305	10.04895	9.17517	6.562993	15.64381	0.260755	5.696168	27.55361	17.10423
	70	550	6	24	105.176520406364	26.49842	0.359701	-2.55304	13.31471	-0.13377	4.228993	-1.69044	5.696168	-3.5373	24.83691
	50	600	6	24	132.584309014997	-8.84892	0.854757	6.708981	-3.6066	4.451308	3.005092	-4.48988	1.619596	18.00918	-8.92245
	60	600	6	24	159.178382747256	-0.18922	1.573463	-0.25126	0.532942	5.237828	3.950178	-1.80161	1.619596	-13.4207	-1.18977
	70	600	6	24	0	8.470475	0.947558	-1.219	4.672482	4.814846	5.710325	1.162353	1.619596	14.70096	6.542908
	50	650	6	24	0	-26.8769	-3.55E-16	-1.32267	-12.2488	3.890266	0	0.756792	1.619596	2.112055	-27.2165
	60	650	6	24	0	-18.2172	0.779769	3.124133	-8.10929	3.708555	6.514109	-3.84409	1.619596	-2.38233	-19.4838
	70	650	6	24	0	-9.55747	-5.12E-16	-4.84061	-3.96975	3.896725	0	-3.32854	1.619596	-16.6634	-11.7511
	50	550	9	24	0	8.075362	1.413398	-2.01294	5.040117	4.997951	3.973326	5.663164	5.696168	-11.4394	8.271107
	60	550	9	24	0	16.73506	11.36589	16.33518	9.179657	11.88956	16.81366	1.577448	5.696168	32.3774	16.00379
	70	550	9	24	0	25.39476	0.419061	-2.92318	13.3192	-2.30097	8.400153	-7.89377	5.696168	-2.73713	23.73647
	50	600	9	24	0	-9.95259	0.426257	-1.19693	-3.60211	4.072135	2.453337	-2.70379	1.619596	13.98714	-10.0229
	60	600	9	24	0	-1.29289	3.166224	0.894381	0.537428	6.027922	4.521331	1.963272	1.619596	-17.0206	-2.29022
	70	600	9	24	0	7.366808	1.045808	0.761652	4.676968	3.780783	3.298682	0.398414	1.619596	7.077535	5.442464
	50	650	9	24	0	-27.9805	0.003794	-1.79273	-12.2443	3.896423	0	0.708881	1.619596	9.058549	-28.3169
	60	650	9	24	0	-19.3208	2.591039	2.818296	-8.1048	5.725571	6.036032	-1.93374	1.619596	4.986368	-20.5842
	70	650	9	24	0	-10.6611	0.003672	-4.31145	-3.96526	3.906166	0.006747	-1.46543	1.619596	-13.3183	-12.8515
	50	550	12	24	0	6.971694	2.360094	2.545894	5.044603	3.402372	3.583696	4.021665	5.696168	-9.81418	7.170662
	60	550	12	24	0	15.63139	8.892907	9.390179	9.184143	11.04985	17.18047	4.046404	5.696168	20.72158	14.90334
	70	550	12	24	0	24.29109	0.564853	12.90411	13.32368	4.069083	15.12446	-3.99971	5.696168	10.02127	22.63603
	50	600	12	24	0	-11.0563	0.33696	0.29038	-3.59762	2.899429	1.949559	0.293041	1.619596	12.17944	-11.1233
	60	600	12	24	0	-2.39656	3.035998	-0.22108	0.541915	4.32782	4.413028	6.093917	1.619596	-32.1093	-3.39066
	70	600	12	24	0	6.26314	1.010152	1.589672	4.681455	3.049009	3.341683	-2.74632	1.619596	16.40299	4.34202
	50	650	12	24	0	-29.0842	0.012098	0.326488	-12.2399	2.646952	0	-0.41656	1.619596	8.17668	-29.4173
	60	650	12	24	0.678521193269685	-20.4245	2.500392	4.937512	-8.10031	5.132808	6.661865	-0.07323	1.619596	-9.17653	-21.6847
	70	650	12	24	2.34407803752741	-11.7648	0.006699	-3.48343	-3.96077	2.495152	0.00759	1.295308	1.619596	-3.06704	-13.952
	50	550	15	24	18.3193146899217	5.868026	2.456038	0.03485	5.04909	5.285305	3.57854	2.108928	5.696168	-6.40338	6.070218
	60	550	15	24	30.465929787756	14.52772	10.65923	6.879136	9.18863	2024-11-05	17.10159	8.336181	5.696168	21.90414	13.8029
	70	550	15	24	35.7673325910492	23.18742	5.918757	41.45889	13.32817	4.423444	22.6137	21.78407	5.696168	22.26249	21.53558
	50	600	15	24	38.1729800972767	-12.1599	0.362496	-0.03631	-3.59314	4.268244	2.189455	-2.79058	1.619596	8.147056	-12.2238
	60	600	15	24	42.7987452076793	-3.50023	2.545401	-0.54778	0.546402	5.195841	4.914833	1.224576	1.619596	-38.3699	-4.49111
	70	600	15	24	59.388884803491	5.159472	0.944647	-1.4154	4.685941	3.585335	2.357787	-0.73444	1.619596	21.20103	3.241576
	50	650	15	24	77.150939367219	-30.1879	0.006354	-0.87088	-12.2354	3.896134	0	-6.45121	1.619596	4.842916	-30.5178
	60	650	15	24	99.291230740618	-21.5282	3.359898	3.740143	-8.09583	7.070181	6.76615	1.080899	1.619596	-14.7385	-22.7851
	70	650	15	24	0	-12.8685	0.047969	-7.73841	-3.95629	3.893144	0.091095	2.530911	1.619596	2.429638	-15.0524
	50	550	0	48	0	17.60388	6.022489	5.189848	9.025192	4.02339	5.753585	3.340799	5.696168	-30.614	18.16727
	60	550	0	48	0	26.26358	7.710592	9.102088	13.16473	7.83529	22.25671	10.64588	5.696168	34.12176	25.89996
	70	550	0	48	0	34.92327	2.242092	-2.69356	17.30427	2.429481	5.874537	-0.01425	5.696168	-16.737	33.63264
	50	600	0	48	0	-0.42407	0.924666	5.005637	0.382964	2.241207	3.053299	-0.94722	1.619596	5.968256	-0.12673
	60	600	0	48	0	8.235626	5.268235	-2.48507	4.522503	4.942239	5.839591	6.536548	1.619596	-4.12049	7.605951
	70	600	0	48	0	16.89532	2.414007	3.405075	8.662043	4.689263	9.93432	0.833745	1.619596	4.233356	15.33863
	50	650	0	48	0	-18.452	0.081248	1.246401	-8.25926	2.141866	0	0.753769	1.619596	12.12581	-18.4207
	60	650	0	48	0	-9.79232	8.78426	14.45046	-4.11972	11.66624	18.84424	18.98121	1.619596	28.97256	-10.6881
	70	650	0	48	0	-1.13263	0.069117	1.529506	0.019815	2.572997	0	0.513159	1.619596	-5.07637	-2.95537
	50	550	3	48	0	16.50021	6.411175	1.406638	9.029678	3.27371	4.656529	6.437074	5.696168	-18.3258	17.06683
	60	550	3	48	0	25.15991	8.568202	12.05698	13.16922	7.121651	12.39457	16.43755	5.696168	34.47094	24.79951
	70	550	3	48	0	33.81961	2.02922	0.225681	17.30876	5.367521	4.165746	6.007072	5.696168	-2.73982	32.53219
	50	600	3	48	0	-1.52774	2.96481	3.277689	0.38745	3.189582	2.713944	1.080582	1.619596	9.744373	-1.22718
	60	600	3	48	0	7.131959	3.052023	2.525079	4.52699	2.826974	3.870541	5.156053	1.619596	-12.2834	6.505507
	70	600	3	48	0	15.79166	2.736447	3.794129	8.66653	5.630563	3.958893	4.362333	1.619596	9.718473	14.23819
	50	650	3	48	0	-19.5557	-6.75E-16	-2.56878	-8.25478	0.6759	0	-0.12865	1.619596	6.492663	-19.5212
	60	650	3	48	0	-10.896	3.638066	2.626793	-4.11524	6.099173	9.318927	8.935742	1.619596	11.40047	-11.7885
	70	650	3	48	0	-2.23629	-2.49E-16	0.278188	0.024301	0.85783	0	-2.45781	1.619596	-9.0005	-4.05582
	50	550	6	48	0	15.39654	6.160456	2.154135	9.034165	3.956853	4.339177	7.538365	5.696168	-11.792	15.96639
	60	550	6	48	0.800399790443506	24.05624	12.24153	12.80448	13.1737	10.40566	15.64381	17.6303	5.696168	34.33054	23.69907
	70	550	6	48	2.82711167628945	32.71594	1.412915	0.116092	17.31324	1.398836	4.228993	5.367743	5.696168	0.97232	31.43175
	50	600	6	48	13.112517541297	-2.63141	2.714541	9.464506	0.391937	5.334071	3.005092	-0.27486	1.619596	18.15644	-2.32762
	60	600	6	48	18.9964178330964	6.028291	3.609037	2.50426	4.531476	3.910871	3.950178	0.82876	1.619596	-10.5455	5.405062
	70	600	6	48	19.9750697432861	14.68799	2.955131	1.450133	8.671016	6.527889	5.710325	5.813642	1.619596	15.30884	13.13774
	50	650	6	48	21.2644160321443	-20.6594	-3.48E-16	1.432856	-8.25029	2.780103	0	-0.1965	1.619596	2.048595	-20.6216
	60	650	6	48	23.0427544542403	-11.9997	3.682782	5.879657	-4.11075	6.713763	6.514109	7.186509	1.619596	0.282139	-12.8889
	70	650	6	48	31.5127226613379	-3.33996	-7.11E-16	-2.17148	0.028788	2.884665	0	-3.19155	1.619596	-16.2662	-5.15626
	50	550	9	48	41.4062854299705	14.29288	4.230828	0.742585	9.038651	3.839017	3.973326	6.925554	5.696168	-7.85859	14.86594
	60	550	9	48	58.5019284858741	22.95257	20.62738	19.0907	13.17819	17.37106	16.81366	15.1029	5.696168	38.68616	22.59862
	70	550	9	48	0	31.61227	2.823298	-0.25405	17.31773	2.823088	8.400153	1.925836	5.696168	1.304319	30.33131
	50	600	9	48	0	-3.73507	1.528651	1.558592	0.396423	3.721602	2.453337	-0.35605	1.619596	13.66622	-3.42806
	60	600	9	48	0	4.924624	3.423569	3.649905	4.535963	5.06334	4.521331	4.440331	1.619596	-14.6135	4.304618
	70	600	9	48	0	13.58432	2.798072	3.43078	8.675503	3.968963	3.298682	3.79877	1.619596	7.217248	12.0373
	50	650	9	48	0	-21.763	-6.75E-16	0.962796	-8.2458	2.87399	0	0.693327	1.619596	8.526917	-21.7221
	60	650	9	48	0	-13.1033	5.573141	5.57382	-4.10627	7.203885	6.036032	7.491633	1.619596	7.182668	-13.9894
	70	650	9	48	0	-4.44363	-8.31E-16	-1.64232	0.033275	2.746899	0.006747	-1.81301	1.619596	-13.3893	-6.25671
	50	550	12	48	0	13.18921	4.466705	5.301419	9.043138	2.060904	3.583696	4.679458	5.696168	-4.4838	13.7655
	60	550	12	48	0	21.84891	17.89827	12.1457	13.18268	15.33772	17.18047	13.96032	5.696168	28.77989	21.49818
	70	550	12	48	0	30.5086	8.648623	15.57324	17.32222	23.26885	15.12446	9.28204	5.696168	15.81226	29.23086
	50	600	12	48	0	-4.83874	1.354173	3.045904	0.40091	1.704548	1.949559	2.349342	1.619596	13.60809	-4.52851
	60	600	12	48	0	3.820956	5.303848	2.534441	4.54045	3.335743	4.413028	9.042636	1.619596	-27.9527	3.204174
	70	600	12	48	0	12.48065	2.002059	2588-04-01	8.679989	3.086727	3.341683	-1.134	1.619596	18.29226	10.93686
	50	650	12	48	0	-22.8667	0.001093	3.082012	-8.24132	1.334973	0	1.636141	1.619596	9.394603	-22.8225
	60	650	12	48	0	-14.207	6.346673	7.693036	-4.10178	5.646092	6.661865	8.329361	1.619596	-5.23069	-15.0898
	70	650	12	48	0	-5.5473	0.012014	-0.8143	0.037761	0.79338	0.00759	0.076288	1.619596	-1.38849	-7.35715
	50	550	15	48	0	12.08554	3.995553	1.653457	9.047625	3.84644	4.172887	1.492653	5.696168	-1.02121	12.66505
	60	550	15	48	0	20.74524	17.98282	8.497743	13.18716	12.44592	19.89261	16.11336	5.696168	30.01424	20.39774
	70	550	15	48	0	29.40494	18.69824	42.9911	17.3267	25.37193	37.28509	38.33816	5.696168	28.10529	28.13042
	50	600	15	48	0	-5.94241	1.477424	1.582294	0.405396	3.674907	2.758755	1.761946	1.619596	9.627482	-5.62895
	60	600	15	48	2.5715527560026	2.717289	5.510723	1.07083	4.544936	3.927995	5.433759	4.950614	1.619596	-34.1615	2.10373
	70	600	15	48	6.41475065129765	11.37699	1.807175	0.116809	8.684476	2.666165	5.221248	-0.04156	1.619596	23.14209	9.836411
	50	650	15	48	11.5587303825878	-23.9704	0.003352	0.747726	-8.23683	2.715616	0	-1.23924	1.619596	6.11262	-23.923
	60	650	15	48	14.6627412679528	-15.3107	7.631227	5.358749	-4.09729	7.08439	7.761998	7.671206	1.619596	-10.7409	-16.1903
	70	650	15	48	15.0213478399253	-6.65096	0.032475	-6.2062	0.042248	2.301975	0.01656	0.351224	1.619596	4.159973	-8.45759
	50	550	0	72	16.9739988744449	23.82139	6.858427	6.505868	13.02373	6.187732	6.57771	4.946392	5.638901	-24.8323	24.76211
	60	550	0	72	18.106849863867	32.48109	22.77775	17.48216	17.16327	23.45235	31.55139	30.71882	24.99436	46.31218	32.49479
	70	550	0	72	20.4833163367582	41.14079	7.238856	7.315665	21.30281	2.433309	7.151726	3.645386	4712-09-01	-4.87577	40.22747
	50	600	0	72	26.0810192159641	5.793443	3.162373	5.088463	4.381498	2.76532	4.063577	3.859888	2.359773	5.708391	6.468105
	60	600	0	72	35.2066834979282	14.45314	11.46115	0.140807	8.521038	8.350305	6.58298	7.541636	6.140605	2.028406	14.20079
	70	600	0	72	0	23.11284	6.99697	11.83869	12.66058	5.327976	12.21913	7.978488	3.092245	10.05308	21.93347
	50	650	0	72	0	-12.2345	0.392713	0.854683	-4.26073	2.911512	0	-0.1341	2.359773	12.35197	-11.8259
	60	650	0	72	0	-3.57481	34.8157	29.64529	-0.12119	35.14824	27.28925	34.43576	16.22822	35.60746	-4.09322
	70	650	0	72	0	5.084889	0.84462	-2.34336	4.018349	3.279391	0	0.974937	3.092245	1.229372	3.639462
	50	550	3	72	0	22.71772	7.499169	2.722659	13.02821	5.068918	6.885854	7.810703	5.638901	-12.3603	23.66167
	60	550	3	72	0	31.37742	23.7081	20.43705	17.16775	24.1866	29.27124	37.45469	24.99436	46.84521	31.39435
	70	550	3	72	0	40.03712	11.52327	10.23491	21.30729	10.78836	8.457602	11.40282	4712-09-01	9.305285	39.12703
	50	600	3	72	0	4.689775	5.539729	3.360514	4.385985	4.83249	5.034229	7.025068	2.359773	9.668372	5.36766
	60	600	3	72	0	13.34947	6.133805	5.150959	8.525524	4.966075	6.181274	7.345774	6.140605	-5.95059	13.10034
	70	600	3	72	0	22.00917	8.381451	12.22774	12.66506	8.813463	8.683408	11.62323	3.092245	15.72206	20.83302
	50	650	3	72	0	-13.3382	0.043788	-2.9605	-4.25624	0.699284	0	-0.83957	2.359773	6.902692	-12.9263
	60	650	3	72	0	-4.67848	20.80978	17.82163	-0.1167	20.56599	20.49495	18.99956	16.22822	18.21924	-5.19366
	70	650	3	72	0	3.981221	0.049182	-3.59468	4.022836	1.102523	0	-1.44065	3.092245	-2.5109	2.539018
	50	550	6	72	0	21.61406	5.576465	5.550079	13.0327	5.908813	6.264849	8.775367	5.638901	-6.93541	22.56122
	60	550	6	72	0	30.27375	24.00886	23.26447	17.17224	27.22057	31.94576	37.75903	24.99436	45.59585	30.2939
	70	550	6	72	0	38.93345	2108-12-01	14.86053	21.31178	7.157132	8.995564	12.39616	4712-09-01	11.90848	38.02659
	50	600	6	72	0	3.586107	6.915109	11.62726	4.390471	9.111296	5.711414	5.460617	2.359773	16.97151	4.267216
	60	600	6	72	0	12.24581	6.19238	7.210064	8.530011	5.367536	6.035411	2.376095	6.140605	-5.32172	9999-11-01
	70	600	6	72	0	20.9055	8.785736	14.61896	12.66955	11.46156	10.68851	12.90687	3.092245	20.2035	19.73258
	50	650	6	72	0	-14.4418	0.005417	0.911293	-4.25176	3.409639	0	-0.84975	2.359773	1.349688	-14.0268
	60	650	6	72	2.35257564499469	-5.78214	13.75649	7.901149	-0.11222	13.02929	13.18907	13.54477	16.22822	5.991995	-6.29411
	70	650	6	72	5.82435500293908	2.877554	0.029343	-0.14999	4.027323	3.599902	0	-2.09545	3.092245	-10.8856	1.438574
	50	550	9	72	8.86229596597668	20.51039	5.246105	4.138529	13.03719	5.568803	5.497653	8.094901	5.638901	-4.71915	21.46078
	60	550	9	72	10.538343555568	29.17009	29.23722	29.5507	17.17673	31.01167	30.1492	31.35804	24.99436	48.23436	29.19346
	70	550	9	72	11.09677897714	37.82978	9.640995	14.49039	21.31627	2665-10-01	17.0418	11.60651	4712-09-01	10.52335	36.92614
	50	600	9	72	13.6459648686217	2.48244	5.225899	3.721342	4.394958	5.657452	5.097844	3.774922	2.359773	10.76415	3.166772
	60	600	9	72	15.1356383585937	11.14214	4.936403	8.355709	8.534498	6.199179	6.413511	4.731074	6.140605	-11.1069	10.89945
	70	600	9	72	17.247362996314	19.80184	5.737881	10.19942	12.67404	7.661455	7.256482	9.730986	3.092245	10.39476	18.63214
	50	650	9	72	20.6607410318671	-15.5455	-1.32E-15	0.441234	-4.24727	3.422888	0	-0.00281	2.359773	6.110872	-15.1272
	60	650	9	72	25.8740223588012	-6.88581	11.59978	7.595312	-0.10773	11.06011	10.31081	12.69163	16.22822	11.17538	-7.39455
	70	650	9	72	0	1.773886	0.001069	0.379171	4.031809	3.357871	0.013493	-1.08515	3.092245	-9.7258	0.33813
	50	550	12	72	0	19.40672	5.311206	8.697363	13.04167	3.410113	4.787415	5.670199	5.638901	0.340765	20.36033
	60	550	12	72	0	28.06642	23.24112	22.6057	17.18121	24.08697	27.37757	25.59284	35.27932	40.01322	28.09302
	70	550	12	72	0	36.72612	53.52099	41.60611	21.32075	45.86885	29.16902	23.05146	35.27932	26.7164	35.8257
	50	600	12	72	0	1.378772	3.47653	5.208654	4.399444	2.742743	3.905773	5.412472	2.359773	12.39114	2.066328
	60	600	12	72	0	10.03847	6.08264	7.240245	8.538984	4.571842	6.12803	9.13396	6.140605	-22.7609	9.799009
	70	600	12	72	0	18.69817	4.826216	11.02744	12.67852	6205-06-01	6.480191	3.109636	3.092245	23.1549	17.53169
	50	650	12	72	0	-16.6492	-1.27E-15	2.56045	-4.24278	1.572042	0	2.101769	2.359773	8.663685	-16.2277
	60	650	12	72	0	-7.98948	9.675033	9.714528	-0.10324	8.463666	9.860654	13.03487	16.22822	0.447155	-8.495
	70	650	12	72	0	0.670218	0.052681	1.207191	4.036296	1.015984	0.01518	-0.03814	3.092245	3.960168	-0.76231
	50	550	15	72	0	18.30305	4.073362	5.049402	13.04616	5.039009	4.663352	1.785465	5.638901	4.125594	19.25989
	60	550	15	72	0	26.96275	21.57834	18.95774	17.1857	19.60441	24.73334	24.27673	35.27932	41.56981	26.99257
	70	550	15	72	0	35.62245	58.92885	69.02396	21.32524	54.42495	39.73622	56.18707	35.27932	39.3317	34.72525
	50	600	15	72	0	0.275105	4.059638	3.745044	4.403931	6.010753	4.447515	6.043622	2.359773	8.732783	0.965883
	60	600	15	72	0	8.934802	5.063589	5.776634	8.543471	5.666501	6.001288	5.845701	6.140605	-28.6475	8.698565
	70	600	15	72	0	17.5945	4.603729	6.885445	12.68301	5.64262	6.926927	3.360998	3.092245	28.32699	16.43125
	50	650	15	72	0	-17.7528	0.04493	0.226164	-4.2383	3.183798	0	2.0781	2.359773	5.703949	-17.3281
	60	650	15	72	0	-9.09315	10.37103	7.380241	-0.09876	9.171861	9.077643	11.05884	16.22822	-4.74083	-9.59544
	70	650	15	72	0	-0.43345	0.088655	-4.18471	4.040782	2.670464	0.021859	-0.66984	3.092245	9.830882	-1.86276
	50	550	0	96	0	30.03891	7.622196	8.992452	17.02226	9.211393	7.796482	5.927834	7.977391	-17.7587	31.35695
	60	550	0	96	3.63375152765627	38.6986	51.80057	59.38576	21.1618	48.2512	53.71769	52.72745	54.55444	63.43256	39.08963
	70	550	0	96	8.12240063604215	47.3583	8.134551	3.130746	25.30134	4.66005	13.13073	8.716275	15.14427	4.591981	46.82231
	50	600	0	96	10.6163704304614	12.01096	4.002947	6.861928	8.380033	4.999358	7.33734	8.604982	10.26181	6.550207	13.06294
	60	600	0	96	12.145894141331	20.67065	11.89168	4.144814	12.51957	12.43784	9.588665	8.636082	10.76641	12.91698	20.79562
	70	600	0	96	12.8777359500257	29.33035	12.05082	10.34319	16.65911	9.659127	22.32906	18.3928	24.95038	13.28902	28.5283
	50	650	0	96	16.4351894476855	-6.01699	0.004726	3.952498	-0.2622	3.878861	0	-0.32601	0	11.86433	-5.23107
	60	650	0	96	17.6584758332136	2.642705	57.01351	46.43665	3.877344	57.05706	40.49891	47.62795	46.90739	45.16656	2.501616
	70	650	0	96	18.8257407804529	3024-11-01	0.280756	-4.37562	8.016884	3.909649	0	1.454965	0	3.135861	2343-10-01
	50	550	3	96	20.0420127202809	28.93524	8.362238	4.954356	17.02675	7.857852	8.145191	8.543388	7.977391	-5.3132	30.2565
	60	550	3	96	23.4431070264694	37.59494	55.66189	62.08576	21.16629	52.20439	53.83373	60.92997	54.55444	63.93914	37.98918
	70	550	3	96	0	46.25463	17.32915	2946-11-01	25.30583	17.39686	14.02028	17.95518	15.14427	18.74649	45.72187
	50	600	3	96	0	10.90729	6.747669	4.879093	8.384519	7.053895	9.468143	13.24541	10.26181	10.48366	9625-11-01
	60	600	3	96	0	19.56699	8.367943	8.900079	12.52406	8.160476	9.093411	10.28616	10.76641	4.911459	19.69518
	70	600	3	96	0	28.22668	16.5078	15.97686	16.6636	14.4459	19.33707	21.09526	24.95038	18.93149	27.42786
	50	650	3	96	0	-7.12066	0.014007	-1.23608	-0.25771	0.327073	0	-0.95312	0	6.388523	-6.33151
	60	650	3	96	0	1.539037	29.39521	28.5547	3.881831	32.74348	32.54811	25.97234	46.90739	27.75183	1.401172
	70	650	3	96	0	10.19873	0.059682	-1.50082	8.021371	0.901238	0	-0.04821	0	-0.63094	9.133854
	50	550	6	96	0	27.83157	7.985833	8.019022	17.03123	9.658025	7.743481	9.434621	7.977391	0.147295	29.15606
	60	550	6	96	0	36.49127	54.70852	63.20011	21.17077	55.83499	55.93998	61.147	54.55444	62.72535	36.88874
	70	550	6	96	0	45.15097	17.06352	14.20715	25.31031	15.15925	15.67547	19.76143	15.14427	21.38528	44.62142
	50	600	6	96	0.367196760836399	9.803621	7.721476	13.38308	8.389006	14.42906	10.18212	12.03549	10.26181	17.82238	10.86205
	60	600	6	96	0.735328911831848	18.46332	8.345764	9.246108	12.52855	8.497773	8.542769	4.882735	9.033917	5.575932	18.59473
	70	600	6	96	3.00046972098567	27.12302	16.82428	16.655	16.66809	18.84693	19.98013	21.83702	11.93562	23.44849	26.32742
	50	650	6	96	3.92018274096932	-8.22433	-2.15E-15	-3.28204	-0.25322	3.89668	0	-0.8522	0	0.871119	-7.43195
	60	650	6	96	9.73381965749262	0.43537	18.00609	8.81869	3.886317	17.76316	19.76438	16.3836	14.41429	15.56018	0.300728
	70	650	6	96	14.694287209947	9.095067	0.135779	0.767548	8.025857	3.905541	0	-0.34575	0.01656	-8.97002	8.033409
	50	550	9	96	21.1258241577352	26.7279	6.288669	6.607472	17.03572	8.416058	7.310426	8.863453	7.977391	0.439586	28.05561
	60	550	9	96	25.3534509361808	35.3876	56.49484	46.64262	21.17526	50.98345	49.16388	51.41537	54.55444	63.43987	35.78829
	70	550	9	96	34.1029221136995	44.0473	15.75523	13.83701	25.3148	15.41629	27.09609	20.91891	15.14427	18.07618	43.52098
	50	600	9	96	0	8.699954	7.182407	5.477166	8.393492	8.703919	9.302929	9.216392	10.26181	9.691061	9.761607
	60	600	9	96	2.23350368289835	17.35965	8.239418	10.39175	12.53303	8.178843	8.361878	4.981655	9.033917	-2.13317	17.49429
	70	600	9	96	3.57650654677099	26.01935	12.28809	12.23546	16.67257	13.78573	14.85339	17.52862	11.93562	7158-11-01	25.22697
	50	650	9	96	7.23249101680355	-9.328	-2.33E-15	-3.7521	-0.24874	3.835792	0	-0.60021	0	3.708327	-8.5324
	60	650	9	96	9.92429805281609	-0.6683	13.38908	8.512853	3.890804	14.43916	13.75825	14.65876	14.41429	18.81957	-0.79972
	70	650	9	96	13.6063884100514	9914-07-01	0.035217	1.296713	8.030344	3.892862	0.02024	0.433386	0.01656	-9.73422	6.932965
	50	550	12	96	17.9202412375922	25.62424	6.287279	7.460935	17.04021	5.401975	6.250598	6.606237	7.977391	4.240192	26.95517
	60	550	12	96	29.1167661934202	34.28393	35.25555	35.99225	21.17975	34.20832	41.15943	40.69879	39.61556	53.95942	34.68785
	70	550	12	96	33.1573774015727	42.94363	64.61977	71.19183	25.31929	61.1502	42.54223	36.45828	65.45095	33.00996	42.42053
	50	600	12	96	38.546792781865	7.596286	5.324361	6.005295	8.397979	4.937759	7.360627	9.508131	10.26181	10.05875	8.661163
	60	600	12	96	58.9766799758776	16.25598	8.726066	8.317106	12.53752	6.292434	7.767421	8.028946	9.033917	-15.0465	16.39384
	70	600	12	96	0.673655542835422	24.91568	9.126022	12.1043	16.67706	12.38281	2617-12-01	9.406936	11.93562	23.21662	24.12653
	50	650	12	96	2.20273062991941	-10.4317	-2.04E-15	-2.59207	-0.24425	1.667187	0	1.507755	0	5.001833	-9.63284
	60	650	12	96	6.79509755817501	-1.77197	11.24372	9.672886	3.895291	11.48901	11.93114	15.12722	14.41429	6.832064	-1.90016
	70	650	12	96	10.8179459189237	6.887732	0.05922	1.16555	8.03483	1.565316	0.02277	0.668915	0.01656	2.692452	5.832521
	50	550	15	96	34.7917496947622	24.52057	5.370418	5.990722	17.04469	7.006387	6.018449	2.588423	7.977391	8.535033	25.85472
	60	550	15	96	53.5303000303975	33.18027	37.1857	30.63511	21.18423	30.29164	35.82284	34.92137	39.61556	56.026	33.58741
	70	550	15	96	73.1271605797621	41.83996	78.55562	99.76048	25.32377	80.6044	56.18334	74.22403	65.45095	46.13525	41.32009
	50	600	15	96	90.4059471189449	6.492619	5.666204	5.95059	8.402466	10.30556	8.400219	10.53305	10.26181	6.910402	7.560719
	60	600	15	96	119.047186161292	15.15232	6.743694	4.375472	12.54201	8.542717	7.486111	5.140874	9.033917	-20.4231	15.2934
	70	600	15	96	0	23.81201	8.722337	8.344262	16.68155	11.42992	12.05408	8.989089	11.93562	28.89872	23.02608
	50	650	15	96	1.65159378830287	-11.5353	-2.17E-15	-3.51745	-0.23976	3.711818	0	3.366073	0	2.552103	-10.7333
	60	650	15	96	2.38185731626816	-2.87563	12.10444	8.417908	3.899777	11.57762	11.33688	12.50805	14.41429	2.154087	-3.00061
	70	650	15	96	5.54709458510429	5.784065	0.01691	-0.28706	8.039317	3.456027	0.029146	-0.82029	0.01656	9.073169	4.732077
	50	550	0	120	6.82266663115869	36.25642	7.850615	10.02456	21.0208	11.30893	8.538875	6.325849	7.977391	-8.4527	37.95178
	60	550	0	120	14.2448694272812	44.91612	78.09546	68.88255	25.16034	76.7512	81.96179	76.89915	84.36702	80.40636	45.68446
	70	550	0	120	20.5101787160013	53.57581	9.699233	2.604722	29.29988	11.05179	19.69273	14.74759	15.14427	17.90374	53.41714
	50	600	0	120	28.3542491103951	18.22847	9.960407	9.17966	12.37857	9.22772	11.75654	12.93023	10.26181	12.96755	19.65778
	60	600	0	120	33.1589360955613	26.88817	14.99959	11.71329	16.51811	16.57244	14.58693	10.78155	10.76641	27.00214	27.39046
	70	600	0	120	41.9143674990523	35.54787	21.08358	14.83718	20.65765	23.92339	36.48166	32.59864	24.95038	23.71211	35.12314
	50	650	0	120	0	0.200521	0.336606	2.705047	3.736339	3.898346	0	-0.20894	0	11.66998	1.36377
	60	650	0	120	1.30435643113854	8.860219	66.08996	71.07961	7.875879	68.82606	51.61745	60.57094	46.90739	52.64003	9.096452
	70	650	0	120	2.60871286227708	17.51992	1.120385	-3.44681	12.01542	3.767444	0	1.481847	0	6.94725	16.82913
	50	550	3	120	6.36207106519072	35.15275	8.987907	6.738104	21.02528	9.524135	9.514232	8.711204	7.977391	2.708661	36.85134
	60	550	3	120	8.16640413753215	43.81245	81.22511	79.93297	25.16482	83.34826	85.3727	87.00224	84.36702	79.62877	44.58402
	70	550	3	120	12.034500663344	52.47215	23.02356	22.19347	29.30436	24.89592	22.19255	25.62995	15.14427	30.77409	52.3167
	50	600	3	120	15.8939028476222	17.1248	2061-10-01	3.313165	12.38305	9.932541	14.98569	19.29243	10.26181	15.61685	18.55733
	60	600	3	120	27.2340705288884	25.7845	12.27876	11.01476	16.52259	11.65312	12.05056	15.03557	10.76641	17.71248	26.29001
	70	600	3	120	34.6079909170186	34.4442	24.11048	18.09154	20.66213	27.19116	33.06999	32.89156	24.95038	28.07043	34.02269
	50	650	3	120	45.0088127189858	-0.90315	0.00763	-2.802	3.740826	-1.10474	0	-0.89612	0	4.910025	0.263326
	60	650	3	120	70.4632951766714	7.756551	34.8281	30.66938	7.880365	37.36382	39.87215	32.1797	46.90739	33.9411	7.996007
	70	650	3	120	0.929185615001081	16.41625	0.175764	0.613859	12.01991	-0.12528	0	1.109475	0	1.896304	15.72869
	50	550	6	120	2.88109902101006	34.04908	9.503651	12.15864	21.02977	13.09733	3448-09-01	9.610029	7.977391	8.740726	35.75089
	60	550	6	120	9.66976654107836	42.70878	88.10436	81.45887	25.16931	88.63383	88.03149	87.90176	84.36702	78.98656	43.48357
	70	550	6	120	17.8428582660476	51.36848	24.00205	25.51758	29.30885	24.84449	23.49696	27.91412	15.14427	33.98446	51.21626
	50	600	6	120	38.4944762703267	16.02114	20.84389	17.17306	12.38754	21.15303	15.72738	18.89212	10.26181	23.52715	17.45689
	60	600	6	120	48.0183170168344	24.68083	11.62534	14.42165	16.52708	12.50364	11.07462	10.04159	9.033917	18.94849	25.18957
	70	600	6	120	73.4019218980451	33.34053	29.09635	21.83055	20.66662	30.07438	31.58642	32.13868	23.98986	33.15902	32.92225
	50	650	6	120	92.8337499271952	-2.00681	0.22674	0.507936	3.745312	3.879722	0	-0.40461	0	-0.03581	-0.83712
	60	650	6	120	114.030407010341	6.652884	19.84811	13.99423	7.884852	18.7957	23.4778	17.63813	14.41429	22.32105	6.895563
	70	650	6	120	0	15.31258	0.29827	5.943091	12.02439	3.356378	0	1.487136	0.01656	-5.87121	14.62824
	50	550	9	120	0.791460660061915	32.94542	8.190618	9.408184	21.03426	10.50884	9.178469	9.314786	7.977391	7.088082	34.65045
	60	550	9	120	2.68487410479056	41.60511	78.75515	63.56247	25.17379	74.48036	74.89478	75.66266	84.36702	77.75616	42.38313
	70	550	9	120	7.26562296228773	50.26481	17.41964	20.07783	29.31333	19.23505	35.20483	30.19628	15.14427	28.73043	50.11581
	50	600	9	120	12.9499654764369	14.91747	11.98977	7.928236	12.39203	13.01396	14.7441	15.44445	10.26181	13.45089	16.35644
	60	600	9	120	21.7285984238537	23.57717	11.53441	14.22839	16.53157	10.59353	10.33569	7.449312	9.033917	9.29446	24.08912
	70	600	9	120	30.2666291323535	32.23686	24.34064	16.07209	20.67111	22.21341	24.73972	26.46237	23.98986	19.48138	31.82181
	50	650	9	120	44.3639528952073	-3.11048	-3.38E-15	-1.30103	3.749799	3.880329	0	-0.71834	0	0.856463	-1.93756
	60	650	9	120	56.9967984111772	5.549216	13.83876	12.34949	7.889339	16.20407	15.79723	14.81022	14.41429	23.63552	5.795119
	70	650	9	120	67.9293359121531	14.20891	0.14768	5.133347	12.02888	3.901417	0.02024	2.244835	0.01656	-8.58034	13.5278
	50	550	12	120	0	31.84175	8.741906	4.418038	21.03874	6.661619	7.625618	7.523872	7.977391	8.731734	33.55
	60	550	12	120	1.8742373405811	40.50145	45.87192	47.0685	25.17828	47.06438	61.19979	60.18022	39.61556	66.11875	41.28269
	70	550	12	120	3.8108361318334	49.16114	61.69206	71.58904	29.31782	68.66838	51.11248	49.17181	65.45095	41.50724	49.01537
	50	600	12	120	6.30911220668222	13.8138	11.28812	5.901049	12.39651	8.512405	12.26764	14.38447	10.26181	11.66161	15.256
	60	600	12	120	8.37085812683255	22.4735	11.09312	9.598424	16.53605	7.934588	9.436119	7.803491	9.033917	-5.77586	22.98868
	70	600	12	120	10.9955540132461	31.1332	19.70036	13.38562	20.67559	19.70997	19.51257	17.05971	23.98986	28.82524	30.72136
	50	650	12	120	13.3092911014148	-4.21415	-3.15E-15	-2.69631	3.754285	1.364707	0	0.532083	0	-0.00699	-3.03801
	60	650	12	120	46.567034549173	4.445548	11.33324	9542-10-01	7.893825	13.88968	13.71089	15.81133	14.41429	9.49107	4.694675
	70	650	12	120	59.3146483669913	13.10525	0.092961	2.446868	12.03336	1.926055	0.02277	1.757631	0.01656	1.689368	12.42736
	50	550	15	120	74.6924730294458	30.73808	7.068471	9.301825	21.04323	8.697261	7.823898	3.875712	7.977391	14.12542	32.44956
	60	550	15	120	106.502327829987	39.39778	46.29709	48.06535	25.18277	45.04421	52.20653	49.54342	39.61556	69.2842	40.18224
	70	550	15	120	0.933385467801387	48.05748	87.7775	106.5117	29.32231	100.3106	71.86118	91.56362	65.45095	55.73135	47.91492
	50	600	15	120	3.11198062586245	12.71013	13.54531	8.912052	12.401	16.46937	13.81946	15.36054	10.26181	9.61211	14.15555
	60	600	15	120	8.96759357562272	21.36983	8.651992	8.722498	16.54054	10.93556	9.050809	4.269208	9.033917	-10.0536	21.88824
	70	600	15	120	17.3094345376531	30.02953	19.38425	12.69129	20.68008	18.7171	18.31106	16.26391	23.98986	35.60616	29.62092
	50	650	15	120	32.0099714230627	-5.31782	-3.28E-15	-0.55599	3.758772	3.903074	0	8948-02-01	0	-1.35787	-4.13845
	60	650	15	120	46.5300758445303	3.341881	12.72901	12.76493	7.898312	13.52475	13.12684	13.24559	14.41429	5.911933	3.59423
	70	650	15	120	63.6021465802817	12.00158	0.042216	4.059967	12.03785	3.901318	0.036432	-0.4969	0.01656	9.168933	11.32691
	50	550	0	155	78.052830404553	45.32363	8.81321	9.622133	26.85199	12.19455	10.02307	6.981114	10.94891	3.058581	47.56925
	60	550	0	155	94.6227005600011	53.98332	108.7878	107.6212	30.99153	118.6027	126.3803	115.5579	118.6035	101.507	55.30193
	70	550	0	155	0	62.64302	27.6943	32.43019	35.13107	24.88191	26.86795	24.26475	36.37006	35.40189	63.03461
	50	600	0	155	0.363951371745707	27.29568	18.00241	22.60808	18.20976	19.10264	20.89695	18.37031	16.93191	16.69223	29.27524
	60	600	0	155	1.33354485700279	35.95538	18.48221	31.2706	22.3493	24.69393	21.67098	17.41202	16.93191	40.3161	37.00793
	70	600	0	155	5.02583050500313	44.61507	50.22398	48.46971	26.48884	59.57431	56.23984	60.55678	59.5756	33.42362	44.74061
	50	650	0	155	7.39126635933134	9.267729	0.233052	-3.56381	9.567535	3.760659	0	-0.06464	0	9.008888	10.98124
	60	650	0	155	10.6632096107462	17.92743	66.91316	63.48739	13.70708	77.43353	62.72251	82.03366	66.29569	59.56825	18.71392
	70	650	0	155	16.9689931319569	26.58712	3.580692	2.411452	17.84661	3.727752	0	0.380484	0.008572	10.27304	26.4466
	50	550	3	155	24.4868494562926	44.21996	10.26075	8.572911	26.85648	9.805515	11.49452	9.220942	10.94891	12.66206	46.46881
	60	550	3	155	32.0236942753789	52.87966	110.542	105.4205	30.99602	127.0383	131.7563	129.0749	118.6035	99.17146	54.20149
	70	550	3	155	40.8116229140333	61.53935	31.64883	38.78868	35.13556	37.83316	33.30042	38.04229	36.37006	46.71437	61.93417
	50	600	3	155	0	26.19201	17.68874	18.97883	18.21425	17.06122	25.83987	27.59441	16.93191	17.78366	28.1748
	60	600	3	155	2.84777793588879	34.85171	16.24606	22.29408	22.35379	19.03413	24.68247	26.3144	16.93191	29.46856	35.90748
	70	600	3	155	4.68161610462055	43.51141	46.92625	45.65981	26.49333	61.19671	54.47197	55.17889	59.5756	36.22407	43.64016
	50	650	3	155	5.75288469757771	8.164061	0.02045	-0.27718	9.572022	-2.95464	0	-1.29622	0	0.691047	9.880794
	60	650	3	155	8.25620375711852	16.82376	37.2839	28.80787	13.71156	40.59483	46.58401	44.28078	66.29569	39.31144	17.61348
	70	650	3	155	10.6373284226947	25.48346	1.078369	6.909252	17.8511	-0.47859	0	1.199915	0.008572	3.664197	25.34616
	50	550	6	155	12.0075280180597	43.11629	13.09012	12.95112	26.86096	16.54383	13.31916	10.39354	10.94891	19.9486	45.36836
	60	550	6	155	18.1396496912902	51.77599	110.9296	105.2361	31.0005	133.5376	137.5886	132.1868	118.6035	99.78374	53.10104
	70	550	6	155	29.3940488950631	60.43569	40.75535	40.40249	35.14004	43.50051	42.15683	41.48302	36.37006	51.17923	60.83372
	50	600	6	155	42.1381050606755	25.08834	32.22112	29.19219	18.21874	33.64709	30.45953	29.01801	16.93191	26.94841	27.07436
	60	600	6	155	72.4495143362035	33.74804	16.37953	21.38649	22.35828	20.03745	25.43271	23.91548	16.93191	31.95905	34.80704
	70	600	6	155	1.10416450894325	42.40774	42.61119	40.4237	26.49782	55.86874	49.37364	49.70392	59.5756	42.56716	42.53972
	50	650	6	155	2.75735433850169	7.060394	0.16891	0.613891	9.576509	3.862232	0	0.085395	0	-3.0003	8.78035
	60	650	6	155	5.69873609516059	15.72009	21.24997	9.045886	13.71605	19.11054	26.48094	21.16988	35.14562	28.94584	16.51303
	70	650	6	155	11.9464975109364	24.37979	0.516639	9.151651	17.85559	2.907184	0	2.947616	0.008572	-2.84883	24.24571
	50	550	9	155	24.1858492853189	42.01262	9.123454	17.33372	26.86545	11.65384	12.45418	10.85829	10.94891	16.0137	44.26792
	60	550	9	155	33.2997918848854	50.67232	106.3977	94.47278	31.00499	113.8181	125.5483	117.9752	118.6035	96.27115	52.0006
	70	550	9	155	44.7908062512134	59.33202	29.64286	32.36272	35.14453	32.23292	46.22704	44.83403	36.37006	43.64291	59.73328
	50	600	9	155	54.9966856242974	23.98468	17.86652	19.3872	18.22322	22.23038	24.8561	25.49193	16.93191	14.58989	25.97391
	60	600	9	155	67.791176587008	32.64437	12.22875	20.63305	22.36276	15.28099	19.42808	17.9644	16.93191	20.02275	33.70659
	70	600	9	155	0	41.30407	34.35069	28.51208	26.5023	38.52291	37.87844	40.56549	32.44152	26.60724	41.43927
	50	650	9	155	0.303601799320381	5.956726	-1.59E-14	-0.04098	9.580995	3.776274	0	-0.31032	0	-4.39029	7.679906
	60	650	9	155	1.15368683741745	14.61642	16.72327	8.555238	13.72053	17.22517	17.95929	15.08101	20.38801	27.97805	15.41259
	70	650	9	155	3.15745871293196	23.27612	0.057526	2.188731	17.86007	3.901099	0.01518	4.194636	0.008572	-7.84023	23.14527
	50	550	12	155	4.91834914899018	40.90896	9.897475	8.885194	26.86994	7.899008	11.25119	10.25468	10.94891	16.3294	43.16747
	60	550	12	155	10.6260629762133	49.56865	63.39062	64.29441	31.00948	82.04297	100.0346	96.43526	86.03777	83.30573	50.90015
	70	550	12	155	17.1838618415336	58.22835	71.56042	66.36609	35.14902	83.31098	68.72022	67.20666	94.53705	55.09179	58.63284
	50	600	12	155	22.8915756687567	22.88101	17.46334	18.07086	18.22771	16.79751	21.75748	22.69188	16.93191	11.47268	24.87347
	60	600	12	155	28.5385691361158	31.54071	10.43799	11.09599	22.36725	10.80552	13.68886	12.77539	16.93191	3.624519	32.60615
	70	600	12	155	39.1646321123292	40.2004	30.28093	20.98827	26.50679	31.78986	30.09766	29.28543	32.44152	34.62317	40.33883
	50	650	12	155	0	4.853058	-1.60E-14	-1.23372	9.585482	0.648242	0	-0.65442	0	-6.58169	6.579462
	60	650	12	155	3.20700588643669	13.51276	14.62765	11.91564	13.72502	16.31185	15.78753	16.34204	20.38801	12.50568	14.31214
	70	650	12	155	5.76829548914246	22.17245	0.07794	-1.21512	17.86456	2.334464	0.03312	3.019712	0.008572	1.101545	22.04482
	50	550	15	155	6.44020968082792	39.80529	7.92653	9837-11-01	26.87442	11.74429	12.02244	7.914091	10.94891	23.40413	42.06703
	60	550	15	155	8.33158020843855	48.46499	65.44518	63.50599	31.01396	82.10129	86.23875	78.91815	86.03777	88.15224	49.79971
	70	550	15	155	10.1631665873124	57.12468	99.80696	103.1037	35.1535	128.0356	87.91404	114.9723	137.4825	70.99696	57.53239
	50	600	15	155	10.9497226321636	21.77734	21.75128	21.52625	18.2322	28.38036	23.31441	23.09688	16.93191	11.10422	23.77302
	60	600	15	155	14.4200065577438	30.43704	9.040043	10.66444	22.37174	12.55264	12.38046	5.721569	16.93191	1.027804	31.5057
	70	600	15	155	22.144199126038	39.09674	29.97541	19.36308	26.51128	29.26535	27.52893	28.55617	32.44152	43.08517	39.23839
	50	650	15	155	33.1025316998506	3.749391	-1.47E-14	1.350985	9.589968	3.730004	0	0.441696	0	-6.25152	5.479017
	60	650	15	155	59.3816019574943	12.40909	16.31485	14.17075	13.72951	15.64935	15.36536	14.53383	20.38801	10.60759	13.2117
	70	650	15	155	0.921417785180631	21.06879	0.041532	-0.53288	17.86905	3.688674	0.03312	-0.00713	0.008572	10.26216	20.94438
	50	550	0	168	1.84366705637021	48.69145	9.704562	6.566185	29.01786	12.23868	3098-10-01	7.850147	10.94891	12.90689	51.14145
	60	550	0	168	4.23790913792957	57.35114	139.7202	137.9686	33.1574	133.6058	139.673	130.6211	152.5604	124.2596	58.87413
	70	550	0	168	8.97954562880721	66.01084	30.77378	34.40279	37.29694	29.11293	32.87546	27.83882	36.37006	49.10104	66.60682
	50	600	0	168	19.435241498029	30.6635	21.08231	20.33934	20.37564	23.12001	23.37921	20.33293	33.00994	21.69402	32.84745
	60	600	0	168	27.3654080211204	39.3232	29.00158	31.28263	24.51518	28.62196	26.76132	21.18108	33.00994	58.22239	40.58013
	70	600	0	168	34.4882016295218	47.98289	71.88566	77.89499	28.65472	71.71863	73.85059	72.96316	59.5756	42.27631	48.31281
	50	650	0	168	41.4312848539363	12.63555	-1.62E-14	2.044962	11.73341	3.886455	0	-0.04509	0	3.71047	14.55344
	60	650	0	168	51.9508957397934	21.29525	76.17945	83.75552	15.87295	83.36033	74.82463	91.11312	66.29569	67.17428	22.28612
	70	650	0	168	0	29.95494	0.334794	6.649949	20.01249	3.891098	0	-0.16972	0.008572	8.825514	30.0188
	50	550	3	168	0.365126402361465	47.58778	11.12911	3873-07-01	29.02235	10.26342	13.04079	10.13727	10.94891	23.55703	50.04101
	60	550	3	168	1.52203021248694	56.24748	141.8307	147.0498	33.16189	144.0054	144.8469	145.5845	152.5604	122.9708	57.77369
	70	550	3	168	4.3207964684735	64.90717	41.09849	32.89253	37.30143	43.384	43.53245	42.76823	36.37006	61.46017	65.50637
	50	600	3	168	6.32899168146156	29.55983	20.31875	22.0627	20.38012	20.59456	30.53603	30.71834	33.00994	23.83212	31.747
	60	600	3	168	13.8136808082831	38.21953	28.00381	28.47406	24.51966	23.43452	31.29873	31.86914	33.00994	48.42148	39.47968
	70	600	3	168	22.5143856187402	46.87923	73.76763	67.13056	28.6592	75.44588	68.51056	65.18625	59.5756	46.12342	47.21237
	50	650	3	168	30.8495619052473	11.53188	-2.66E-14	-3.36817	11.73789	-3.32575	0	-1.64658	0	-3.56069	13.453
	60	650	3	168	40.097554197658	20.19158	47.58813	35.12992	15.87743	45.16527	52.62156	50.34735	66.29569	47.96417	21.18568
	70	650	3	168	53.1797758364527	28.85128	-7.45E-15	-3.58836	20.01697	-0.04547	0	0.628559	0.008572	3.263343	28.91836
	50	550	6	168	0	46.48411	16.08266	16.59185	29.02684	18.30644	14.18154	11.51997	10.94891	32.78399	48.94056
	60	550	6	168	1.52786348557857	55.14381	150.0452	156.9307	33.16638	149.7366	152.3852	149.851	152.5604	125.5236	56.67325
	70	550	6	168	3.78585642444248	63.80351	54.04264	44.57164	37.30592	52.09911	45.65022	46.9175	36.37006	67.86548	64.40593
	50	600	6	168	4.59593564072846	28.45616	46.27591	44.79931	20.38461	38.63745	31.90336	32.98182	33.00994	34.93734	30.64656
	60	600	6	168	6.30838902029382	37.11586	49.2411	40.91125	24.52415	24.35075	28.49646	30.98762	33.00994	52.85246	38.37924
	70	600	6	168	7.93266251419671	45.77556	70.12072	61.49585	28.66369	67.22594	60.70873	57.25674	59.5756	54.40693	46.11192
	50	650	6	168	8.47408701216435	10.42821	-2.69E-14	2.349239	11.74238	3.635749	0	0.042662	0	-5.31162	12.35255
	60	650	6	168	10.3670152243856	19.08791	24.26679	21.01581	15.88192	21.12664	30.19385	23.91739	35.14562	39.53902	20.08523
	70	650	6	168	16.587224359017	27.74761	-7.33E-15	4.301906	20.02146	2.901706	0	2.819474	0.008572	-1.30927	27.81792
	50	550	9	168	25.3299660894996	45.38044	10.71943	12.90821	29.03132	12.58394	14.90858	12.38562	10.94891	26.12337	47.84012
	60	550	9	168	49.4089535344009	54.04014	150.9269	143.2567	33.17086	129.3811	134.8948	135.4376	152.5604	119.2852	55.5728
	70	550	9	168	0.91096311318157	62.69984	35.91667	30.89314	37.3104	40.11963	57.90119	50.79312	36.37006	57.60343	63.30548
	50	600	9	168	1.63973360372683	27.3525	24.72668	26.93665	20.3891	26.28609	30.41344	29.65297	20.77041	19.85308	29.54611
	60	600	9	168	4.01542951205034	36.01219	20.22545	37.25567	24.52864	18.16025	25.13846	24.18747	20.77041	38.19046	37.2788
	70	600	9	168	8.29815477967896	44.67189	46.00848	49.08488	28.66818	45.13591	47.52435	46.14143	32.44152	35.72132	45.01148
	50	650	9	168	18.5956338656564	9.324546	-2.68E-14	3.66113	11.74687	3.368669	0	-0.13026	0	-9.42733	11.25211
	60	650	9	168	25.3343636318496	17.98424	17.98855	25.82348	15.88641	17.80213	19.71256	16.00187	20.38801	35.84553	18.98479
	70	650	9	168	30.8852454438809	26.64394	-7.55E-15	6.864075	20.02595	3.75563	0.02024	4.388366	0.008572	-9.02637	26.71747
	50	550	12	168	35.6246509037756	44.27678	12.51941	4.327541	29.03581	9.198841	13.10191	12.36201	10.94891	25.15458	46.73968
	60	550	12	168	45.3827439358956	52.93647	105.1921	112.5072	33.17535	99.89846	119.1707	112.0057	86.03777	105.0353	54.47236
	70	550	12	168	0	61.59617	81.56223	76.93667	37.31489	91.93705	73.30209	74.11853	94.53705	67.76784	62.20504
	50	600	12	168	5.87021399538087	26.24883	23.85795	25.48816	20.39358	20.50362	26.17278	26.30644	20.77041	15.45136	28.44567
	60	600	12	168	6.67923958504838	34.90853	14.55342	9.297927	24.53312	12.67961	16.33425	16.78487	20.77041	20.50764	36.17835
	70	600	12	168	7.57949051664206	43.56822	36.57896	38.88472	28.67266	36.17604	36.06949	33.91455	32.44152	42.45277	43.91103
	50	650	12	168	8.00538039630344	8.220878	-2.68E-14	2.336242	11.75135	0.086327	0	-0.92281	0	-12.9032	10.15166
	60	650	12	168	8.6337787363488	16.88058	14.12621	7632-10-01	15.89089	16.8766	17.16806	16.81589	20.38801	19.08859	17.88435
	70	650	12	168	9.46865418774966	25.54027	0.009236	-2.26439	20.03043	2.248959	0.02277	3.122465	0.008572	-1.3691	25.61703
	50	550	15	168	10.2625989037254	43.17311	2333-12-01	9.539203	29.0403	13.73889	14.03929	10.69222	10.94891	33.1208	45.63923
	60	550	15	168	11.6303676458465	51.83281	106.3594	110.5066	33.17984	100.1276	100.53	92.10403	86.03777	110.7733	53.37191
	70	550	15	168	0	60.4925	116.5838	116.8004	37.31938	139.1512	96.67295	123.2832	137.4825	84.56448	61.10459
	50	600	15	168	7.1411953160604	25.14516	30.97038	30.56025	20.39807	33.01606	28.63362	26.34823	20.77041	15.97437	27.34523
	60	600	15	168	22.6742896811435	33.80486	12.1467	11.57521	24.53761	13.28278	16.38883	7.766759	20.77041	18.80241	35.07791
	70	600	15	168	51.4636903032829	42.46456	32.92094	36.23114	28.67715	32.71055	33.42633	33.31647	32.44152	51.80622	42.81059
	50	650	15	168	78.0654233387393	7.117211	-2.56E-14	6.666038	11.75584	3.402625	0	-0.5719	0	-11.6816	9.05122
	60	650	15	168	108.287479104171	15.77691	16.76109	15.85553	15.89538	16.30237	16.48352	15.17939	20.38801	18.08198	16.7839
	70	650	15	168	138.628648169549	24.43661	0.000486	5.593319	20.03492	3.255009	0.036432	-0.02561	0.008572	8.682987	24.51658
	50	550	0	192	159.553518712089	54.90896	10.99065	10.94005	33.0164	12.66973	13.38855	11.57245	13.17826	22.18468	57.73629
	60	550	0	192	188.456506772635	63.56866	172.3408	157.5446	37.15594	156.5538	155.627	158.8212	173.3202	142.9101	65.46897
	70	550	0	192	0	72.22836	35.20786	38.86584	41.29548	34.41011	40.23973	34.39848	45.3949	63.05623	73.20165
	50	600	0	192	1.90192779794627	36.88101	26.63743	31.11271	24.37417	29.37042	27.40178	24.55679	35.72035	27.18917	39.44228
	60	600	0	192	5.19285684240971	45.54071	34.03201	36.84142	28.51371	37.22708	37.4024	30.10648	35.72035	73.09003	47.17496
	70	600	0	192	6.7738341374754	54.20041	82.84511	100.9561	32.65325	84.88472	76.92504	98.16325	97.50714	52.44884	54.90765
	50	650	0	192	8.41524117588656	18.85306	-1.61E-14	-7.19922	15.73194	3.785311	0	0.193278	0	2.869179	21.14828
	60	650	0	192	27.1990832508814	27.51276	104.9092	107.5981	19.87148	100.0958	91.06435	109.2837	66.29569	75.70547	28.88096
	70	650	0	192	30.1308045161994	36.17246	0.390849	1.077158	24.01102	3.855781	0	-0.77503	0.008572	12.66158	36.61364
	50	550	3	192	34.4485697655307	53.80529	13.30725	11.06645	33.02089	13.28801	16.3184	14.11924	13.17826	32.40617	56.63584
	60	550	3	192	37.6134816181659	62.46499	175.3591	173.1379	37.16043	174.7333	171.4187	176.7052	173.3202	141.1926	64.36853
	70	550	3	192	43.0803721784241	71.12469	50.44739	45.43682	41.29997	54.95565	51.95529	51.37347	45.3949	74.98666	72.10121
	50	600	3	192	1.41238056135056	35.77734	32.93899	32.15938	24.37866	27.70066	39.25554	37.20979	35.72035	28.89861	38.34184
	60	600	3	192	7.24280894313258	44.43704	34.61012	33.17166	28.5182	35.86066	44.32987	43.91518	35.72035	62.86047	46.07452
	70	600	3	192	7.79537258418376	53.09674	90.14454	90.8995	32.65774	97.03123	88.21275	86.05594	97.50714	55.86731	53.8072
	50	650	3	192	8.4718220601254	17.74939	-2.64E-14	-7.74416	15.73643	-3.89227	0	-2.31366	0	-4.83065	20.04783
	60	650	3	192	9.3365615963807	26.40909	59.84451	61.02927	19.87597	60.5922	65.83191	63.85209	66.29569	56.06672	27.78051
	70	650	3	192	10.1360764712201	35.06879	0.060669	-5.53531	24.01551	0.776527	0	-1.0201	0.008572	6.670768	35.5132
	50	550	6	192	10.9364117820523	52.70163	24.05833	27.12238	33.02537	24.3109	19.03679	16.04291	23.77499	43.23205	55.5354
	60	550	6	192	13.4051036839424	61.36132	173.4113	173.1869	37.16491	177.7968	180.5785	183.5431	173.3202	145.3441	63.26808
	70	550	6	192	17.4149845980294	70.02102	70.05925	68.75879	41.30445	69.12155	56.92778	57.23109	72.12268	82.9909	71.00076
	50	600	6	192	28.6090132817744	34.67368	54.22312	61.84251	24.38314	47.41408	41.11553	41.20342	64.73331	41.60273	37.24139
	60	600	6	192	3.70796576192652	43.33337	44.57711	43.15355	28.52268	37.74905	41.89965	46.41551	64.73331	68.89034	44.97408
	70	600	6	192	9.87344961683677	51.99307	78.87758	81.23028	32.66222	86.48545	72.67136	73.0821	97.50714	65.74974	52.70676
	50	650	6	192	23.620487203407	16.64573	-2.66E-14	0.66607	15.74092	2.570973	0	-0.26584	0	-4.9827	18.94739
	60	650	6	192	56.3738561515996	25.30542	29.28493	40.20617	19.88046	29.93095	37.77461	31.5618	35.14562	49.24045	26.68007
	70	650	6	192	82.1150962921162	33.96512	-7.45E-15	-1.72753	24.02	2.581217	0	1.445222	0.008572	3.697029	34.41275
	50	550	9	192	118.085873796255	51.59796	19.30469	21.91618	33.02986	17.90744	20.65091	17.7848	23.77499	34.62569	54.43496
	60	550	9	192	151.641721775131	60.25766	182.3481	164.078	37.1694	154.8686	163.5093	169.5235	173.3202	137.1601	62.16764
	70	550	9	192	174.664786014663	68.91735	48.00616	53.75723	41.30894	55.48537	70.66043	62.51686	72.12268	70.7832	69.90032
	50	600	9	192	205.697655694613	33.57001	30.4232	24.8175	24.38763	34.46915	39.68967	38.4997	28.80992	24.57273	36.14095
	60	600	9	192	0	42.22971	28.61457	31.41595	28.52717	28.5625	37.76808	38.72995	28.80992	52.2826	43.87363
	70	600	9	192	0.273423630761611	50.8894	52.3321	60.3881	32.66671	56.50016	59.4834	57.33715	49.12408	45.11835	51.60631
	50	650	9	192	2.00151367380116	15.54206	-2.66E-14	-2.92579	15.7454	1.971418	0	0.238977	0	-11.0441	17.84694
	60	650	9	192	14.2867140612077	24.20176	20.46699	12.38606	19.88494	20.87449	23.74185	19.65863	20.38801	43.60123	25.57963
	70	650	9	192	16.92531796884	32.86146	-7.65E-15	0.045441	24.02448	2.916766	0.02024	3.602852	0.008572	-5.96579	33.31231
	50	550	12	192	21.8393981238026	50.49429	18.24754	12.89463	33.03435	15.30893	18.76715	18.96047	23.77499	32.50845	53.33451
	60	550	12	192	34.8567822022566	59.15399	125.3532	131.2977	37.17389	131.6564	149.6234	143.2182	140.9932	121.7617	61.06719
	70	550	12	192	41.6832109442477	67.81369	113.0274	105.8729	41.31343	106.8194	86.82076	87.58311	94.53705	79.79905	68.79987
	50	600	12	192	50.150720413576	32.46634	29.40919	29.49755	24.39212	28.12947	34.67154	34.29148	28.80992	19.02257	35.04051
	60	600	12	192	55.7024297451373	41.12604	21.99141	13.45766	28.53166	20.41164	24.27433	27.39636	28.80992	33.45137	42.77319
	70	600	12	192	61.8950019099029	49.78574	41.18761	53.16652	32.6712	43.79863	42.69375	42.60989	49.12408	50.70136	50.50587
	50	650	12	192	1.51860989128794	14.43839	-2.65E-14	1.877847	15.74989	-1.15841	0	-1.02329	0	-15.6685	16.7465
	60	650	12	192	4.84254353924763	23.09809	15.63992	7.325237	19.88943	18.11809	19.36013	18.59697	20.38801	25.69584	24.47918
	70	650	12	192	5.57024062633223	31.75779	0.009066	-6.10444	24.02897	1.576285	0.02277	2.416019	0.008572	0.543041	32.21186
	50	550	15	192	7.92095549878478	49.39062	17.79895	23.74192	33.03883	19.93191	20.92057	18.67822	23.77499	41.03276	52.23407
	60	550	15	192	11.9476555027106	58.05032	128.6286	126.6811	37.17837	131.3337	113.5155	119.1978	140.9932	128.0578	59.96675
	70	550	15	192	13.5963674182623	66.71002	151.035	149.2394	41.31791	154.7389	111.7152	138.6568	137.4825	97.15379	67.69943
	50	600	15	192	16.4431766504166	31.36267	38.49019	39.05536	24.3966	40.88326	31.80249	33.40883	28.80992	20.10368	33.94006
	60	600	15	192	24.4849844957494	40.02237	18.94418	11.96899	28.53614	17.92505	25.61315	14.26718	28.80992	32.30423	41.67274
	70	600	15	192	32.819320588388	48.68207	36.3966	45.26888	32.67568	38.60009	35.33421	42.07108	49.12408	60.61289	49.40542
	50	650	15	192	49.1297233178123	13.33472	-2.54E-14	9.00763	15.75438	2.82448	0	-1.9996	0	-13.8887	15.64606
	60	650	15	192	4.48199764882934	21.99442	18.50468	12.75439	19.89392	17.81826	18.68103	16.56587	20.38801	25.24732	23.37874
	70	650	15	192	12.9398485624047	30.65412	0.00051	0.611972	24.03346	2.136357	0.029146	-0.63142	0.008572	11.15322	31.11142
	50	550	0	216	23.9131462845485	61.12647	12.20962	12.62632	37.01493	14.37868	13.79511	19.49496	13.17826	33.55963	64.33112
	60	550	0	216	55.4411699373254	69.78617	190.677	185.5708	41.15447	164.4636	165.7477	186.8599	202.0807	166.0658	72.06381
	70	550	0	216	90.8364024152583	78.44587	38.83666	52.00381	45.29401	38.24051	40.70781	40.96125	45.3949	78.03191	79.79649
	50	600	0	216	127.685276893058	43.09853	34.65292	23.88547	28.37271	33.1151	33.32917	30.621	35.72035	36.64724	46.03712
	60	600	0	216	152.941894879253	51.75822	46.11327	39.43723	32.51225	47.24574	40.33537	41.53967	35.72035	94.32912	53.7698
	70	600	0	216	172.132740060494	60.41792	104.5353	97.04091	36.65179	84.5301	72.79898	125.5349	97.50714	65.50768	61.50248
	50	650	0	216	199.051183350588	25.07058	-1.63E-14	-2.26673	19.73048	3.22478	0	1.332587	0	2.814718	27.74311
	60	650	0	216	0	33.73027	125.0745	131.5346	23.87002	117.1793	94.37439	128.6429	117.0512	87.43204	35.47579
	70	650	0	216	0.362645402554227	42.38997	-5.26E-15	4.236159	28.00956	3.343048	0	-0.20093	0.008572	16.20782	43.20848
	50	550	3	216	1.02914961722103	60.02281	17.28657	19.28044	37.01942	19.59466	23.46951	22.48651	13.17826	42.33195	63.23068
	60	550	3	216	13.3686795637202	68.6825	203.416	203.7537	41.15896	193.066	171.4187	207.986	202.0807	162.8991	70.96336
	70	550	3	216	17.2520024511559	77.3422	56.12436	63.17017	45.2985	66.3834	60.61298	59.65729	45.3949	88.51321	78.69604
	50	600	3	216	25.7920073610922	41.99486	41.60381	42.61792	28.37719	34.52018	39.25554	45.63844	35.72035	36.90753	44.93667
	60	600	3	216	43.0272502420735	50.65456	49.20675	49.51502	32.51673	53.92691	59.71376	58.0377	35.72035	82.65036	52.66936
	70	600	3	216	55.0192201865453	59.31425	107.1981	106.1184	36.65627	106.4902	88.21275	109.5728	97.50714	67.47689	60.40204
	50	650	3	216	73.9741927696865	23.96691	-2.63E-14	0.118566	19.73496	-3.78065	0	-2.30946	0	-6.33428	26.64267
	60	650	3	216	86.0984816953196	32.62661	77.10613	78.0539	23.8745	80.40729	84.91013	79.75659	117.0512	66.34403	34.37535
	70	650	3	216	97.8566696369191	41.2863	-7.33E-15	0.275421	28.01404	1.346072	0	-2.72219	0.008572	8.767817	42.10803
	50	550	6	216	2.05782597435483	58.91914	32.34001	32.37299	37.02391	34.321	28.27707	25.07511	23.77499	54.10014	62.13024
	60	550	6	216	3.93284730409502	67.57884	200.4486	200.8393	41.16345	194.1224	180.5785	217.9318	202.0807	167.9932	69.86292
	70	550	6	216	4.67996193860701	76.23853	84.47651	83.36734	45.30299	82.91694	68.07102	67.62832	72.12268	97.45977	77.5956
	50	600	6	216	5.92708905423607	40.89119	67.6735	76.56277	28.38168	54.60418	41.11553	51.49642	64.73331	50.55395	43.83623
	60	600	6	216	8.04167210052532	49.55089	80.09046	63.75863	32.52122	59.46738	59.3968	64.3952	64.73331	89.62257	51.56891
	70	600	6	216	8.72499871523309	58.21059	96.53649	100.5494	36.66076	97.82241	72.67136	91.49948	97.50714	78.30165	59.30159
	50	650	6	216	10.2836273908326	22.86324	-2.66E-14	-4.46674	19.73945	1.879202	0	-0.32924	0	-5.54399	25.54222
	60	650	6	216	19.6230698112085	31.52294	41.63571	44.23527	23.87899	45.01076	49.89145	42.28599	35.14562	60.46003	33.27491
	70	650	6	216	25.9204554532537	40.18264	-7.36E-15	-9.07375	28.01853	2.298096	0	-1.14612	0.008572	6.736415	41.00759
	50	550	9	216	43.0869732174334	57.81547	26.16654	26.90097	37.02839	29.53783	31.71179	27.76051	23.77499	43.0722	61.02979
	60	550	9	216	11.8465147586353	66.47517	187.3443	187.1107	41.16793	167.5009	163.5093	205.2887	202.0807	157.3874	68.76247
	70	550	9	216	20.6413737271784	75.13487	51.22501	49.78416	45.30747	65.77259	84.31661	74.95982	72.12268	82.83044	76.49515
	50	600	9	216	29.7695047577342	39.78752	42.67948	37.66616	28.38617	43.39966	39.68967	49.64112	39.75588	31.10243	42.73579
	60	600	9	216	54.9390258828747	48.44722	41.38264	51.99944	32.52571	48.33806	55.45772	56.69521	39.75588	70.59323	50.46847
	70	600	9	216	86.4511741522409	57.10692	60.64758	60.08418	36.66524	64.62564	59.4834	70.32758	49.12408	55.24867	58.20115
	50	650	9	216	120.355542840094	21.75957	-2.66E-14	-2.90053	19.74394	1.347578	0	1.026981	0	-14.027	24.44178
	60	650	9	216	167.029471676714	30.41927	26.08841	33.34931	23.88348	28.34331	30.7749	26.08667	20.38801	52.39924	32.17446
	70	650	9	216	186.929558130359	39.07897	0.000376	4.298488	28.02302	2.255877	0.013493	1.129517	0.008572	-5.34801	39.90714
	50	550	12	216	215.11761060403	56.7118	25.5397	24.86684	37.03288	27.7224	29.97887	30.15812	23.77499	40.68567	59.92935
	60	550	12	216	0	65.3715	152.0367	153.6695	41.17242	149.7368	149.6234	177.0331	140.9932	141.7198	67.66203
	70	550	12	216	0.362341096414728	74.0312	109.3326	116.6618	45.31196	111.0987	101.7048	102.0654	94.53705	91.57703	75.39471
	50	600	12	216	1.02630292938011	38.68386	40.19732	44.22602	28.39065	36.98951	34.67154	44.71179	39.75588	25.28295	41.63534
	60	600	12	216	6.64172132147999	47.34355	33.49441	28.27257	32.53019	36.87097	39.93676	41.83587	39.75588	51.49265	49.36802
	70	600	12	216	10.5042914243804	56.00325	51.17438	60.86366	36.66973	50.40782	42.69375	51.99564	49.12408	60.56239	57.1007
	50	650	12	216	16.4774559765866	20.65591	-2.66E-14	3.15102	19.74842	-0.87382	0	-0.23975	0	-18.9206	23.34134
	60	650	12	216	25.8416881781014	29.3156	20.61413	19.28523	23.88796	21.23002	23.096	21.99713	20.38801	34.22454	31.07402
	70	650	12	216	34.4690374214222	37.9753	0.045334	6.149666	28.0275	1.265216	0.01518	0.179629	0.008572	0.891529	38.8067
	50	550	15	216	48.4098658982696	55.60814	26.67437	27.66495	37.03737	29.85592	25.86306	31.27449	23.77499	50.2733	58.8289
	60	550	15	216	59.0939010216699	64.26783	155.1996	147.0296	41.17691	147.8261	132.9784	149.2837	140.9932	149.0791	66.56158
	70	550	15	216	67.3029802379865	72.92753	152.5942	155.4595	45.31645	154.4322	117.5298	154.6405	137.4825	109.9951	74.29427
	50	600	15	216	3.1963712608274	37.58019	46.8578	45.73465	28.39514	47.28716	34.75596	42.52537	39.75588	27.42737	40.5349
	60	600	15	216	4.63557602805158	46.23989	29.44709	24.76066	32.53468	29.81599	27.61271	24.40915	39.75588	51.40881	48.26758
	70	600	15	216	5.35517841166367	54.89958	46.68387	52.66348	36.67422	43.98995	48.23068	50.78042	49.12408	71.53725	56.00026
	50	650	15	216	6.61448258298483	19.55224	-2.54E-14	2.231621	19.75291	3.908073	0	-2.22814	0	-16.0776	22.24089
	60	650	15	216	9.73659903629158	28.21194	20.19897	17.24859	23.89245	20.71263	19.86089	18.27322	20.38801	34.83932	29.97357
	70	650	15	216	10.0964002280976	36.87163	0.009648	7.121008	28.03199	1.778595	0.02484	-2.30259	0.008572	12.56503	37.70625
	50	550	0	240	12.8241603707092	67.34399	27.41184	16.06911	41.01347	17.74441	18.85711	33.01648	42.93059	31.29669	70.92596
	60	550	0	240	18.1003946767685	76.00369	190.677	187.2433	45.15301	150.1154	143.614	214.0659	202.0807	169.5622	78.65864
	70	550	0	240	25.3590183659494	84.66338	44.70338	45.30526	49.29255	41.70318	49.92402	47.70759	45.3949	70.67426	86.39132
	50	600	0	240	46.8822136629591	49.31604	44.2253	39.10684	32.37124	34.37484	29.12968	39.76561	71.44759	26.19297	52.63195
	60	600	0	240	8.20647691952096	57.97574	64.32402	58.36241	36.51078	56.04753	68.12512	55.37923	71.44759	89.63419	60.36464
	70	600	0	240	17.3301086489568	66.63543	102.2707	101.3119	40.65032	74.60227	71.97685	154.1368	97.50714	49.95876	68.09732
	50	650	0	240	22.1939527630761	31.28809	0.233835	0.137549	23.72901	3.888086	0	4.376739	0	3.673855	34.33795
	60	650	0	240	34.1746437182394	39.94779	145.0431	149.3954	27.86855	123.0641	96.33728	148.2415	117.0512	94.05059	42.07063
	70	650	0	240	44.7559426828897	48.60749	0.549502	9.342163	32.00809	3.898965	0	1.957249	0.008572	11.97242	49.80331
	50	550	3	240	59.4138349249217	66.24032	29.39139	20.22506	41.01796	27.36681	23.46951	36.52577	42.93059	39.47339	69.82551
	60	550	3	240	103.580039493067	74.90002	203.416	204.4781	45.15749	184.6498	165.2077	238.7352	202.0807	165.8	77.5582
	70	550	3	240	123.984935670908	83.55972	60.15264	59.61083	49.29703	72.35203	60.61298	67.57632	45.3949	80.56004	85.29088
	50	600	3	240	150.815857410915	48.21237	50.45565	59.57826	32.37573	39.40731	35.15767	57.10153	71.44759	25.85767	51.53151
	60	600	3	240	0	56.87207	69.76257	75.88227	36.51527	71.54387	59.71376	73.99446	71.44759	77.35991	59.26419
	70	600	3	240	0.419447138108883	65.53177	104.2299	121.9186	40.65481	101.1831	79.59601	134.9913	97.50714	51.3325	66.99687
	50	650	3	240	7.43648694504279	30.18442	-2.56E-14	-10.0244	23.7335	-1.16643	0	-0.56218	0	-6.07071	33.2375
	60	650	3	240	44.9546029996336	38.84412	91.09367	87.8434	27.87304	94.51644	84.91013	97.06568	117.0512	72.36706	40.97019
	70	650	3	240	51.162920796929	47.50382	-7.55E-15	1.435947	32.01258	2.991768	0	-3.56679	0.008572	3.936844	48.70287
	50	550	6	240	57.7111435934531	65.13665	48.47948	49.82945	41.02244	45.0005	28.27707	39.75333	42.93059	54.94791	68.72507
	60	550	6	240	69.0747209804202	73.79635	200.4486	218.0755	45.16198	186.043	176.6297	252.2733	202.0807	174.6004	76.45775
	70	550	6	240	77.4971035618861	82.45605	94.02755	93.0694	49.30152	86.59801	68.07102	77.88751	72.12268	93.21287	84.19043
	50	600	6	240	93.7976742674618	47.1087	73.35566	110.035	32.38021	58.29974	40.70316	64.78573	71.44759	43.2104	50.43106
	60	600	6	240	107.584374085341	55.7684	101.9776	106.6377	36.51975	82.14681	59.3968	84.35623	71.44759	88.03839	58.16375
	70	600	6	240	124.731365793816	64.4281	100.2293	129.6111	40.65929	96.51612	72.24813	112.2696	97.50714	65.86346	65.89643
	50	650	6	240	1.60258736628813	29.08075	-2.58E-14	-1.40338	23.73799	3.886463	0	0.789042	0	-1.5741	32.13706
	60	650	6	240	3.19859281444516	37.74045	60.43809	67.23104	27.87752	60.78319	49.89145	55.2766	35.14562	70.18937	39.86974
	70	650	6	240	3.75341560330651	46.40015	-7.46E-15	2.042604	32.01706	3.885614	0	-4.16967	0.008572	5.611775	47.60242
	50	550	9	240	4.98958758723613	64.03299	43.74739	35.22776	41.02693	43.96526	31.71179	43.26723	42.93059	41.02618	67.62463
	60	550	9	240	7.15739717303275	72.69268	187.3443	182.0739	45.16647	159.3344	160.9389	241.9411	202.0807	161.1008	75.35731
	70	550	9	240	7.3423381026532	81.35238	56.96957	47.57031	49.30601	66.42246	84.31661	87.84078	72.12268	75.68977	83.08999
	50	600	9	240	12.9009654219139	46.00504	54.93091	66.94131	32.3847	51.00215	37.00428	63.81669	71.44759	20.86509	49.33062
	60	600	9	240	18.0212479635066	54.66473	71.41464	77.53803	36.52424	71.87106	55.45772	77.43093	71.44759	66.11533	57.0633
	70	600	9	240	25.8714468691557	63.32443	67.23701	77.99711	40.66378	66.84652	55.63498	85.60254	49.12408	39.91682	64.79598
	50	650	9	240	46.9450154865073	27.97709	-2.59E-14	0.914428	23.74247	3.889671	0	2.930321	0	-12.9509	31.03662
	60	650	9	240	9.886147465693	36.63679	35.129	34.73094	27.88201	38.74889	30.7749	34.92211	20.38801	59.23471	38.7693
	70	650	9	240	16.1311871810366	45.29648	-7.39E-15	-0.00754	32.02155	3.879644	0.013493	-2.84548	0.008572	-9.36644	46.50198
	50	550	12	240	18.6189866924453	62.92932	46.22463	42.41422	41.03141	42.92175	29.97887	46.69938	42.93059	49.60948	66.52418
	60	550	12	240	32.5993822186541	71.58902	152.0367	168.0864	45.17095	145.6165	141.1227	212.7791	140.9932	156.403	74.25686
	70	550	12	240	46.9322818474296	80.24871	123.5825	114.1206	49.31049	100.2992	101.7048	117.4223	94.53705	95.40623	81.98955
	50	600	12	240	71.1763190705193	44.90137	49.01772	72.67436	32.38919	45.38214	33.73218	58.1952	71.44759	26.01545	48.23018
	60	600	12	240	109.980880369059	53.56107	60.00531	63.21758	36.52873	58.18253	39.93676	59.54419	71.44759	57.98451	55.96286
	70	600	12	240	130.085795095514	62.22076	57.0609	80.54494	40.66827	54.17484	50.66938	62.92169	49.12408	56.20029	63.69554
	50	650	12	240	159.086036153304	26.87342	-2.58E-14	3.190394	23.74696	3.020444	0	2.026829	0	-6.87469	29.93617
	60	650	12	240	0	35.53312	26.85741	27.1245	27.8865	26.68743	23.096	27.2085	20.38801	52.02985	37.66885
	70	650	12	240	0.641619428790775	44.19282	0.014564	0.663209	32.02604	3.26511	0.01518	-3.85132	0.008572	7.842951	45.40153
	50	550	15	240	24.2056201601451	61.82565	45.23845	39.66474	41.0359	40.78829	29.64591	48.9889	42.93059	54.93621	65.42374
	60	550	15	240	65.3849465919464	70.48535	155.1996	154.2566	45.17544	141.6552	118.5773	181.7515	140.9932	159.5014	73.15642
	70	550	15	240	77.8482282598695	79.14505	148.0889	139.1867	49.31498	134.5521	112.2204	171.5536	137.4825	109.5634	80.8891
	50	600	15	240	86.0954133903267	43.7977	51.48227	68.6354	32.39367	51.08927	38.42687	54.27922	71.44759	23.89897	47.12973
	60	600	15	240	103.247764739058	52.4574	56.17712	52.51571	36.53321	46.17626	36.30214	37.92388	71.44759	53.63976	54.86241
	70	600	15	240	115.087606599331	61.1171	52.59692	65.35207	40.67275	47.46301	51.69493	59.93109	49.12408	62.91424	62.5951
	50	650	15	240	137.654515709858	25.76975	-2.46E-14	0.789101	23.75144	8.138237	2.930388	-0.58131	0	-8.29255	28.83573
	60	650	15	240	157.829047277012	34.42945	26.43987	21.9636	27.89098	25.13813	22.36977	20.5832	20.38801	48.38373	36.56841
	70	650	15	240	173.593384551654	43.08915	0.002192	-1.29244	32.03052	3.904119	3.073637	-5.41206	0.008572	15.25553	44.30109
